# Supplementary material for: Modular and chromatography-free synthesis of natural linear polyamines
Source: Royal Society of Chemistry journal article supplement (doi:10.1039/d5ob01807b), 2025-12-16

## Supporting Information

### Modular and Chromatography-Free Synthesis of Natural Linear Polyamines

Masato Takahashi,<sup>a\*</sup> Teruyuki Kobayashi,<sup>a</sup> Takuya Noguchi,<sup>a</sup> Seisuke Mimori,<sup>a</sup> Masakiyo Hosokawa,<sup>a</sup> Takashi Fukui,<sup>b</sup> Akira Takagi,<sup>b</sup> Nobuaki Okumura,<sup>c</sup> Hiroshi Kawabe,<sup>c</sup> Takanori Yano,<sup>d</sup> Naomi Ohta,<sup>e</sup> Akihisa Hata,<sup>e</sup> Ryoji Mitsui,<sup>d</sup> Noboru Fujitani<sup>f</sup>

<sup>a</sup> Department of Pharmacy, Faculty of Pharmacy, Chiba Institute of Science, 15-8, Shiomi-cho, Choshi, Chiba 288-0025, Japan

<sup>b</sup> Department of Health and Medical Sciences, Faculty of Risk and Crisis Management, Chiba Institute of Science, 15-8 Shiomi, Choshi, Chiba 288-0025, Japan

<sup>c</sup> Institute for Bee Products and Health Science, Yamada Bee Company Inc., 194 Ichiba, Kagamincho, Tomata-gun, Okayama 708-0393, Japan

<sup>d</sup> Department of Bioscience, Faculty of Lifescience, Okayama University of Science, 1-1 Ridaicho, Kita-ku, Okayama-shi, Okayama 700-0005, Japan

<sup>e</sup> Faculty of Veterinary Medicine, Okayama University of Science, 1-3, Ikoinooka, Imabari, Ehime 797-8555, Japan

<sup>f</sup> Biomedical Science Examination and Research Center, Okayama University of Science, 1-3, Ikoinooka, Imabari, Ehime 797-8555, Japan

\*Corresponding author

Masato Takahashi, PhD

Faculty of Pharmacy, Chiba Institute of Science, 15-8, Shiomi-cho, Choshi, Chiba, 288-0025, Japan

Tel: +81 479 30 4680; E-mail: matakahashi@cis.ac.jp

### Contents

|                               |    |
|-------------------------------|----|
| General Information.....      | S4 |
| Synthesis of <b>23a</b> ..... | S4 |
| Synthesis of <b>23b</b> ..... | S4 |
| Synthesis of <b>23c</b> ..... | S5 |
| Synthesis of <b>23d</b> ..... | S5 |
| Synthesis of <b>23e</b> ..... | S6 |
| Synthesis of <b>24a</b> ..... | S6 |
| Synthesis of <b>24b</b> ..... | S6 |
| Synthesis of <b>24c</b> ..... | S7 |
| Synthesis of <b>24d</b> ..... | S7 |

|                                                                                               |     |
|-----------------------------------------------------------------------------------------------|-----|
| Synthesis of <b>24e</b> .....                                                                 | S8  |
| Synthesis of <b>6</b> .....                                                                   | S8  |
| Synthesis of <b>7</b> .....                                                                   | S8  |
| Synthesis of <b>8</b> .....                                                                   | S9  |
| Synthesis of <b>9</b> .....                                                                   | S9  |
| Synthesis of <b>10</b> .....                                                                  | S9  |
| Synthesis of <b>26a</b> .....                                                                 | S10 |
| Synthesis of <b>26b</b> .....                                                                 | S10 |
| Synthesis of <b>27a</b> .....                                                                 | S10 |
| Synthesis of <b>27b</b> .....                                                                 | S11 |
| Synthesis of <b>28a</b> .....                                                                 | S11 |
| Synthesis of <b>28b</b> .....                                                                 | S12 |
| Synthesis of <b>28c</b> .....                                                                 | S12 |
| Synthesis of <b>29a</b> .....                                                                 | S12 |
| Synthesis of <b>29b</b> .....                                                                 | S13 |
| Synthesis of <b>29c</b> .....                                                                 | S13 |
| Synthesis of <b>11</b> .....                                                                  | S14 |
| Synthesis of <b>12</b> .....                                                                  | S14 |
| Synthesis of <b>13</b> .....                                                                  | S14 |
| Synthesis of <b>31</b> .....                                                                  | S15 |
| Synthesis of <b>32</b> .....                                                                  | S15 |
| Synthesis of <b>1</b> .....                                                                   | S15 |
| Synthesis of <b>33</b> .....                                                                  | S16 |
| Synthesis of <b>34</b> .....                                                                  | S16 |
| Synthesis of <b>35</b> .....                                                                  | S16 |
| Synthesis of <b>14</b> .....                                                                  | S17 |
| Synthesis of <b>36</b> .....                                                                  | S17 |
| Synthesis of <b>37</b> .....                                                                  | S17 |
| Synthesis of <b>38</b> .....                                                                  | S18 |
| Synthesis of <b>17</b> .....                                                                  | S18 |
| Table S1. Comparison of the present polyamine synthesis with previously reported methods..... | S19 |
| NMR chart of <b>23a</b> .....                                                                 | S20 |
| NMR chart of <b>23b</b> .....                                                                 | S21 |
| NMR chart of <b>23c</b> .....                                                                 | S22 |
| NMR chart of <b>23d</b> .....                                                                 | S23 |
| NMR chart of <b>23e</b> .....                                                                 | S24 |
| NMR chart of <b>24a</b> .....                                                                 | S25 |
| NMR chart of <b>24b</b> .....                                                                 | S26 |

|                               |     |
|-------------------------------|-----|
| NMR chart of <b>24c</b> ..... | S27 |
| NMR chart of <b>24d</b> ..... | S28 |
| NMR chart of <b>24e</b> ..... | S29 |
| NMR chart of <b>6</b> .....   | S30 |
| NMR chart of <b>7</b> .....   | S31 |
| NMR chart of <b>8</b> .....   | S32 |
| NMR chart of <b>9</b> .....   | S33 |
| NMR chart of <b>10</b> .....  | S34 |
| NMR chart of <b>26a</b> ..... | S35 |
| NMR chart of <b>26b</b> ..... | S36 |
| NMR chart of <b>27a</b> ..... | S37 |
| NMR chart of <b>27b</b> ..... | S38 |
| NMR chart of <b>28a</b> ..... | S39 |
| NMR chart of <b>28b</b> ..... | S40 |
| NMR chart of <b>28c</b> ..... | S41 |
| NMR chart of <b>29a</b> ..... | S42 |
| NMR chart of <b>29b</b> ..... | S43 |
| NMR chart of <b>29c</b> ..... | S44 |
| NMR chart of <b>11</b> .....  | S45 |
| NMR chart of <b>12</b> .....  | S46 |
| NMR chart of <b>13</b> .....  | S47 |
| NMR chart of <b>31</b> .....  | S48 |
| NMR chart of <b>32</b> .....  | S49 |
| NMR chart of <b>1</b> .....   | S50 |
| NMR chart of <b>33</b> .....  | S51 |
| NMR chart of <b>34</b> .....  | S52 |
| NMR chart of <b>35</b> .....  | S53 |
| NMR chart of <b>14</b> .....  | S54 |
| NMR chart of <b>36</b> .....  | S55 |
| NMR chart of <b>37</b> .....  | S56 |
| NMR chart of <b>38</b> .....  | S57 |
| NMR chart of <b>17</b> .....  | S58 |

## General Information.

All reactions were carried out under ambient air unless otherwise noted. All reagents and solvents were of reagent grade and used without further purification. An oil bath was employed as the heating source for reactions requiring elevated temperatures. Unless otherwise stated, reaction mixtures were stirred using a magnetic stirrer. All organic solvents were removed under reduced pressure using a rotary evaporator. Yields are reported immediately prior to the subsequent reaction step and after recrystallization of the final products, unless otherwise noted.

$^1\text{H}$ - and  $^{13}\text{C}$  nuclear magnetic resonance (NMR) spectra were recorded on an Ascend<sup>TM</sup> 400 spectrometer (Bruker, MA, USA) in  $\text{CDCl}_3$ ,  $\text{DMSO-}d_6$ ,  $\text{CD}_3\text{OD}$ , or  $\text{D}_2\text{O}$ , as indicated. Chemical shifts ( $\delta$ ) are reported in parts per million (ppm). Residual solvent signals were used as internal references for spectra recorded in  $\text{CDCl}_3$  ( $\delta\text{H} = 7.26$  ppm,  $\delta\text{C} = 77.0$  ppm),  $\text{DMSO-}d_6$  ( $\delta\text{H} = 2.51$  ppm,  $\delta\text{C} = 39.5$  ppm), and  $\text{CD}_3\text{OD}$  ( $\delta\text{H} = 3.31$  ppm,  $\delta\text{C} = 49.0$  ppm). For spectra measured in  $\text{D}_2\text{O}$ , the residual HDO signal ( $\delta\text{H} = 4.79$  ppm) was used as the reference for  $^1\text{H}$  NMR; no internal reference was used for  $^{13}\text{C}$  NMR. Signal multiplicities are designated as follows: s = singlet, d = doublet, t = triplet, q = quartet, m = multiplet, dd = double doublet, dt = double triplet. High-resolution mass spectra (HRMS) were obtained using electrospray ionization (ESI) in positive/negative mode on a LIT-q-TOF tandem mass spectrometer (NanoFrontier LD) coupled to a liquid chromatograph (Hitachi High-Tech Corporation, Japan).

## Synthesis of **23a**

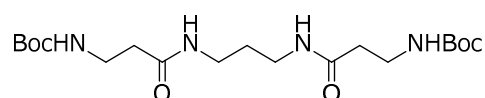

*di-tert-Butyl ((propane-1,3-diylbis(azanediyl))bis(3-oxopropane-3,1-diyl))dicarbamate (23a).* A mixture of *N*-Boc- $\beta$ -alanine (**21a**) (1135 mg, 6.0 mmol), propane-1,3-diamine (**22a**) (148 mg, 2.0 mmol), EDC·HCl (1150 mg, 6.0 mmol), and DMAP (24 mg, 0.2 mmol) in DMF (10 mL) was stirred at 50 °C for 3 h. After cooling in an ice bath, 5% aqueous  $\text{NaHCO}_3$  (30 mL) was added, stirred for 10 min at the same temperature, and the precipitate was collected by filtration using a Kiriya funnel and washed with hexane/ethyl acetate (10:1). The resulting colorless solid **23a** (802 mg, 96.3%) was used in the next step without further purification.  $^1\text{H}$  NMR (400 MHz,  $\text{CDCl}_3$ )  $\delta$  6.52 (br s, 2H), 5.28 (br s, 2H), 3.40 (dt,  $J = 6.0, 6.0$  Hz, 4H), 3.28 (dt,  $J = 6.0, 6.0$  Hz, 4H), 2.42 (t,  $J = 6.0$  Hz, 4H), 1.66–1.60 (m, 2H), 1.43 (s, 18H);  $^{13}\text{C}\{^1\text{H}\}$  NMR (100 MHz,  $\text{CDCl}_3$ )  $\delta$  172.0, 156.2, 79.4, 36.8, 36.5, 35.8, 29.5, 28.4; HRMS (ESI-TOF)  $m/z$  calcd for  $\text{C}_{19}\text{H}_{37}\text{N}_4\text{O}_6$   $[\text{M}+\text{H}]^+$  417.2708, found 417.2701.

## Synthesis of **23b**

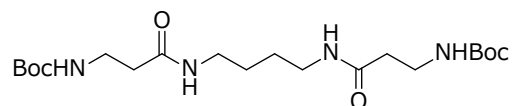

*di-tert-Butyl ((butane-1,4-diylbis(azanediyl))bis(3-oxopropane-3,1-diyl))dicarbamate (23b)*. A mixture of *N*-Boc- $\beta$ -alanine (**21a**) (1140 mg, 6.0 mmol), butane-1,4-diamine (**22b**) (176 mg, 2.0 mmol), EDC·HCl (1155 mg, 6.0 mmol), and DMAP (24 mg, 0.2 mmol) in DMF (10 mL) was stirred at 50 °C for 3 h. After cooling in an ice bath, 5% aqueous NaHCO<sub>3</sub> (30 mL) was added, stirred for 10 min at the same temperature, and the precipitate was collected by filtration using a Kiriyaama funnel and washed with hexane/ethyl acetate (10:1). The resulting colorless solid **23b** (833 mg, 96.7%) was used in the next step without further purification. <sup>1</sup>H NMR (400 MHz, DMSO-*d*<sub>6</sub>)  $\delta$  7.81 (t, *J* = 5.2 Hz, 2H), 6.73 (t, *J* = 5.2 Hz, 2H), 3.11 (dt, *J* = 6.8, 6.8 Hz, 4H), 3.02–3.01 (m, 4H), 2.20 (t, *J* = 7.2 Hz, 4H), 1.40–1.35 (m, 22H); <sup>13</sup>C{<sup>1</sup>H} NMR (100 MHz, DMSO-*d*<sub>6</sub>)  $\delta$  170.1, 155.4, 77.5, 38.1, 36.8, 35.8, 28.2, 26.5; HRMS (ESI-TOF) *m/z* calcd for C<sub>20</sub>H<sub>39</sub>N<sub>4</sub>O<sub>6</sub> [M+H]<sup>+</sup> 431.2864, found 431.2865.

#### Synthesis of **23c**

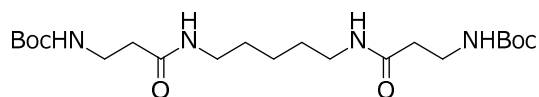

*di-tert-Butyl ((pentane-1,5-diylbis(azanediyl))bis(3-oxopropane-3,1-diyl))dicarbamate (23c)*. A mixture of *N*-Boc- $\beta$ -alanine (**21a**) (1137 mg, 6.0 mmol), pentane-1,5-diamine (**22c**) (204 mg, 2.0 mmol), EDC·HCl (1149 mg, 6.0 mmol), and DMAP (24 mg, 0.2 mmol) in DMF (10 mL) was stirred at 50 °C for 3 h. After cooling in an ice bath, 5% aqueous NaHCO<sub>3</sub> (30 mL) was added, stirred for 10 min at the same temperature, and the precipitate was collected by filtration using a Kiriyaama funnel and washed with hexane/ethyl acetate (10:1). The resulting colorless solid **23c** (871 mg, 98.0%) was used in the next step without further purification. <sup>1</sup>H NMR (400 MHz, CDCl<sub>3</sub>)  $\delta$  6.13 (br s, 2H), 5.34 (br s, 2H), 3.39 (dt, *J* = 6.0, 6.0 Hz, 4H), 3.25 (dt, *J* = 6.0, 6.0 Hz, 4H), 2.40 (t, *J* = 6.0 Hz, 4H), 1.55–1.48 (m, 4H), 1.42 (s, 18H), 1.37–1.30 (m, 2H); <sup>13</sup>C{<sup>1</sup>H} NMR (100 MHz, CDCl<sub>3</sub>)  $\delta$  171.5, 156.3, 79.3, 39.0, 36.8, 36.4, 28.9, 28.4, 23.7; HRMS (ESI-TOF) *m/z* calcd for C<sub>21</sub>H<sub>41</sub>N<sub>4</sub>O<sub>6</sub> [M+H]<sup>+</sup> 445.3021, found 445.3027.

#### Synthesis of **23d**

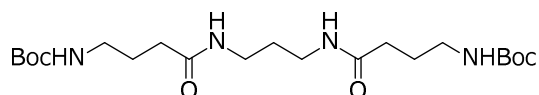

*di-tert-Butyl ((propane-1,3-diylbis(azanediyl))bis(4-oxobutane-4,1-diyl))dicarbamate (23d)*. A mixture of *N*-Boc- $\gamma$ -aminobutyric acid (**21b**) (1219 mg, 6.0 mmol), propane-1,3-diamine (**22a**) (148 mg, 2.0 mmol), EDC·HCl (1150 mg, 6.0 mmol), and DMAP (24 mg, 0.2 mmol) in DMF (10 mL) was stirred at 50 °C for 3 h. After cooling in an ice bath, 5% aqueous NaHCO<sub>3</sub> (30 mL) was added, stirred for 10 min at the same temperature, and the precipitate was collected by filtration using a Kiriyaama funnel and washed with hexane/diethyl ether (10:1). The resulting colorless solid **23d** (866 mg, 97.4%) was used in the next step without further purification. <sup>1</sup>H NMR (400 MHz, CDCl<sub>3</sub>)  $\delta$  6.81 (br s, 2H),

4.88 (br s, 2H), 3.28 (dt,  $J = 6.0$ , 6.0 Hz, 4H), 3.18 (dt,  $J = 6.0$ , 6.0 Hz, 4H), 2.24 (t,  $J = 7.2$  Hz, 4H), 1.84–1.77 (m, 4H), 1.68–1.62 (m, 2H), 1.43 (s, 18H);  $^{13}\text{C}\{^1\text{H}\}$  NMR (100 MHz,  $\text{CDCl}_3$ )  $\delta$  173.2, 156.3, 78.9, 39.7, 35.9, 33.5, 29.3, 28.2, 26.1; HRMS (ESI-TOF)  $m/z$  calcd for  $\text{C}_{21}\text{H}_{41}\text{N}_4\text{O}_6$   $[\text{M}+\text{H}]^+$  445.3021, found 445.3026.

#### Synthesis of **23e**

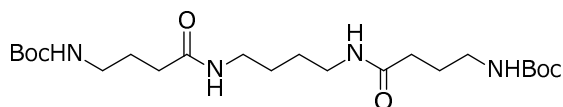

*di-tert-Butyl ((butane-1,4-diylbis(azanediyl))bis(4-oxobutane-4,1-diyl))dicarbamate (23e)*. A mixture of *N*-Boc- $\gamma$ -aminobutyric acid (**21b**) (1220 mg, 6.0 mmol), butane-1,4-diamine (**22b**) (176 mg, 2.0 mmol), EDC·HCl (1150 mg, 6.0 mmol), and DMAP (24 mg, 0.2 mmol) in DMF (10 mL) was stirred at 50 °C for 3 h. After cooling in an ice bath, 5% aqueous  $\text{NaHCO}_3$  (30 mL) was added, stirred for 10 min at the same temperature, and the precipitate was collected by filtration using a Kiriya funnel and washed with hexane/ethyl acetate (10:1). The resulting colorless solid **23e** (909 mg, 99.1%) was used in the next step without further purification.  $^1\text{H}$  NMR (400 MHz,  $\text{CDCl}_3$ )  $\delta$  6.63 (br s, 2H), 4.93 (br s, 2H), 3.27 (dt,  $J = 6.0$ , 6.0 Hz, 4H), 3.15 (dt,  $J = 6.0$ , 6.0 Hz, 4H), 2.22 (t,  $J = 6.8$  Hz, 4H), 1.83–1.77 (m, 4H), 1.58–1.52 (m, 4H), 1.43 (s, 18H);  $^{13}\text{C}\{^1\text{H}\}$  NMR (100 MHz,  $\text{CDCl}_3$ )  $\delta$  172.9, 156.5, 79.3, 39.7, 39.0, 33.6, 28.4, 26.7, 26.4; HRMS (ESI-TOF)  $m/z$  calcd for  $\text{C}_{22}\text{H}_{43}\text{N}_4\text{O}_6$   $[\text{M}+\text{H}]^+$  459.3177, found 459.3179.

#### Synthesis of **24a**

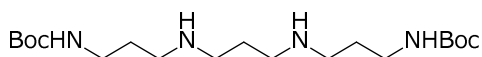

*di-tert-Butyl ((propane-1,3-diylbis(azanediyl))bis(3-oxopropane-3,1-diyl))dicarbamate (24a)*. A 3.6 M solution of Red-Al in toluene (2.0 mL, 7.2 mmol) was slowly added to a solution of diamide **23a** (250 mg, 0.6 mmol) in toluene/THF (2:1, 10 mL) at 0 °C. The reaction mixture was stirred at 40 °C for 3 h. After cooling to 0 °C, 1.0 M aqueous NaOH (10 mL) was added slowly. The mixture was stirred for 5 min and extracted with toluene (20 mL). The organic layer was washed with  $\text{H}_2\text{O}$  (5 mL) and brine (5 mL), dried over  $\text{MgSO}_4$ , filtered, and concentrated under reduced pressure. The resulting colorless solid **24a** (227 mg, 97.1%) was used in the next step without further purification.  $^1\text{H}$  NMR (400 MHz,  $\text{CDCl}_3$ )  $\delta$  5.20 (br s, 2H), 3.16–3.12 (m, 4H), 2.62–2.59 (m, 8H), 1.64–1.54 (m, 6H), 1.39 (s, 20H);  $^{13}\text{C}\{^1\text{H}\}$  NMR (100 MHz,  $\text{CDCl}_3$ )  $\delta$  156.0, 78.8, 48.2, 47.7, 39.1, 30.2, 29.8, 28.4; HRMS (ESI-TOF)  $m/z$  calcd for  $\text{C}_{19}\text{H}_{41}\text{N}_4\text{O}_4$   $[\text{M}+\text{H}]^+$  389.3122, found 389.3117.

#### Synthesis of **24b**

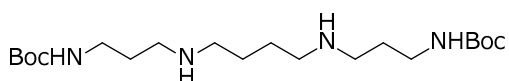

*di-tert-Butyl ((butane-1,4-diylbis(azanediyl))bis(propane-3,1-diyl))dicarbamate (24b)*. A 3.6 M solution of Red-Al in toluene (1.3 mL, 4.7 mmol) was slowly added to a solution of diamide **23b** (172 mg, 0.4 mmol) in toluene/THF (2:1, 10 mL) at 0 °C. The reaction mixture was stirred at 40 °C for 3 h. After cooling to 0 °C, 1.0 M aqueous NaOH (10 mL) was added slowly. The mixture was stirred for 5 min and extracted with toluene (20 mL). The organic layer was washed with H<sub>2</sub>O (5 mL) and brine (5 mL), dried over MgSO<sub>4</sub>, filtered, and concentrated under reduced pressure. The resulting colorless oil **24b** (143 mg, 89.0%) was used in the next step without further purification. <sup>1</sup>H NMR (400 MHz, CDCl<sub>3</sub>) δ 5.21 (br s, 2H), 3.16–3.11 (m, 4H), 2.60 (t, *J* = 6.8 Hz, 4H), 2.57–2.52 (m, 4H), 1.62–1.55 (m, 4H), 1.47–1.44 (m, 4H), 1.38 (s, 18H); NH protons (2H) were not observed; <sup>13</sup>C{<sup>1</sup>H} NMR (100 MHz, CDCl<sub>3</sub>) δ 156.0, 78.8, 49.7, 47.6, 39.1, 29.8, 28.3, 27.7; HRMS (ESI-TOF) *m/z* calcd for C<sub>20</sub>H<sub>43</sub>N<sub>4</sub>O<sub>4</sub> [M+H]<sup>+</sup> 403.3279, found 403.3274.

#### Synthesis of **24c**

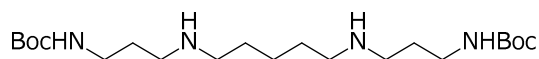

*di-tert-Butyl ((pentane-1,5-diylbis(azanediyl))bis(propane-3,1-diyl))dicarbamate (24c)*. A 3.6 M solution of Red-Al in toluene (2.0 mL, 7.2 mmol) was slowly added to a solution of diamide **23c** (267 mg, 0.6 mmol) in toluene/THF (2:1, 10 mL) at 0 °C. The reaction mixture was stirred at 40 °C for 3 h. After cooling to 0 °C, 1.0 M aqueous NaOH (10 mL) was added slowly. The mixture was stirred for 5 min and extracted with toluene (20 mL). The organic layer was washed with H<sub>2</sub>O (5 mL) and brine (5 mL), dried over MgSO<sub>4</sub>, filtered, and concentrated under reduced pressure. The resulting pale yellow oil **24c** (234 mg, 93.7%) was used in the next step without further purification. <sup>1</sup>H NMR (400 MHz, CDCl<sub>3</sub>) δ 5.24 (br s, 2H), 3.13–3.12 (m, 4H), 2.59 (t, *J* = 6.8 Hz, 4H), 2.53–2.50 (m, 4H), 1.61–1.53 (m, 4H), 1.47–1.38 (m, 24H); NH protons (2H) were not observed; <sup>13</sup>C{<sup>1</sup>H} NMR (100 MHz, CDCl<sub>3</sub>) δ 156.0, 78.7, 49.7, 47.7, 39.1, 29.9, 29.8, 28.3, 24.9; HRMS (ESI-TOF) *m/z* calcd for C<sub>21</sub>H<sub>45</sub>N<sub>4</sub>O<sub>4</sub> [M+H]<sup>+</sup> 417.3435, found 417.3438.

#### Synthesis of **24d**

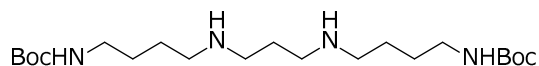

*di-tert-Butyl ((propane-1,3-diylbis(azanediyl))bis(butane-4,1-diyl))dicarbamate (24d)*. A 3.6 M solution of Red-Al in toluene (2.0 mL, 7.2 mmol) was slowly added to a solution of diamide **23d** (267 mg, 0.6 mmol) in toluene/THF (2:1, 10 mL) at 0 °C. The reaction mixture was stirred at 40 °C for 3 h. After cooling to 0 °C, 1.0 M aqueous NaOH (10 mL) was added slowly. The mixture was stirred for 5 min and extracted with toluene (20 mL). The organic layer was washed with H<sub>2</sub>O (5 mL) and brine (5 mL), dried over MgSO<sub>4</sub>, filtered, and concentrated under reduced pressure. The resulting colorless oil **24d** (245 mg, 98.1%) was used in the next step without further purification. <sup>1</sup>H NMR (400 MHz, CDCl<sub>3</sub>) δ 5.01 (br s, 2H), 3.04–3.02 (m, 4H), 2.57 (t, *J* = 6.4 Hz, 4H), 2.54–2.48 (m, 4H), 1.62–1.55

(m, 2H), 1.43–1.42 (m, 8H), 1.35 (s, 18H); NH protons (2H) were not observed;  $^{13}\text{C}\{^1\text{H}\}$  NMR (100 MHz,  $\text{CDCl}_3$ )  $\delta$  155.9, 78.7, 49.4, 48.3, 40.3, 30.1, 28.3, 27.8, 27.3; HRMS (ESI-TOF)  $m/z$  calcd for  $\text{C}_{21}\text{H}_{45}\text{N}_4\text{O}_4$   $[\text{M}+\text{H}]^+$  417.3435, found 417.3434.

#### Synthesis of **24e**

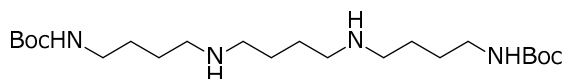

*di-tert-Butyl ((butane-1,4-diylbis(azanediyl))bis(butane-4,1-diyl))dicarbamate (24e)*. A 3.6 M solution of Red-Al in toluene (2.0 mL, 7.2 mmol) was slowly added to a solution of diamide **23e** (275 mg, 0.6 mmol) in toluene/THF (2:1, 10 mL) at 0 °C. The reaction mixture was stirred at 40 °C for 3 h. After cooling to 0 °C, 1.0 M aqueous NaOH (10 mL) was added slowly. The mixture was stirred for 5 min and extracted with toluene (20 mL). The organic layer was washed with  $\text{H}_2\text{O}$  (5 mL) and brine (5 mL), dried over  $\text{MgSO}_4$ , filtered, and concentrated under reduced pressure. The resulting colorless solid **24e** (225 mg, 87.2%) was used in the next step without further purification.  $^1\text{H}$  NMR (400 MHz,  $\text{CDCl}_3$ )  $\delta$  5.01 (br s, 2H), 3.04–3.03 (m, 4H), 2.54–2.49 (m, 8H), 1.47–1.39 (m, 12H), 1.36 (s, 18H); NH protons (2H) were not observed;  $^{13}\text{C}\{^1\text{H}\}$  NMR (100 MHz,  $\text{CDCl}_3$ )  $\delta$  155.9, 78.7, 49.6, 49.3, 40.3, 28.3, 27.74, 27.68, 27.2; HRMS (ESI-TOF)  $m/z$  calcd for  $\text{C}_{22}\text{H}_{47}\text{N}_4\text{O}_4$   $[\text{M}]^+$  431.3592, found 431.3591.

#### Synthesis of **6**

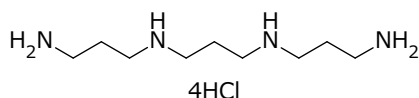

*Norspermine tetrahydrochloride (6)*. A 4.0 M solution of HCl in 1,4-dioxane (0.75 mL, 3.0 mmol) was added to a solution of the di-Boc compound **24a** (116 mg, 0.3 mmol) in 1,4-dioxane (5.0 mL) at 0 °C. The reaction mixture was stirred at 50 °C for 3 h. After removal of the solvent under reduced pressure, the crude residue was recrystallized from MeOH to afford a colorless solid **6** (73 mg, 73.3%).  $^1\text{H}$  NMR (400 MHz,  $\text{D}_2\text{O}$ )  $\delta$  3.21 (m, 8H), 3.13 (m, 4H), 2.20–2.08 (m, 6H);  $^{13}\text{C}\{^1\text{H}\}$  NMR (100 MHz,  $\text{D}_2\text{O}$ )  $\delta$  44.7, 44.6, 36.6, 23.7, 22.7; HRMS (ESI-TOF)  $m/z$  calcd for  $\text{C}_9\text{H}_{25}\text{N}_4$   $[\text{M}+\text{H}]^+$  189.2074, found 189.2072.

#### Synthesis of **7**

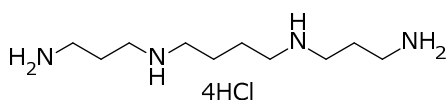

*Spermine tetrahydrochloride (7)*. A 4.0 M solution of HCl in 1,4-dioxane (0.75 mL, 3.0 mmol) was added to a solution of the di-Boc compound **24b** (121 mg, 0.3 mmol) in 1,4-dioxane (5.0 mL) at 0 °C. The reaction mixture was stirred at 50 °C for 3 h. After removal of the solvent under reduced pressure, the crude residue was recrystallized from MeOH to afford a colorless solid **7** (58 mg, 55.7%).  $^1\text{H}$  NMR



(400 MHz, D<sub>2</sub>O)  $\delta$  3.18–3.09 (m, 12H), 2.13–2.06 (m, 4H), 1.85–1.74 (m, 4H); <sup>13</sup>C{<sup>1</sup>H} NMR (100 MHz, D<sub>2</sub>O)  $\delta$  47.0, 44.6, 36.6, 23.8, 22.8; HRMS (ESI-TOF)  $m/z$  calcd for C<sub>10</sub>H<sub>27</sub>N<sub>4</sub> [M+H]<sup>+</sup> 203.2230, found 203.2228.

#### Synthesis of **8**

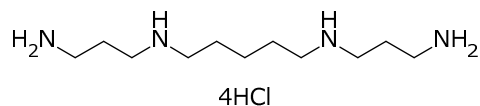

*bis(Aminopropyl)cadaverine tetrahydrochloride (8)*. A 4.0 M solution of HCl in 1,4-dioxane (0.75 mL, 3.0 mmol) was added to a solution of the di-Boc compound **24c** (125 mg, 0.3 mmol) in 1,4-dioxane (5.0 mL) at 0 °C. The reaction mixture was stirred at 50 °C for 12 h. After removal of the solvent under reduced pressure, the crude residue was recrystallized from MeOH to afford a colorless solid **8** (78 mg, 71.4%). <sup>1</sup>H NMR (400 MHz, D<sub>2</sub>O)  $\delta$  3.18–3.07 (m, 12H), 2.14–2.06 (m, 4H), 1.78–1.71 (m, 4H), 1.51–1.43 (m, 2H); <sup>13</sup>C{<sup>1</sup>H} NMR (100 MHz, D<sub>2</sub>O)  $\delta$  47.5, 44.5, 36.6, 25.1, 23.8, 22.8; HRMS (ESI-TOF)  $m/z$  calcd for C<sub>11</sub>H<sub>29</sub>N<sub>4</sub> [M+H]<sup>+</sup> 217.2387, found 217.2389.

#### Synthesis of **9**

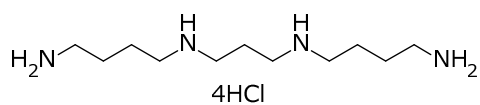

*Canavalmine tetrahydrochloride (9)*. A 4.0 M solution of HCl in 1,4-dioxane (0.75 mL, 3.0 mmol) was added to a solution of the di-Boc compound **24d** (208 mg, 0.5 mmol) in 1,4-dioxane (5.0 mL) at 0 °C. The reaction mixture was stirred at 50 °C for 3 h. After removal of the solvent under reduced pressure, the crude residue was recrystallized from MeOH to afford a colorless solid **9** (76 mg, 70.1%). <sup>1</sup>H NMR (400 MHz, D<sub>2</sub>O)  $\delta$  3.19–3.04 (m, 12H), 2.17–2.09 (m, 2H), 1.85–1.70 (m, 8H); <sup>13</sup>C{<sup>1</sup>H} NMR (100 MHz, D<sub>2</sub>O)  $\delta$  47.1, 44.5, 38.8, 23.9, 22.8, 22.7; HRMS (ESI-TOF)  $m/z$  calcd for C<sub>11</sub>H<sub>29</sub>N<sub>4</sub> [M+H]<sup>+</sup> 217.2387, found 217.2389.

#### Synthesis of **10**

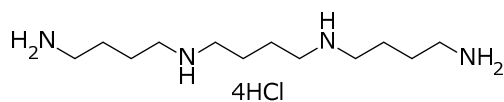

*Homospermine tetrahydrochloride (10)*. A 4.0 M solution of HCl in 1,4-dioxane (1.0 mL, 4.0 mmol) was added to a solution of the di-Boc compound **24e** (172 mg, 0.4 mmol) in 1,4-dioxane (3.0 mL) at 0 °C. The reaction mixture was stirred at 50 °C for 3 h. After removal of the solvent under reduced pressure, the crude residue was recrystallized from MeOH to afford a colorless solid **10** (100 mg, 66.6%). <sup>1</sup>H NMR (400 MHz, D<sub>2</sub>O)  $\delta$  3.12–3.03 (m, 12H), 1.83–1.82 (m, 12H); <sup>13</sup>C{<sup>1</sup>H} NMR (100 MHz, D<sub>2</sub>O)  $\delta$  46.9, 46.9, 38.8, 23.9, 22.80, 22.76; HRMS (ESI-TOF)  $m/z$  calcd for C<sub>12</sub>H<sub>31</sub>N<sub>4</sub> [M+H]<sup>+</sup>

231.2543, found 231.2548.

### Synthesis of **26a**

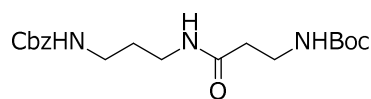

*tert*-Butyl (3-((3-(((benzyloxy)carbonyl)amino)propyl)amino)-3-oxopropyl)carbamate (**26a**). A mixture of *N*-Cbz-propane-1,3-diamine hydrochloride (**25a**) (734 mg, 3.0 mmol), *N*-Boc- $\beta$ -alanine (**21a**) (851 mg, 4.5 mmol), EDC·HCl (863 mg, 4.5 mmol), and DMAP (36 mg, 0.3 mmol) in Et<sub>3</sub>N (0.6 mL, 4.3 mmol), DMF (10 mL) was stirred at 50 °C for 3 h. After cooling in an ice bath, 5% aqueous NaHCO<sub>3</sub> (30 mL) was added, stirred for 10 min at the same temperature, and the precipitate was collected by filtration using a Kiriyaama funnel and washed with hexane/diethyl ether (10:1). The resulting colorless solid **26a** (1086 mg, 95.4%) was used in the next step without further purification. <sup>1</sup>H NMR (400 MHz, CDCl<sub>3</sub>)  $\delta$  7.36–7.30 (m, 5H), 6.30 (br s, 1H), 5.29 (br s, 1H), 5.19 (br s, 1H), 5.10 (s, 2H), 3.41–3.21 (m, 6H), 2.41–2.39 (m, 2H), 1.67–1.61 (m, 2H), 1.43 (s, 9H); <sup>13</sup>C{<sup>1</sup>H} NMR (100 MHz, CDCl<sub>3</sub>)  $\delta$  171.9, 157.0, 156.2, 136.5, 128.5, 128.1, 128.0, 79.4, 66.7, 37.6, 36.7, 36.3, 35.9, 29.8, 28.3; HRMS (ESI-TOF)  $m/z$  calcd for C<sub>19</sub>H<sub>30</sub>N<sub>3</sub>O<sub>5</sub> [M+H]<sup>+</sup> 380.2180, found 380.2183.

### Synthesis of **26b**

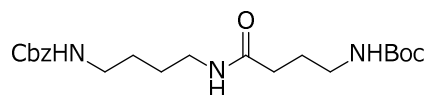

*tert*-Butyl (4-((4-(((benzyloxy)carbonyl)amino)butyl)amino)-4-oxobutyl)carbamate (**26b**). A mixture of *N*-Cbz-butane-1,4-diamine hydrochloride (**25b**) (776 mg, 3.0 mmol), *N*-Boc- $\gamma$ -aminobutyric acid (**21b**) (915 mg, 4.5 mmol), EDC·HCl (863 mg, 4.5 mmol), and DMAP (36 mg, 0.3 mmol) in Et<sub>3</sub>N (0.6 mL, 4.3 mmol), DMF (10 mL) was stirred at 50 °C for 3 h. After cooling in an ice bath, 5% aqueous NaHCO<sub>3</sub> (30 mL) was added, stirred for 10 min at the same temperature, and the precipitate was collected by filtration using a Kiriyaama funnel and washed with hexane/diethyl ether (10:1). The resulting colorless solid **26b** (1163 mg, 95.1%) was used in the next step without further purification. <sup>1</sup>H NMR (400 MHz, CDCl<sub>3</sub>)  $\delta$  7.38–7.29 (m, 5H), 6.32 (br s, 1H), 5.09 (s, 2H), 4.98 (br s, 1H), 4.78 (br s, 1H), 3.28–3.13 (m, 6H), 2.20 (t,  $J$  = 6.8 Hz, 2H), 1.82–1.76 (m, 2H), 1.58–1.52 (m, 4H), 1.43 (s, 9H); <sup>13</sup>C{<sup>1</sup>H} NMR (100 MHz, CDCl<sub>3</sub>)  $\delta$  172.7, 156.5 (2C), 136.6, 128.5 (2C), 128.1, 79.4, 66.6, 40.6, 39.6, 39.0, 33.6, 28.4, 27.3, 26.6, 26.5; HRMS (ESI-TOF)  $m/z$  calcd for C<sub>21</sub>H<sub>34</sub>N<sub>3</sub>O<sub>5</sub> [M+H]<sup>+</sup> 408.2493, found 408.2487.

### Synthesis of **27a**

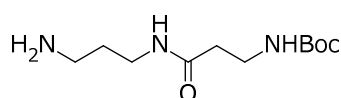

*tert*-Butyl (3-((3-aminopropyl)amino)-3-oxopropyl)carbamate (**27a**). A mixture of amide **26a** (759 mg, 2.0 mmol) and 10% Pd/C (76 mg, 10 wt%) in MeOH (10 mL) was stirred at room temperature for 5 h under hydrogen atmosphere. The mixture was filtered through Celite and concentrated under reduced pressure to give the desired compound as a colorless solid **27a** (487 mg, 99.3%), which was used in the next step without further purification. <sup>1</sup>H NMR (400 MHz, CDCl<sub>3</sub>) δ 7.00 (br s, 1H), 5.43 (br s, 1H), 3.33–3.24 (m, 4H), 2.71 (t, *J* = 6.4 Hz, 2H), 2.32 (t, *J* = 6.0 Hz, 2H), 1.61–1.51 (m, 4H), 1.35 (s, 9H); <sup>13</sup>C{<sup>1</sup>H} NMR (100 MHz, CDCl<sub>3</sub>) δ 171.4, 156.1, 79.0, 39.8, 37.5, 36.7, 36.2, 32.1, 28.3; HRMS (ESI-TOF) *m/z* calcd for C<sub>11</sub>H<sub>24</sub>N<sub>3</sub>O<sub>3</sub> [M+H]<sup>+</sup> 246.1812, found 246.1816.

#### Synthesis of **27b**

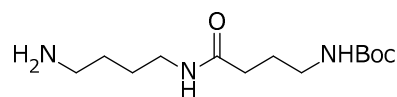

*tert*-Butyl (4-((4-aminobutyl)amino)-4-oxobutyl)carbamate (**27b**). A mixture of amide **26b** (815 mg, 2.0 mmol) and 10% Pd/C (76 mg, 10 wt%) in MeOH (10 mL) was stirred at room temperature for 5 h under hydrogen atmosphere. The mixture was filtered through Celite and concentrated under reduced pressure to give the desired compound as a colorless solid **27b** (543 mg, 99.3%), which was used in the next step without further purification. <sup>1</sup>H NMR (400 MHz, CDCl<sub>3</sub>) δ 6.82 (br s, 1H), 4.98 (br s, 1H), 3.28–2.70 (m, 8H), 2.20 (t, *J* = 6.8 Hz, 2H), 1.81–1.74 (m, 2H), 1.60–1.50 (m, 4H), 1.41 (s, 9H); <sup>13</sup>C{<sup>1</sup>H} NMR (100 MHz, CDCl<sub>3</sub>) δ 172.8, 156.5, 79.3, 41.2, 39.8, 39.2, 33.6, 29.7, 28.4, 26.8, 26.4; HRMS (ESI-TOF) *m/z* calcd for C<sub>13</sub>H<sub>28</sub>N<sub>3</sub>O<sub>3</sub> [M+H]<sup>+</sup> 274.2125, found 274.2127.

#### Synthesis of **28a**

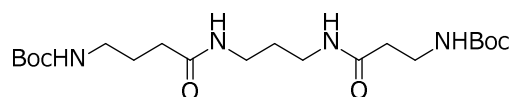

*tert*-Butyl (2,2-dimethyl-4,8,14-trioxo-3-oxa-5,9,13-triazaheptadecan-17-yl)carbamate (**28a**). A mixture of amine **27a** (487 mg, 2.0 mmol), *N*-Boc-4-aminobutylic acid (**21b**) (610 mg, 3.0 mmol), EDC·HCl (575 mg, 3.0 mmol), and DMAP (24 mg, 0.2 mmol) in DMF (10 mL) was stirred at 50 °C for 3 h. After cooling in an ice bath, 5% aqueous NaHCO<sub>3</sub> (30 mL) was added, stirred for 10 min at the same temperature, and the precipitate was collected by filtration using a Kiriya funnel and washed with hexane/ethyl acetate (10:1). The resulting colorless solid **28a** (820 mg, 95.3%) was used in the next step without further purification. <sup>1</sup>H NMR (400 MHz, CDCl<sub>3</sub>) δ 6.92–6.85 (m, 2H), 5.33 (br s, 1H), 4.99 (br s, 1H), 3.37–3.34 (m, 2H), 3.25–3.24 (m, 4H), 3.13–3.12 (m, 2H), 2.41–2.20 (m, 4H), 1.81–1.75 (m, 2H), 1.64–1.61 (m, 2H), 1.41 (s, 18H); <sup>13</sup>C{<sup>1</sup>H} NMR (100 MHz, CDCl<sub>3</sub>) δ 173.4, 172.0, 156.5, 156.2, 79.3 (2C), 39.7, 36.8, 36.4, 35.9, 33.6, 29.5, 29.4, 28.4 (2C), 26.3; HRMS (ESI-TOF) *m/z* calcd for C<sub>20</sub>H<sub>39</sub>N<sub>4</sub>O<sub>6</sub> [M+H]<sup>+</sup> 431.2864, found 431.2859.

### Synthesis of **28b**

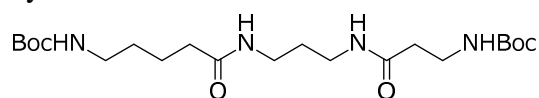

*tert-Butyl (2,2-dimethyl-4,8,14-trioxo-3-oxa-5,9,13-triazaoctadecan-18-yl)carbamate (28b).* A mixture of amine **27a** (491 mg, 2.0 mmol), *N*-Boc-5-aminopentanoic acid (**21c**) (652 mg, 3.0 mmol), EDC·HCl (575 mg, 3.0 mmol), and DMAP (24 mg, 0.2 mmol) in DMF (10 mL) was stirred at 50 °C for 3 h. After cooling in an ice bath, 5% aqueous NaHCO<sub>3</sub> (30 mL) was added, stirred for 10 min at the same temperature, and the precipitate was collected by filtration using a Kiriya funnel and washed with hexane/ethyl acetate (10:1). The resulting colorless solid **28b** (852 mg, 95.8%) was used in the next step without further purification. <sup>1</sup>H NMR (400 MHz, CDCl<sub>3</sub>) δ 6.68 (br s, 1H), 6.45 (br s, 1H), 5.27 (br s, 1H), 4.78 (br s, 1H), 3.41–3.10 (m, 8H), 2.43–2.40 (m, 2H), 2.24–2.21 (m, 2H), 1.70–1.58 (m, 4H), 1.54–1.42 (m, 20H); <sup>13</sup>C{<sup>1</sup>H} NMR (100 MHz, CDCl<sub>3</sub>) δ 173.6, 172.0, 156.19, 156.15, 79.3, 79.2, 39.8, 36.7, 36.4, 35.9, 35.8, 29.62, 29.58, 29.5, 28.39, 28.37, 22.7; HRMS (ESI-TOF) *m/z* calcd for C<sub>21</sub>H<sub>41</sub>N<sub>4</sub>O<sub>6</sub> [M+H]<sup>+</sup> 445.3021, found 445.3013.

### Synthesis of **28c**

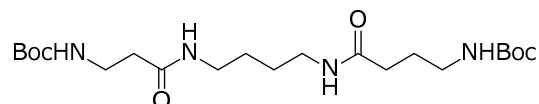

*tert-Butyl (2,2-dimethyl-4,8,15-trioxo-3-oxa-5,9,14-triazaoctadecan-18-yl)carbamate (28c).* A mixture of amine **27b** (543 mg, 2.0 mmol), *N*-Boc-β-alanine (**21a**) (566 mg, 3.0 mmol), EDC·HCl (575 mg, 3.0 mmol), and DMAP (24 mg, 0.2 mmol) in DMF (10 mL) was stirred at 50 °C for 3 h. After cooling in an ice bath, 5% aqueous NaHCO<sub>3</sub> (30 mL) was added, stirred for 10 min at the same temperature, and the precipitate was collected by filtration using a Kiriya funnel and washed with hexane/ethyl acetate (10:1). The resulting colorless solid **28c** (847 mg, 95.3%) was used in the next step without further purification. <sup>1</sup>H NMR (400 MHz, CDCl<sub>3</sub>) δ 6.77–6.68 (m, 2H), 5.36 (br s, 1H), 5.05 (br s, 1H), 3.36–3.10 (m, 8H), 2.41–2.13 (m, 4H), 1.81–1.70 (m, 2H), 1.54–1.32 (m, 22H); <sup>13</sup>C{<sup>1</sup>H} NMR (100 MHz, CDCl<sub>3</sub>) δ 172.9, 171.7, 156.5, 156.2, 79.2 (2C), 39.7, 38.9 (2C), 36.8, 36.2, 33.5 (2C), 28.3, 26.8, 26.6, 26.4; HRMS (ESI-TOF) *m/z* calcd for C<sub>21</sub>H<sub>41</sub>N<sub>4</sub>O<sub>6</sub> [M+H]<sup>+</sup> 445.3021, found 445.3013.

### Synthesis of **29a**

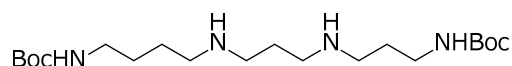

*tert-Butyl (2,2-dimethyl-4-oxo-3-oxa-5,10,14-triazaheptadecan-17-yl)carbamate (29a).* A 3.6 M solution of Red-Al in toluene (5.0 mL, 18 mmol) was slowly added to a solution of diamide **28a** (431 mg, 1.0 mmol) in toluene/THF (2:1, 10 mL) at 0 °C. The reaction mixture was stirred at 40 °C for 3 h. After cooling to 0 °C, 1 M aqueous NaOH (10 mL) was added slowly. The mixture was stirred for 5

min and extracted with toluene (20 mL). The organic layer was washed with H<sub>2</sub>O (10 mL) and brine (5 mL), dried over MgSO<sub>4</sub>, filtered, and concentrated under reduced pressure. The resulting colorless solid (353 mg, 87.6%) was used in the next step without further purification. <sup>1</sup>H NMR (400 MHz, CDCl<sub>3</sub>) δ 5.25 (br s, 1H), 5.04 (br s, 1H), 3.12–3.00 (m, 4H), 2.58–2.50 (m, 8H), 1.60–1.52 (m, 4H), 1.43–1.34 (m, 22H); NH protons (2H) were not observed; <sup>13</sup>C{<sup>1</sup>H} NMR (100 MHz, CDCl<sub>3</sub>) δ 155.94, 155.89, 78.6 (2C), 49.4, 48.21, 48.19, 47.6, 40.3, 39.0, 30.1, 29.8, 28.3 (2C), 27.7, 27.3; HRMS (ESI-TOF) *m/z* calcd for C<sub>20</sub>H<sub>43</sub>N<sub>4</sub>O<sub>4</sub> [M+H]<sup>+</sup> 403.3279, found 403.3272.

#### Synthesis of **29b**

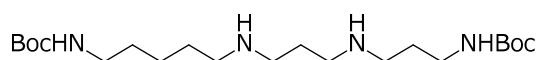

*tert*-butyl (2,2-dimethyl-4-oxo-3-oxa-5,9,13-triazaoctadecan-18-yl)carbamate (**29b**). A 3.6 M solution of Red-Al in toluene (5.0 mL, 18 mmol) was slowly added to a solution of diamide **28b** (445 mg, 1.0 mmol) in toluene/THF (2:1, 20 mL) at 0 °C. The reaction mixture was stirred at 40 °C for 3 h. After cooling to 0 °C, 1 M aqueous NaOH (10 mL) was added slowly. The mixture was stirred for 5 min and extracted with toluene (20 mL). The organic layer was washed with H<sub>2</sub>O (10 mL) and brine (10 mL), dried over MgSO<sub>4</sub>, filtered, and concentrated under reduced pressure. The resulting colorless solid (395 mg, 94.9%) was used in the next step without further purification. <sup>1</sup>H NMR (400 MHz, CDCl<sub>3</sub>) δ 5.19 (br s, 1H), 4.66 (br s, 1H), 3.15–3.06 (m, 4H), 2.63–2.50 (m, 8H), 1.69–1.51 (m, 4H), 1.45–1.33 (m, 24H); NH protons (2H) were not observed; <sup>13</sup>C{<sup>1</sup>H} NMR (100 MHz, CDCl<sub>3</sub>) δ 156.1, 156.0, 78.9, 78.8, 49.8, 48.3 (2C), 47.6, 40.4, 39.1, 30.2, 29.9 (2C), 29.6, 28.4 (2C), 24.5; HRMS (ESI-TOF) *m/z* calcd for C<sub>21</sub>H<sub>45</sub>N<sub>4</sub>O<sub>4</sub> [M+H]<sup>+</sup> 417.3435, found 417.3428.

#### Synthesis of **29c**

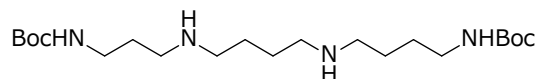

*tert*-butyl (2,2-dimethyl-4-oxo-3-oxa-5,9,14-triazaoctadecan-18-yl)carbamate (**29c**). A 3.6 M solution of Red-Al in toluene (7.5 mL, 27 mmol) was slowly added to a solution of diamide **28c** (667 mg, 1.5 mmol) in toluene/THF (2:1, 20 mL) at 0 °C. The reaction mixture was stirred at 40 °C for 3 h. After cooling to 0 °C, 1 M aqueous NaOH (10 mL) was added slowly. The mixture was stirred for 5 min and extracted with toluene (20 mL). The organic layer was washed with H<sub>2</sub>O (10 mL) and brine (5 mL), dried over MgSO<sub>4</sub>, filtered, and concentrated under reduced pressure. The resulting colorless solid (595 mg, 95.2%) was used in the next step without further purification. <sup>1</sup>H NMR (400 MHz, CDCl<sub>3</sub>) δ 5.19 (br s, 1H), 4.94 (br s, 1H), 3.62–3.60 (m, 1H), 3.24–3.23 (m, 1H), 3.18–3.07 (m, 4H), 2.64–2.54 (m, 8H), 1.64–1.56 (m, 2H), 1.48–1.46 (m, 8H), 1.40 (m, 18H); NH protons (2H) were not observed; <sup>13</sup>C{<sup>1</sup>H} NMR (100 MHz, CDCl<sub>3</sub>) δ 156.04, 155.98, 78.8 (2C), 49.8, 49.7, 49.5, 47.7, 40.4, 39.2, 32.8, 29.9, 28.4, 28.3, 27.83, 27.81, 27.4; HRMS (ESI-TOF) *m/z* calcd for C<sub>21</sub>H<sub>45</sub>N<sub>4</sub>O<sub>4</sub> [M+H]<sup>+</sup> 417.3435, found 417.3436.

### Synthesis of **11**

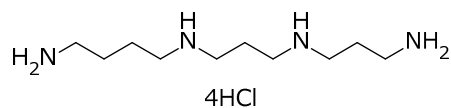

*Thermospermine tetrahydrochloride (11)*. A 4.0 M solution of HCl in 1,4-dioxane (1.0 mL, 4.0 mmol) was added to a solution of the di-Boc compound **29a** (242 mg, 0.6 mmol) in 1,4-dioxane (5.0 mL) at 0 °C. The reaction mixture was stirred at 50 °C for 3 h. After removal of the solvent under reduced pressure, the crude residue was recrystallized from MeOH to afford a colorless solid **11** (134 mg, 64.0%). <sup>1</sup>H NMR (400 MHz, D<sub>2</sub>O) δ 3.22–3.03 (m, 12H), 2.18–2.07 (m, 4H), 1.84–1.72 (m, 4H); <sup>13</sup>C{<sup>1</sup>H} NMR (100 MHz, D<sub>2</sub>O) δ 47.1, 44.7, 44.6, 44.5, 38.8, 36.6, 23.9, 23.8, 22.8, 22.7; HRMS (ESI-TOF) *m/z* calcd for C<sub>10</sub>H<sub>27</sub>N<sub>4</sub> [M+H]<sup>+</sup> 203.2230, found 203.2231.

### Synthesis of **12**

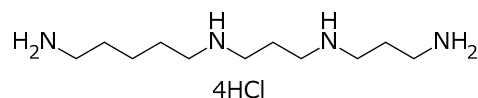

*Aminopentyl norspermidine tetrahydrochloride (12)*. A 4.0 M solution of HCl in 1,4-dioxane (1.0 mL, 4.0 mmol) was added to a solution of the di-Boc compound **29b** (250 mg, 0.6 mmol) in 1,4-dioxane (5.0 mL) at 0 °C. The reaction mixture was stirred at 50 °C for 3 h. After removal of the solvent under reduced pressure, the crude residue was recrystallized from MeOH to afford a colorless solid **12** (161 mg, 74.1%). <sup>1</sup>H NMR (400 MHz, D<sub>2</sub>O) δ 3.21–2.99 (m, 12H), 2.17–2.07 (m, 4H), 1.78–1.68 (m, 4H), 1.50–1.43 (m, 2H); <sup>13</sup>C{<sup>1</sup>H} NMR (100 MHz, D<sub>2</sub>O) δ 47.5, 44.73, 44.65, 44.4, 39.2, 36.5, 26.3, 25.1, 23.8, 22.8, 22.7; HRMS (ESI-TOF) *m/z* calcd for C<sub>11</sub>H<sub>29</sub>N<sub>4</sub> [M+H]<sup>+</sup> 217.2387, found 217.2386.

### Synthesis of **13**

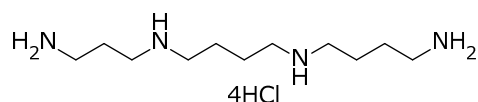

*Aminopropyl homospermidine tetrahydrochloride (13)*. A 4.0 M solution of HCl in 1,4-dioxane (1.5 mL, 6.0 mmol) was added to a solution of the di-Boc compound **29c** (417 mg, 0.6 mmol) in 1,4-dioxane (10.0 mL) at 0 °C. The reaction mixture was stirred at 50 °C for 3 h. After removal of the solvent under reduced pressure, the crude residue was recrystallized from MeOH to afford a colorless solid **13** (304 mg, 83.8%). <sup>1</sup>H NMR (400 MHz, D<sub>2</sub>O) δ 3.19–3.03 (m, 12H), 2.14–2.06 (m, 2H), 1.83–1.70 (m, 8H); <sup>13</sup>C{<sup>1</sup>H} NMR (100 MHz, D<sub>2</sub>O) δ 47.0, 46.93, 46.86, 44.6, 38.8, 36.6, 23.9, 23.8, 22.80, 22.78, 22.76; HRMS (ESI-TOF) *m/z* calcd for C<sub>11</sub>H<sub>29</sub>N<sub>4</sub> [M+H]<sup>+</sup> 217.2387, found 217.2389.

## Synthesis of **31**

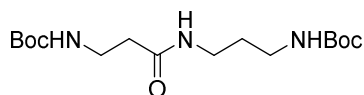

*tert-butyl (3-((3-((tert-butoxycarbonyl)amino)propyl)amino)-3-oxopropyl)carbamate (31)*. A mixture of *N*-Boc-propane-1,3-diamine (**30**) (174 mg, 1.0 mmol), *N*-Boc- $\beta$ -alanine (**21a**) (227 mg, 1.2 mmol), EDC·HCl (230 mg, 1.2 mmol), and DMAP (12 mg, 0.1 mmol) in DMF (5.0 mL) was stirred at 50 °C for 3 h. After cooling in an ice bath, 5% aqueous NaHCO<sub>3</sub> (20 mL) was added, stirred for 10 min at the same temperature, and the precipitate was collected by filtration using a Kiriya funnel and washed with hexane/ethyl acetate (10:1). The resulting colorless solid **31** (332 mg, 96.0%) was used in the next step without further purification. <sup>1</sup>H NMR (400 MHz, CDCl<sub>3</sub>)  $\delta$  6.53 (br s, 1H), 5.29 (br s, 1H), 5.00 (br s, 1H), 3.38 (dd,  $J$  = 12.0, 6.0 Hz, 2H), 3.27 (dd,  $J$  = 12.4, 6.0 Hz, 2H), 3.14 (dd,  $J$  = 12.0, 6.0 Hz, 2H), 2.39 (t,  $J$  = 6.0 Hz, 2H), 1.62–1.56 (m, 2H), 1.42 (s, 9H), 1.41 (s, 9H); <sup>13</sup>C{<sup>1</sup>H} NMR (100 MHz, CDCl<sub>3</sub>)  $\delta$  171.7, 156.6, 156.1, 79.4, 79.2, 37.0, 36.7, 36.2, 35.8, 30.1, 28.3 (2C); HRMS (ESI-TOF)  $m/z$  calcd for C<sub>16</sub>H<sub>32</sub>N<sub>3</sub>O<sub>5</sub> [M+H]<sup>+</sup> 346.2337, found 346.2345.

## Synthesis of **32**

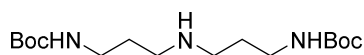

*di-tert-butyl (azanediylbis(propane-1,3-diyl))dicarbamate (32)*. A 3.6 M solution of Red-Al in toluene (1.5 mL, 5.4 mmol) was slowly added to a solution of amide **31** (345 mg, 4.0 mmol) in toluene/THF (2:1, 15 mL) at 0 °C. The reaction mixture was stirred at 40 °C for 3 h. After cooling to 0 °C, 1 M aqueous NaOH (10 mL) was added slowly. The mixture was stirred for 5 min and extracted with toluene (20 mL). The organic layer was washed with H<sub>2</sub>O (10 mL) and brine (5 mL), dried over MgSO<sub>4</sub>, filtered, and concentrated under reduced pressure. The resulting colorless solid **32** (312 mg, 94.2%) was used in the next step without further purification. <sup>1</sup>H NMR (400 MHz, CDCl<sub>3</sub>)  $\delta$  5.35 (br s, 2H), 3.13–3.06 (m, 4H), 2.53 (t,  $J$  = 6.4 Hz, 4H), 1.57–1.48 (m, 4H), 1.48 (s, 18H); NH proton (1H) was not observed; <sup>13</sup>C{<sup>1</sup>H} NMR (100 MHz, CDCl<sub>3</sub>)  $\delta$  156.0, 78.6, 47.1, 38.6, 29.5, 28.2; HRMS (ESI-TOF)  $m/z$  calcd for C<sub>16</sub>H<sub>34</sub>N<sub>3</sub>O<sub>4</sub> [M+H]<sup>+</sup> 332.2544, found 332.2547.

## Synthesis of **1**

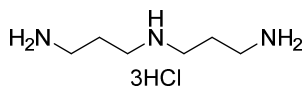

*Norspermidine trihydrochloride (1)*. A 4.0 M solution of HCl in 1,4-dioxane (1.0 mL, 4.0 mmol) was added to a solution of the di-Boc compound **32** (265 mg, 0.8 mmol) in 1,4-dioxane (3.0 mL) at 0 °C. The reaction mixture was stirred at 50 °C for 2 h. After removal of the solvent under reduced pressure, the crude residue was recrystallized from MeOH/*i*PrOH to afford a colorless solid **1** (111 mg, 71.9%). <sup>1</sup>H NMR (400 MHz, D<sub>2</sub>O)  $\delta$  3.10–2.90 (m, 8H), 2.12–1.88 (m, 4H); <sup>13</sup>C{<sup>1</sup>H} NMR (100 MHz, D<sub>2</sub>O)

$\delta$  44.6, 36.5, 23.7; HRMS (ESI-TOF)  $m/z$  calcd for  $C_6H_{18}N_3$   $[M+H]^+$  132.1495, found 132.1492.

### Synthesis of **33**

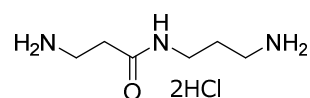

*3-amino-N-(3-aminopropyl)propanamide dihydrochloride (33)*. A 4.0 M solution of HCl in 1,4-dioxane (3.0 mL, 12.0 mmol) was added to a solution of the di-Boc compound **31** (1038 mg, 3.0 mmol) in 1,4-dioxane (3.0 mL) at 0 °C. The reaction mixture was stirred at 50 °C for 2 h. After removal of the solvent under reduced pressure. The resulting colorless solid **33** (648 mg, 99.1%) was used in the next step without further purification.  $^1H$  NMR (400 MHz,  $D_2O$ )  $\delta$  3.31 (t,  $J$  = 6.8 Hz, 2H), 3.27 (t,  $J$  = 6.8 Hz, 2H), 3.01 (t,  $J$  = 7.6 Hz, 2H), 2.68 (t,  $J$  = 6.8 Hz, 2H), 1.91–1.84 (m, 2H);  $^{13}C\{^1H\}$  NMR (100 MHz,  $D_2O$ )  $\delta$  172.5, 37.0, 36.1, 35.7, 31.9, 26.6; HRMS (ESI-TOF)  $m/z$  calcd for  $C_6H_{16}N_3O$   $[M+H]^+$  146.1288, found 146.1285.

### Synthesis of **34**

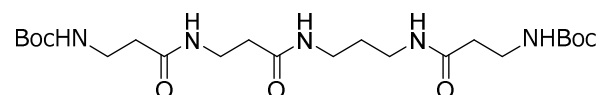

*tert-butyl (2,2-dimethyl-4,8,12,18-tetraoxo-3-oxa-5,9,13,17-tetraazaicosan-20-yl)carbamate (34)*. A mixture of diamine (**33**) (218 mg, 1.0 mmol), *N*-Boc- $\beta$ -alanine (**21a**) (454 mg, 2.4 mmol), EDC·HCl (460 mg, 2.4 mmol), and DMAP (12 mg, 0.1 mmol) in DMF (10 mL) and  $Et_3N$  (0.35 mL, 2.5 mmol) was stirred at 50 °C for 3 h. After cooling in an ice bath, 5% aqueous  $NaHCO_3$  (20 mL) was added, stirred for 10 min at the same temperature, and the precipitate was collected by filtration using a Kiriya funnel and washed with hexane/ethyl acetate (10:1). The resulting colorless solid **34** (410 mg, 84.1%) was used in the next step without further purification.  $^1H$  NMR (400 MHz,  $DMSO-d_6$ )  $\delta$  7.92–7.85 (m, 3H), 6.78–6.75 (m, 2H), 3.22–3.03 (m, 10H), 2.22–2.19 (m, 6H), 1.52–1.49 (m, 2H), 1.37 (s, 18H);  $^{13}C\{^1H\}$  NMR (100 MHz,  $DMSO-d_6$ )  $\delta$  170.31 (2C), 170.27, 155.5 (2C), 77.6 (2C), 36.81, 36.78, 36.2 (2C), 35.9, 35.8, 35.5, 35.3, 29.1, 28.3 (2C); HRMS (ESI-TOF)  $m/z$  calcd for  $C_{22}H_{42}N_5O_7$   $[M+H]^+$  488.3079, found 488.3071.

### Synthesis of **35**

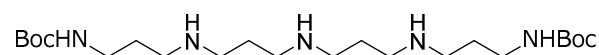

*di-tert-butyl (((azanediylbis(propane-3,1-diyl))bis(azanediyl))bis(propane-3,1-diyl))dicarbamate (35)*. A 3.6 M solution of Red-Al in toluene (2.8 mL, 10.1 mmol) was slowly added to a solution of amide **34** (322 mg, 0.66 mmol) in toluene/THF (2:1, 15 mL) at 0 °C. The reaction mixture was stirred at 40 °C for 3 h. After cooling to 0 °C, 1 M aqueous NaOH (10 mL) was added slowly. The mixture was



stirred for 5 min and extracted with CH<sub>2</sub>Cl<sub>2</sub> (20 mL×2). The organic layer was washed with H<sub>2</sub>O (10 mL) and brine (5 mL), dried over MgSO<sub>4</sub>, filtered, and concentrated under reduced pressure. The resulting colorless solid **35** (232 mg, 79.1%) was used in the next step without further purification. <sup>1</sup>H NMR (400 MHz, CD<sub>3</sub>OD) δ 3.09 (t, *J* = 6.4 Hz, 4H), 2.66–2.58 (m, 12H), 1.75–1.63 (m, 8H), 1.43 (s, 18H); <sup>13</sup>C{<sup>1</sup>H} NMR (100 MHz, CD<sub>3</sub>OD) δ 158.6, 79.9, 47.8, 39.1, 30.7, 29.9, 28.8; Two carbon signals overlap with the solvent signal; HRMS (ESI-TOF) *m/z* calcd for C<sub>22</sub>H<sub>48</sub>N<sub>5</sub>O<sub>4</sub> [M+H]<sup>+</sup> 446.3701, found 446.3705.

#### Synthesis of **14**

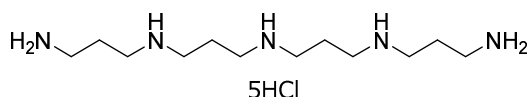

*Caldopentamine pentahydrochloride (14)*. A 4.0 M solution of HCl in 1,4-dioxane (0.5 mL, 2.0 mmol) was added to a solution of the di-Boc compound **35** (265 mg, 0.4 mmol) in 1,4-dioxane (2.0 mL) at 0 °C. The reaction mixture was stirred at 50 °C for 2 h. After removal of the solvent under reduced pressure, the crude residue was recrystallized from EtOH/H<sub>2</sub>O to afford a colorless solid **14** (110 mg, 64.3%). <sup>1</sup>H NMR (400 MHz, D<sub>2</sub>O) δ 3.20–3.08 (m, 16H), 2.16–2.05 (m, 8H); <sup>13</sup>C{<sup>1</sup>H} NMR (100 MHz, D<sub>2</sub>O) δ 44.7, 44.6, 44.5, 36.5, 23.7, 22.6; HRMS (ESI-TOF) *m/z* calcd for C<sub>12</sub>H<sub>32</sub>N<sub>5</sub> [M+H]<sup>+</sup> 246.2652, found 246.2657.

The <sup>1</sup>H NMR (400 MHz, D<sub>2</sub>O) and <sup>13</sup>C NMR (100 MHz, D<sub>2</sub>O) data of caldopentamine pentahydrochloride were in good agreement with those reported in the literature (ref. 49).

#### Synthesis of **36**

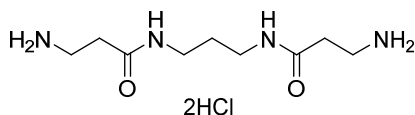

*N,N'-(propane-1,3-diyl)bis(3-aminopropanamide) dihydrochloride (36)*. A 4.0 M solution of HCl in 1,4-dioxane (1.5 mL, 6.0 mmol) was added to a solution of the di-Boc compound **23a** (416 mg, 1.0 mmol) in 1,4-dioxane (10 mL) at 0 °C. The reaction mixture was stirred at 50 °C for 3 h. After removal of the solvent under reduced pressure, the resulting colorless solid **36** (281 mg, 97.2%) was used in the next step without further purification. <sup>1</sup>H NMR (400 MHz, D<sub>2</sub>O) δ 3.28–3.15 (m, 8H), 2.61 (t, *J* = 6.4 Hz, 4H), 1.70–1.63 (m, 2H); <sup>13</sup>C{<sup>1</sup>H} NMR (100 MHz, D<sub>2</sub>O) δ 172.0, 36.5, 35.7, 32.0, 27.7; HRMS (ESI-TOF) *m/z* calcd for C<sub>9</sub>H<sub>20</sub>N<sub>4</sub>O<sub>2</sub> [M+H]<sup>+</sup> 217.1659, found 217.1656.

#### Synthesis of **37**

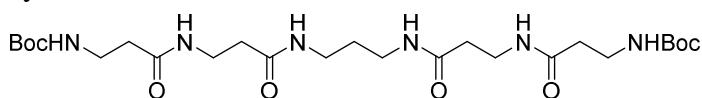

*di-tert-butyl (3,7,13,17-tetraoxo-4,8,12,16-tetraazanonadecane-1,19-diyl)dicarbamate (37)*. A

mixture of diamine (**36**) (578 mg, 2.0 mmol), *N*-Boc- $\beta$ -alanine (**21a**) (1135 mg, 6.0 mmol), EDC·HCl (1150 mg, 6.0 mmol), and DMAP (24 mg, 0.2 mmol) in EtOH (12 mL) and 1 M aqueous NaOH (6.0 mL, 6.0 mmol) was stirred at 50 °C for 12 h. After removal of the EtOH under reduced pressure, and the precipitate was collected by filtration using a Kiriya funnel and washed with H<sub>2</sub>O and hexane/ethyl acetate (10:1). The resulting colorless solid **37** (969 mg, 86.7%) was used in the next step without further purification. <sup>1</sup>H NMR (400 MHz, DMSO-*d*<sub>6</sub>)  $\delta$  7.91–7.83 (m, 4H), 6.75–6.72 (m, 2H), 3.24–3.20 (m, 4H), 3.13–3.02 (m, 8H), 2.23–2.18 (m, 8H), 1.55–1.48 (m, 2H), 1.37 (s, 18H); <sup>13</sup>C{<sup>1</sup>H} NMR (100 MHz, DMSO-*d*<sub>6</sub>)  $\delta$  170.3 (2C), 155.4, 77.6, 36.7, 36.1, 35.7, 35.5, 35.3, 29.1, 28.2; HRMS (ESI-TOF) *m/z* calcd for C<sub>25</sub>H<sub>47</sub>N<sub>6</sub>O<sub>8</sub> [M+H]<sup>+</sup> 559.3450, found 559.3455.

### Synthesis of **38**

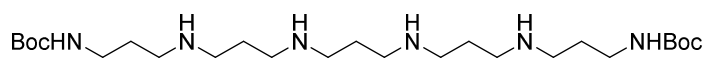

*di-tert-butyl (4,8,12,16-tetraazanonadecane-1,19-diyl)dicarbamate (38)*. A 3.6 M solution of Red-Al in toluene (5.6 mL, 20.2 mmol) was slowly added to a solution of amide **37** (559 mg, 1.0 mmol) in toluene/THF (2:1, 20 mL) at 0 °C. The reaction mixture was stirred at 40 °C for 5 h. After cooling to 0 °C, 1 M aqueous NaOH (10 mL) was added slowly. The mixture was stirred for 5 min and extracted with CH<sub>2</sub>Cl<sub>2</sub> (20 mL×2). The organic layer was washed with H<sub>2</sub>O (10 mL) and brine (5 mL), dried over MgSO<sub>4</sub>, filtered, and concentrated under reduced pressure. The resulting colorless solid (374 mg, 74.4%) was used in the next step without further purification. <sup>1</sup>H NMR (400 MHz, CDCl<sub>3</sub>)  $\delta$  5.35–5.09 (m, 4H), 3.18–3.17 (m, 4H), 2.66–2.59 (m, 16H), 1.70–1.62 (m, 10H), 1.43 (s, 18H); <sup>13</sup>C{<sup>1</sup>H} NMR (100 MHz, CDCl<sub>3</sub>)  $\delta$  156.1, 79.0, 48.44, 48.36, 48.3, 47.7, 39.1, 30.2, 29.9, 28.4, 22.2; HRMS (ESI-TOF) *m/z* calcd for C<sub>25</sub>H<sub>55</sub>N<sub>6</sub>O<sub>4</sub> [M+H]<sup>+</sup> 503.4279, found 503.4270.

### Synthesis of **17**

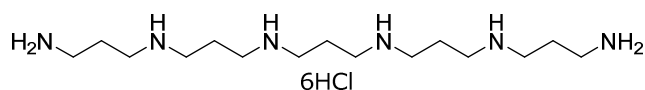

*Caldohexamine hexahydrochloride (17)*. A 4.0 M solution of HCl in 1,4-dioxane (1.0 mL, 4.0 mmol) was added to a solution of the di-Boc compound **38** (251 mg, 0.50 mmol) in 1,4-dioxane (5.0 mL) at 0 °C. The reaction mixture was stirred at 50 °C for 3 h. After removal of the solvent under reduced pressure, the crude residue was recrystallized from EtOH/H<sub>2</sub>O to afford a colorless solid **17** (143 mg, 54.8%). <sup>1</sup>H NMR (400 MHz, D<sub>2</sub>O)  $\delta$  3.09–2.98 (m, 20H), 2.06–1.95 (m, 10H); <sup>13</sup>C{<sup>1</sup>H} NMR (100 MHz, D<sub>2</sub>O)  $\delta$  66.6, 44.7, 44.60 (2C), 44.58, 36.5, 23.7, 22.7; HRMS (ESI-TOF) *m/z* calcd for C<sub>15</sub>H<sub>39</sub>N<sub>6</sub> [M+H]<sup>+</sup> 303.3231, found 303.3221.

The <sup>1</sup>H NMR (400 MHz, D<sub>2</sub>O) data of caldohexamine hexahydrochloride was in good agreement with those reported in the literature (ref. 49).

Table S1. Comparison of the present polyamine synthesis with previously reported methods.

| Method                                | Key reagents / steps                                             | Number of steps                                        | purification                                                | Notes                                                                                                                                                                                   |
|---------------------------------------|------------------------------------------------------------------|--------------------------------------------------------|-------------------------------------------------------------|-----------------------------------------------------------------------------------------------------------------------------------------------------------------------------------------|
| Niitsu, M. <i>et al.</i><br>(ref. 12) | Gabriel synthesis<br>(phthalimide alkylation,<br>hydrazinolysis) | <b>14</b> : 8 steps<br><b>15</b> : 7 steps             | Column chromatography,<br>recrystallisation                 | First chemical synthesis of compounds <b>14</b> and <b>15</b> ; establishment of a series of ten pentaamines                                                                            |
| Oshima, T. <i>et al.</i><br>(ref. 49) | Gabriel synthesis<br>(phthalimide alkylation,<br>hydrazinolysis) | <b>14</b> : 3 steps<br><b>17</b> : 10 steps            | Column chromatography,<br>recrystallisation                 | Compound <b>14</b> synthesized in 3 steps from commercially available compound <b>6</b> ; costly starting material; compound <b>17</b> with synthetic route and <sup>1</sup> H NMR only |
| Kariya, Y. <i>et al.</i><br>(ref. 13) | Ns chemistry (nosyl-<br>protected amines,<br>reductive removal)  | <b>6,7</b> : 5 steps<br><b>11</b> : 11 steps           | Column chromatography,<br>solid-phase final<br>purification | High purity via solid-phase workflow; simple final purification                                                                                                                         |
| This work                             | EDC amidation and<br>Red-Al reduction                            | <b>1, 6–10</b> : 3 steps<br><b>11–14, 17</b> : 5 steps | Recrystallisation                                           | Chromatography-free synthesis;<br>short and modular routes;<br>first full characterization of compound <b>17</b>                                                                        |

Compound names and numbers (same as in the main text): norspermidine (**1**); norspermine (**6**); spermine (**7**); bis(aminopropyl)cadaverine (**8**); canavalmine (**9**); homospermine (**10**); thermospermine (**11**); aminopentyl norspermidine (**12**); aminopropyl homospermidine (**13**); caldopentamine (**14**); homocaldopentamine (**15**); caldohexamine (**17**).

# NMR chart of **23a**

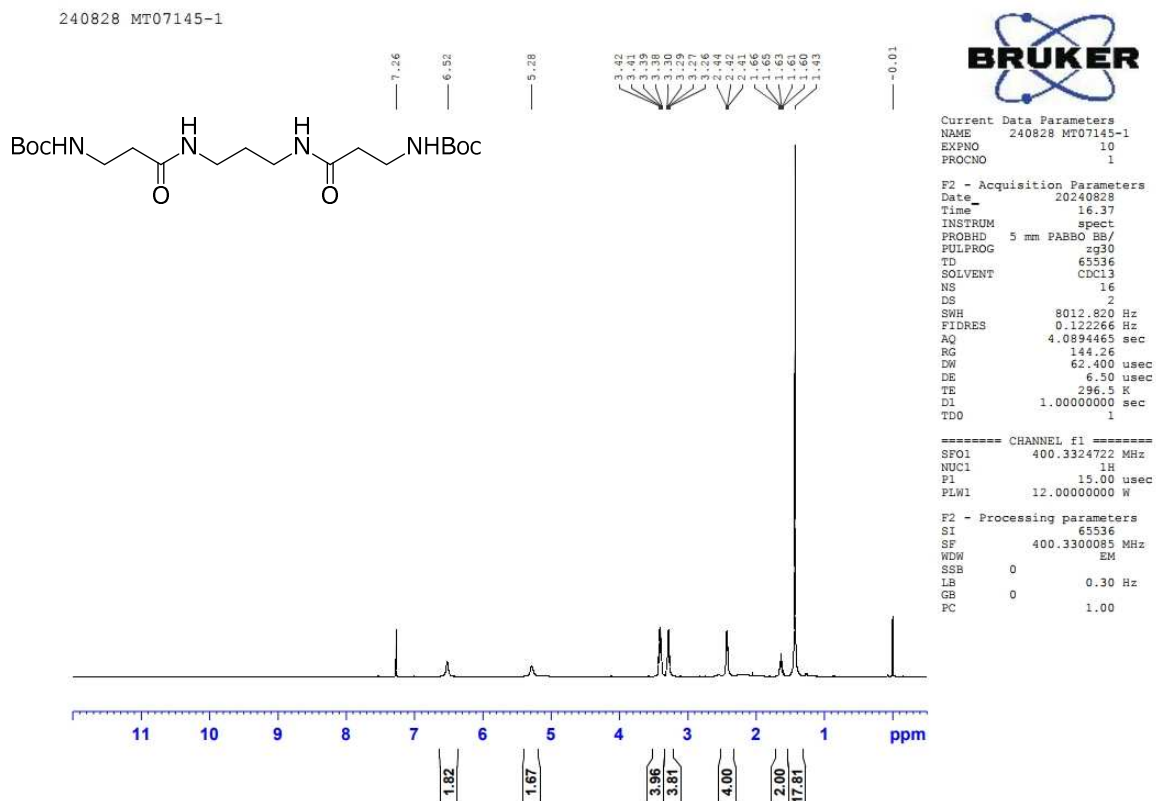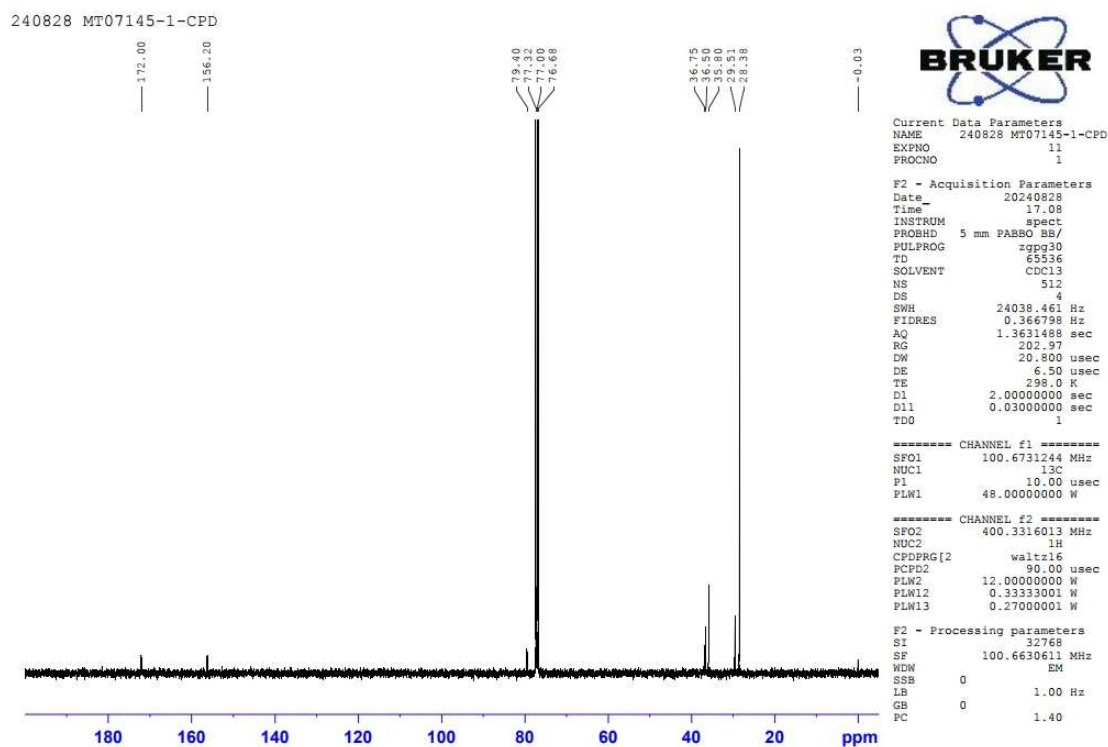

# NMR chart of **23b**

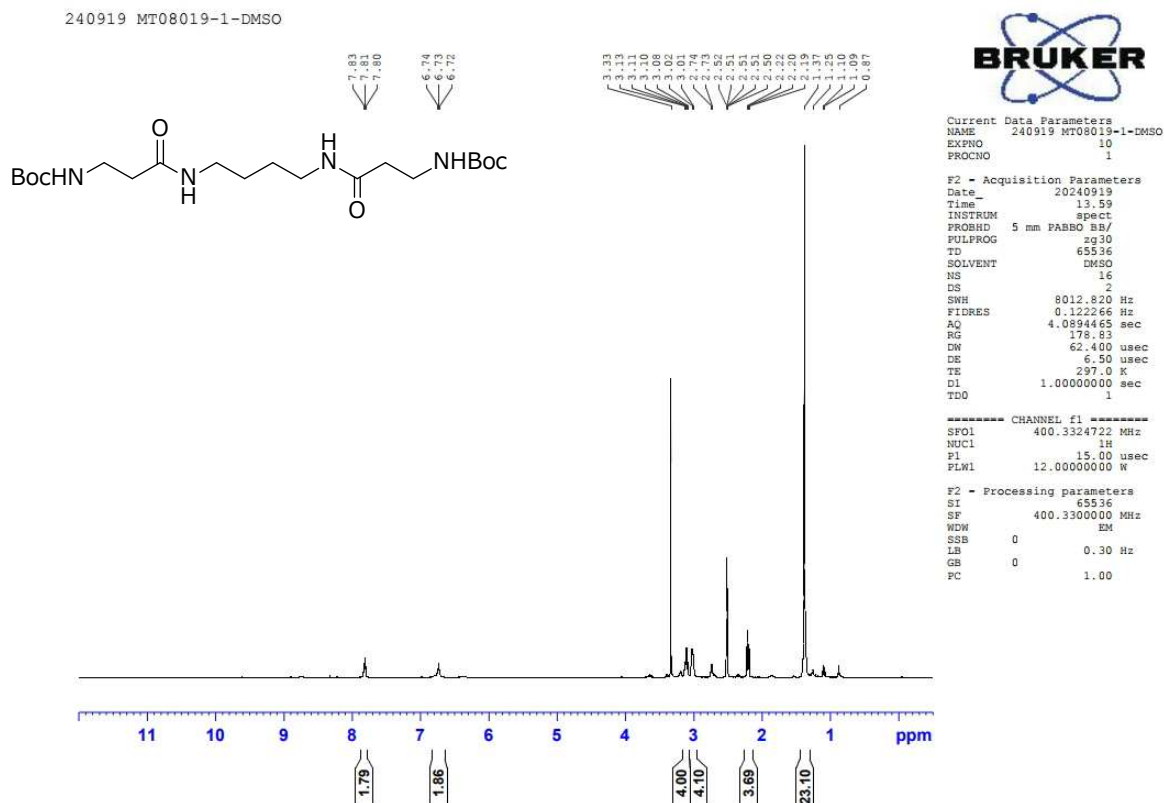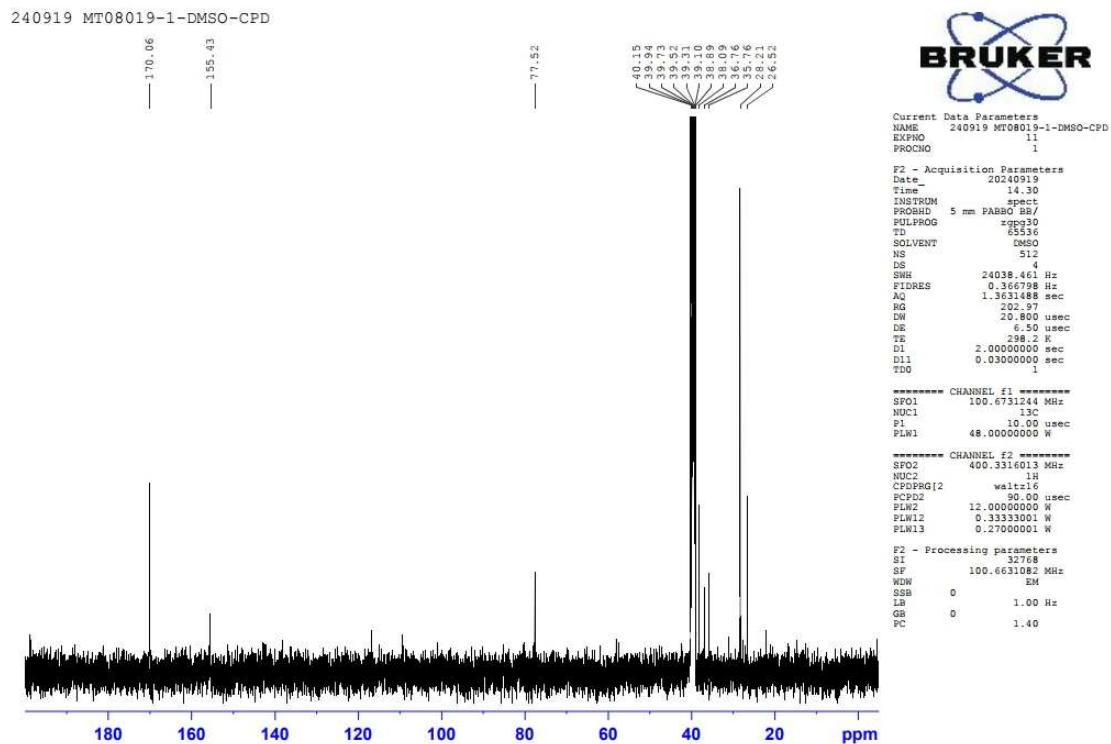

# NMR chart of 23c

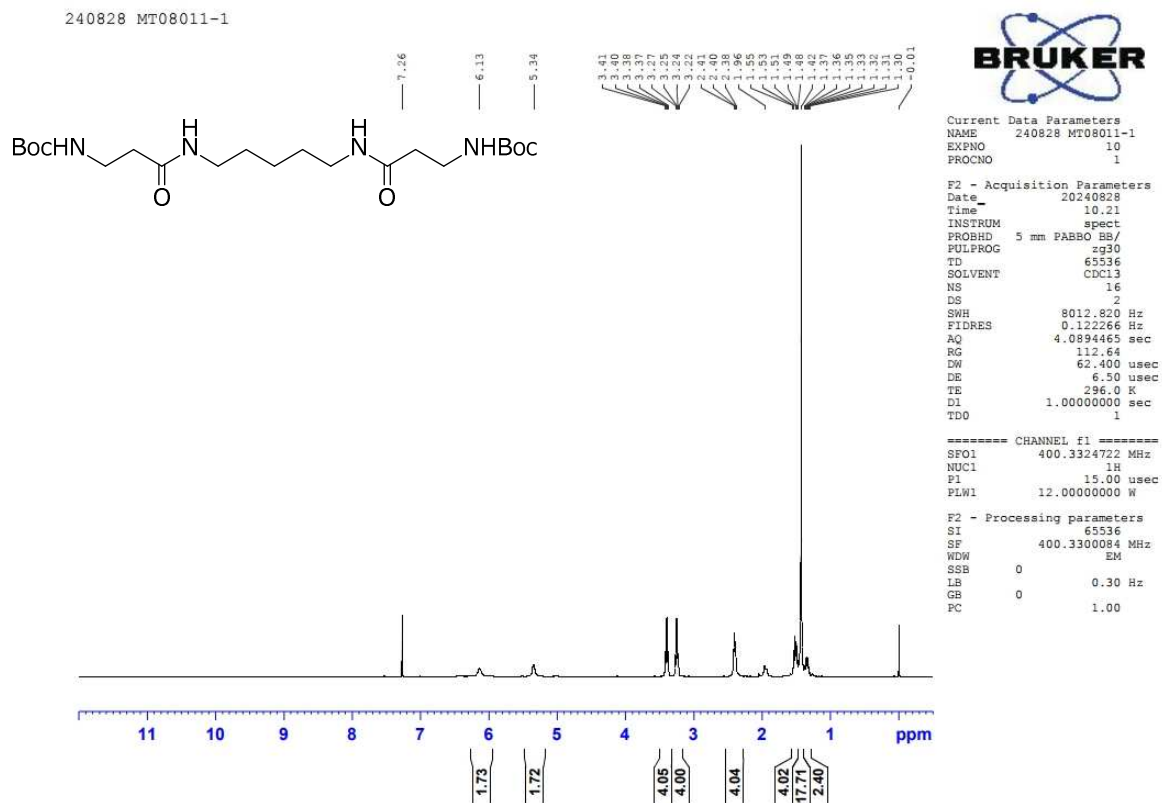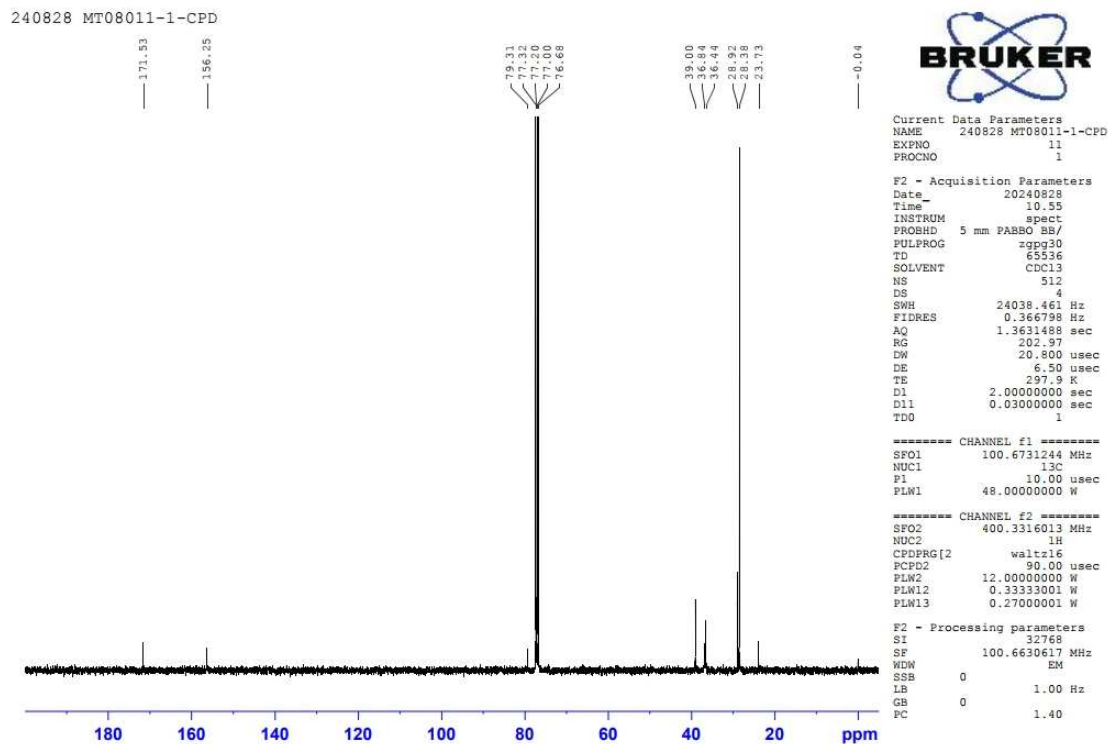

# NMR chart of **23d**

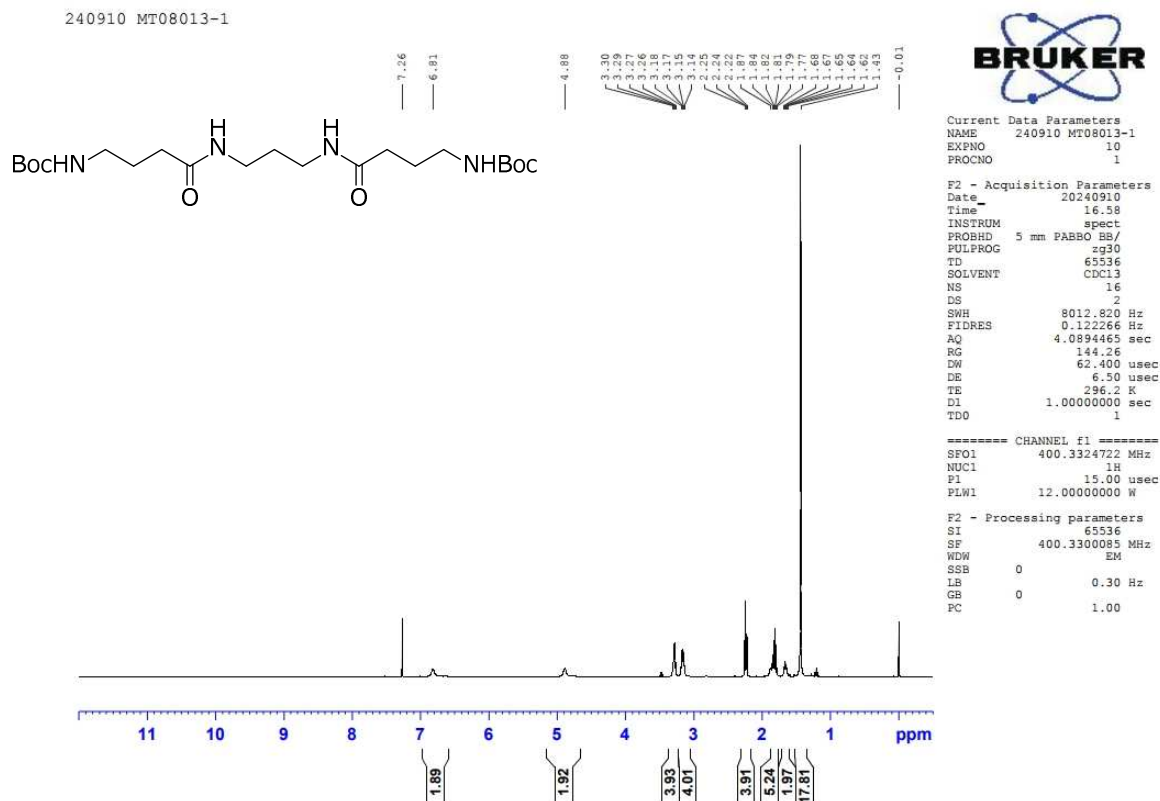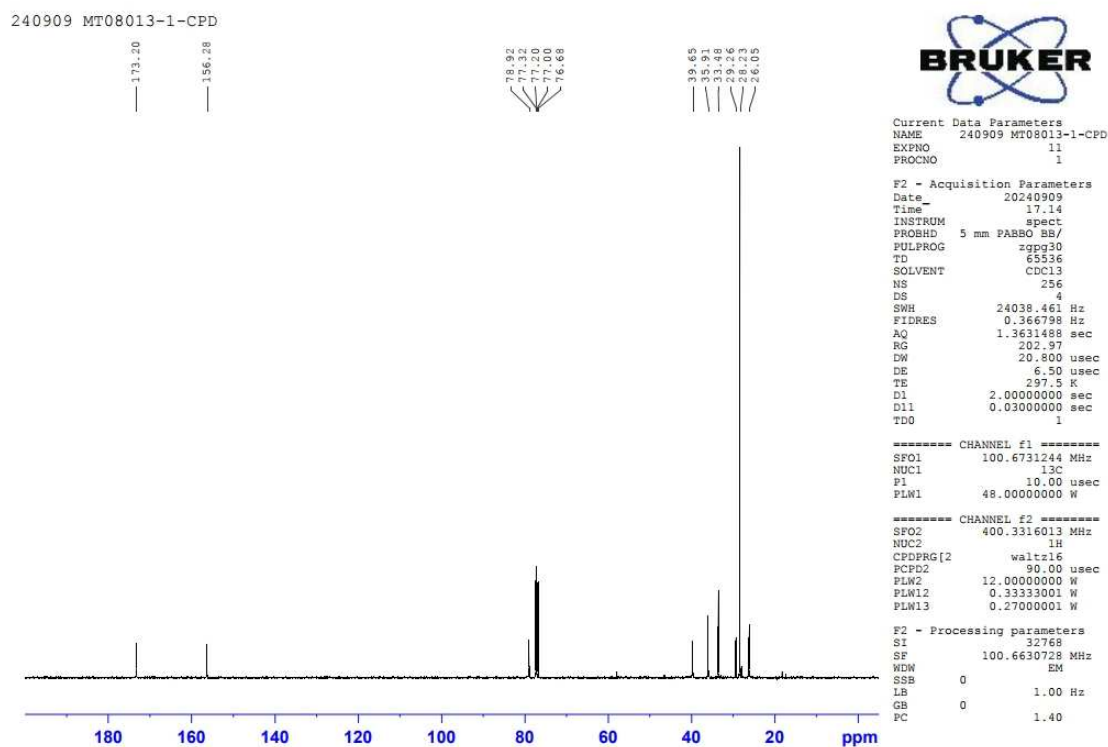

# NMR chart of **23e**

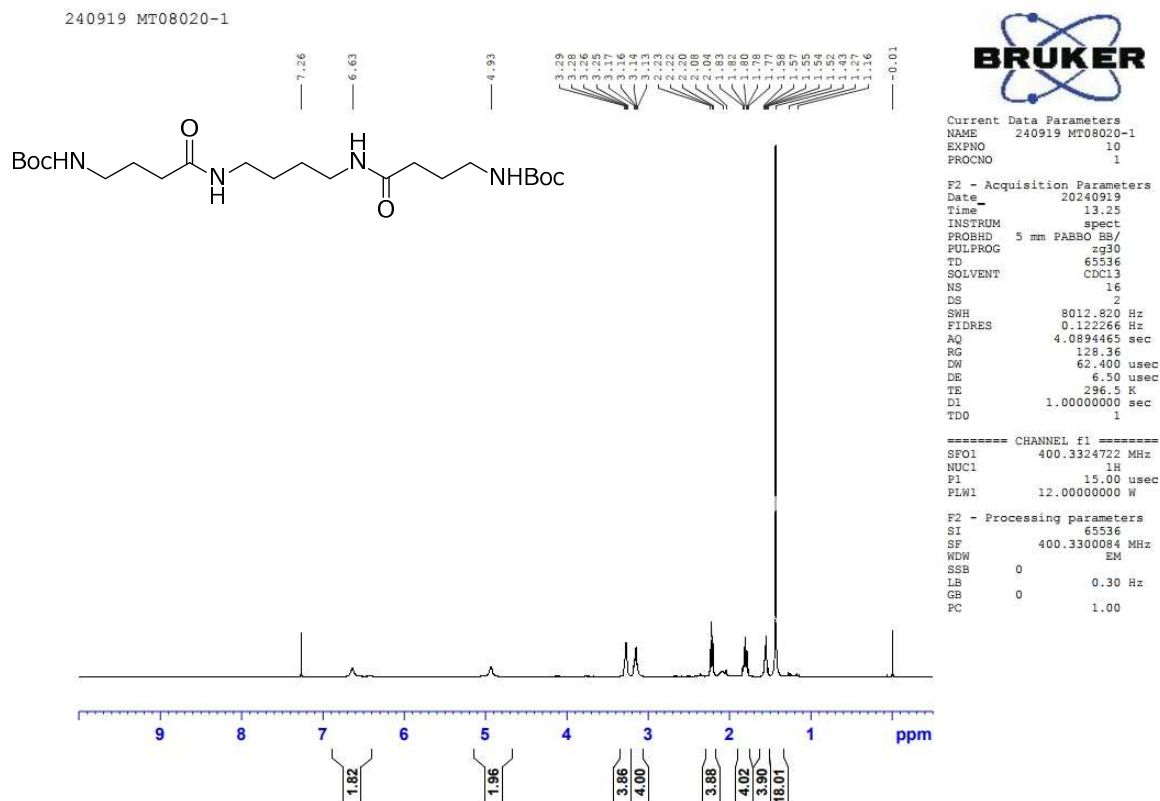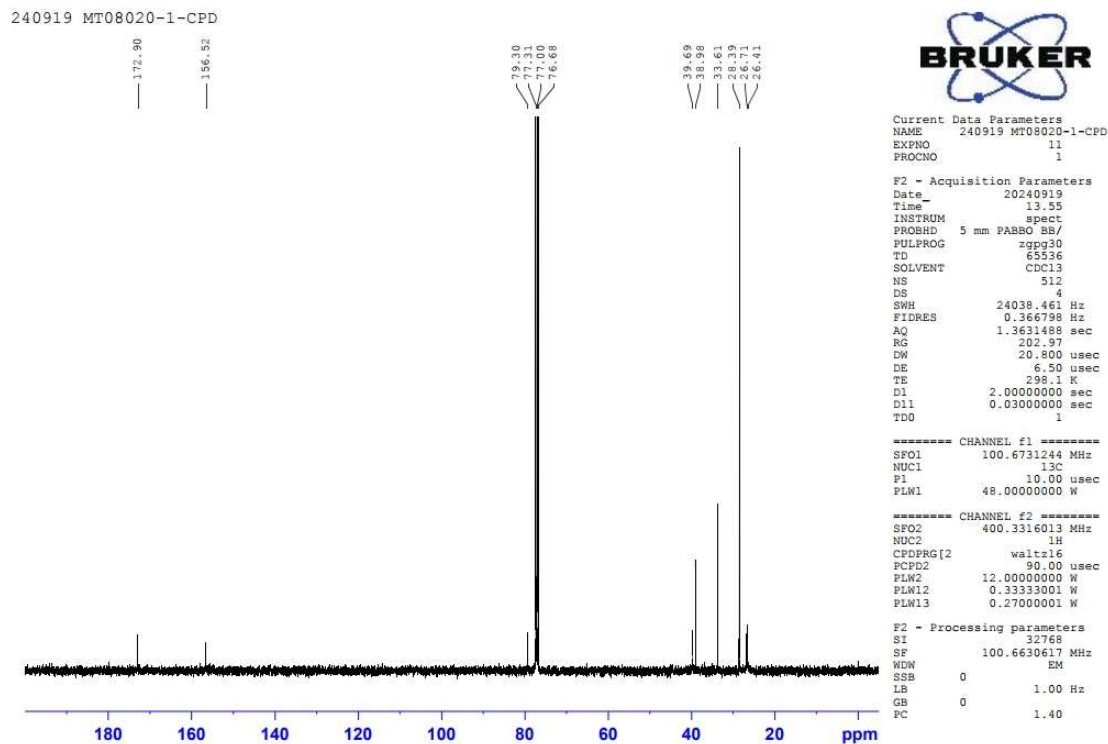



# NMR chart of **24a**

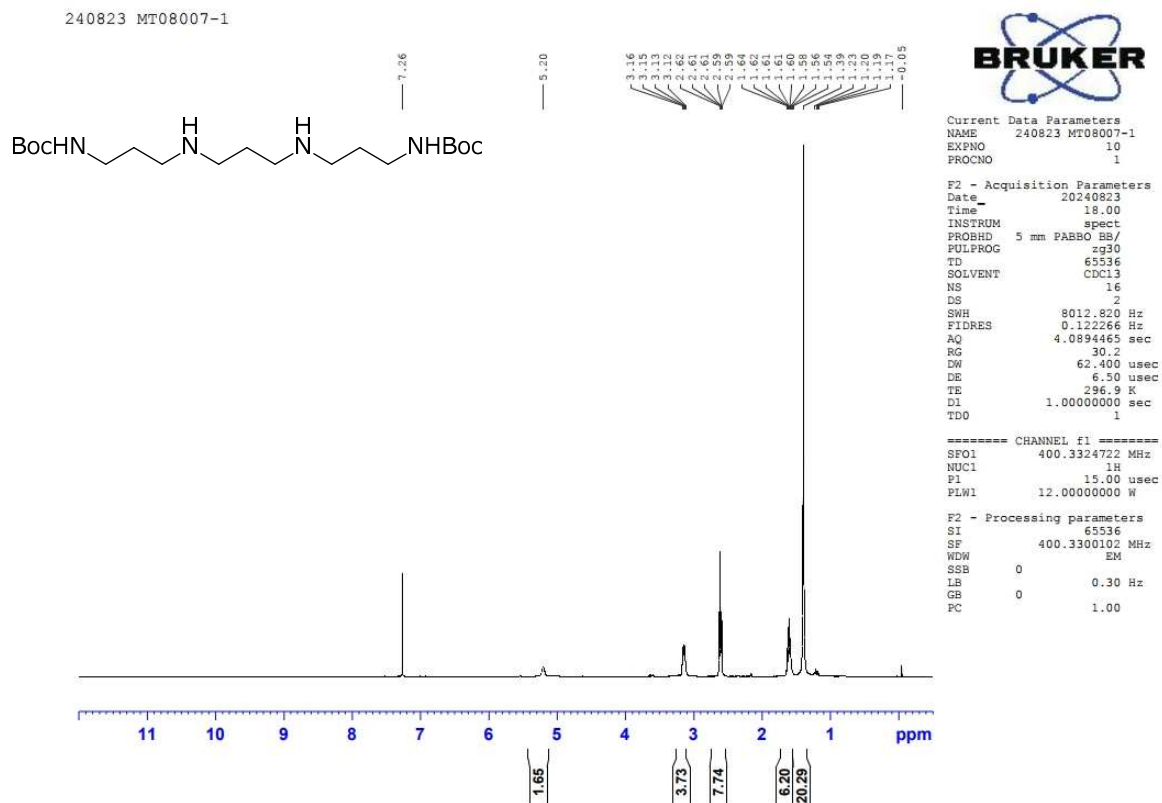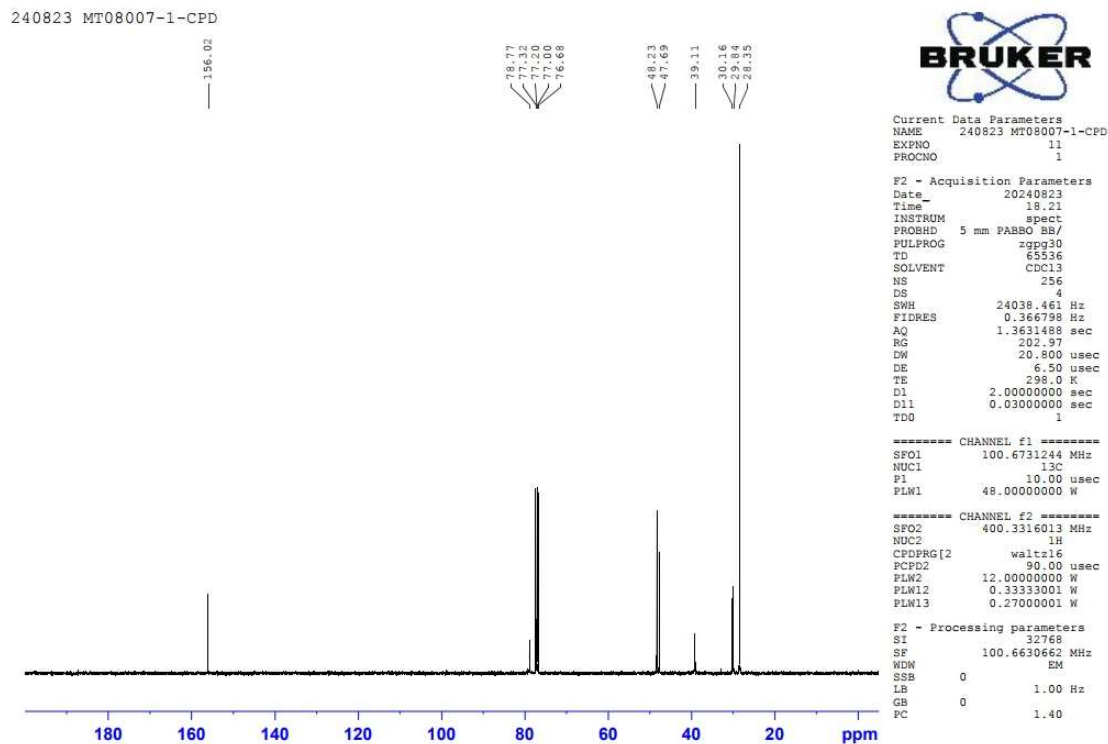

# NMR chart of **24b**

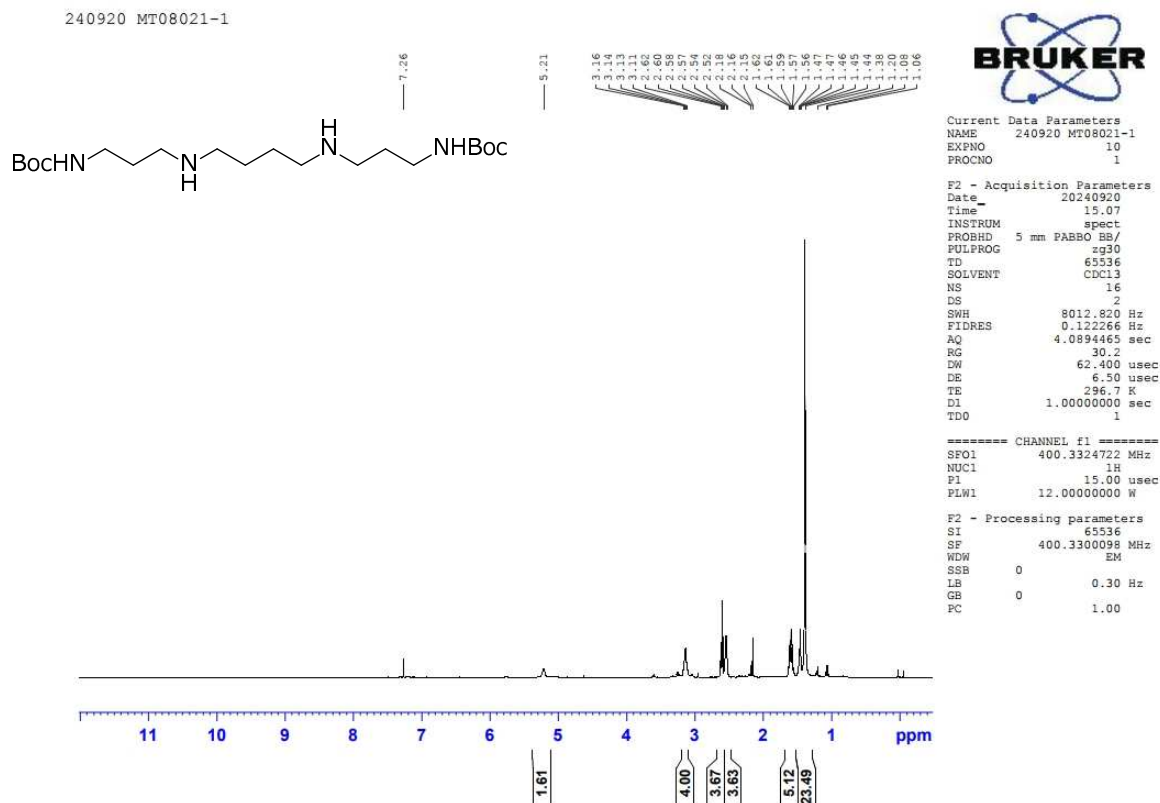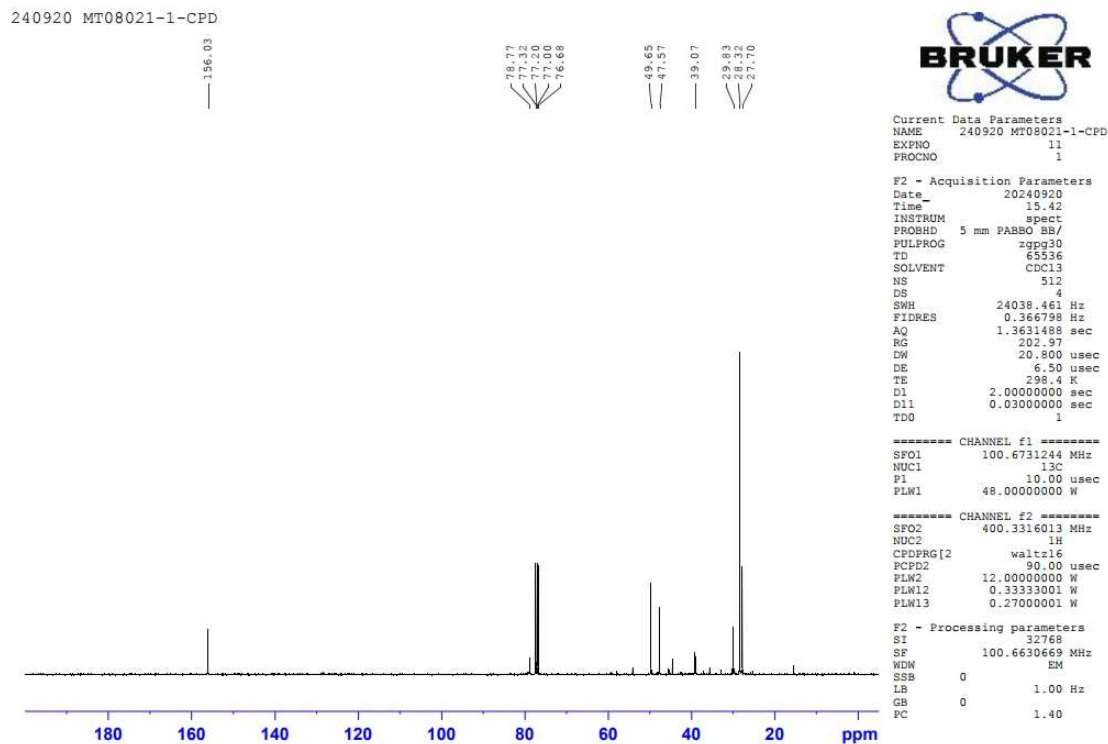

# NMR chart of **24c**

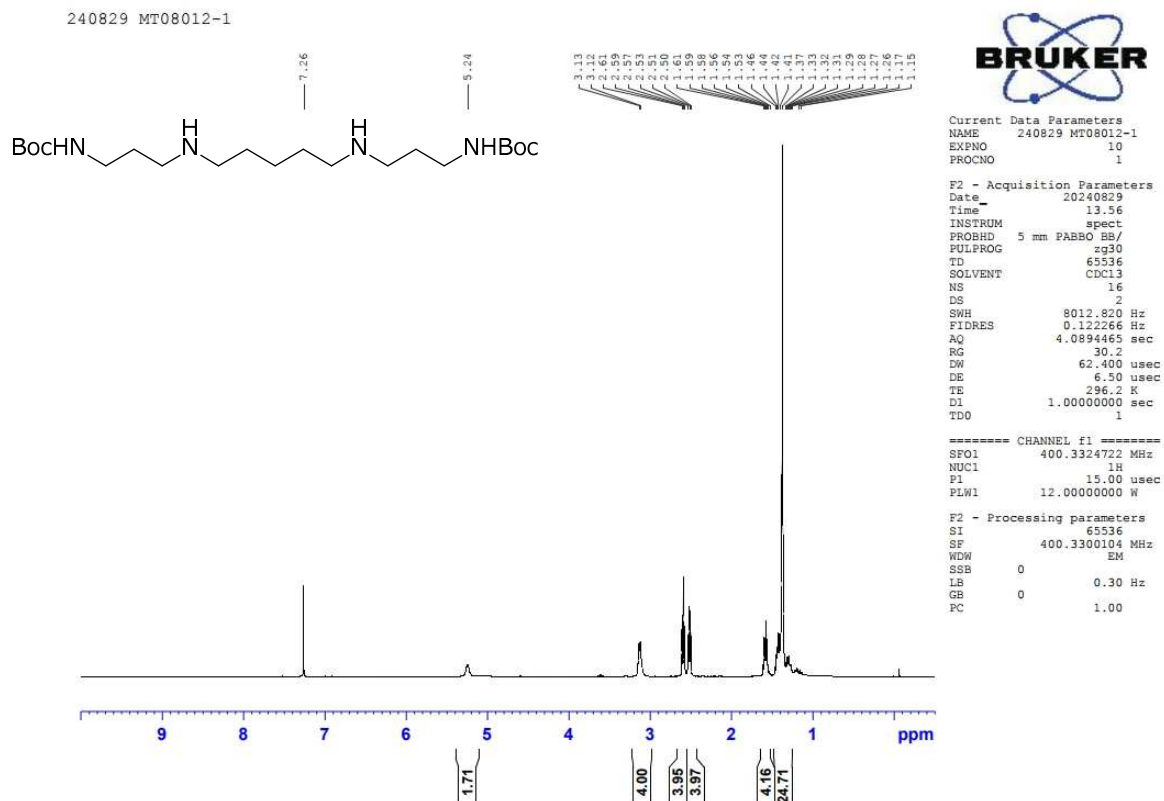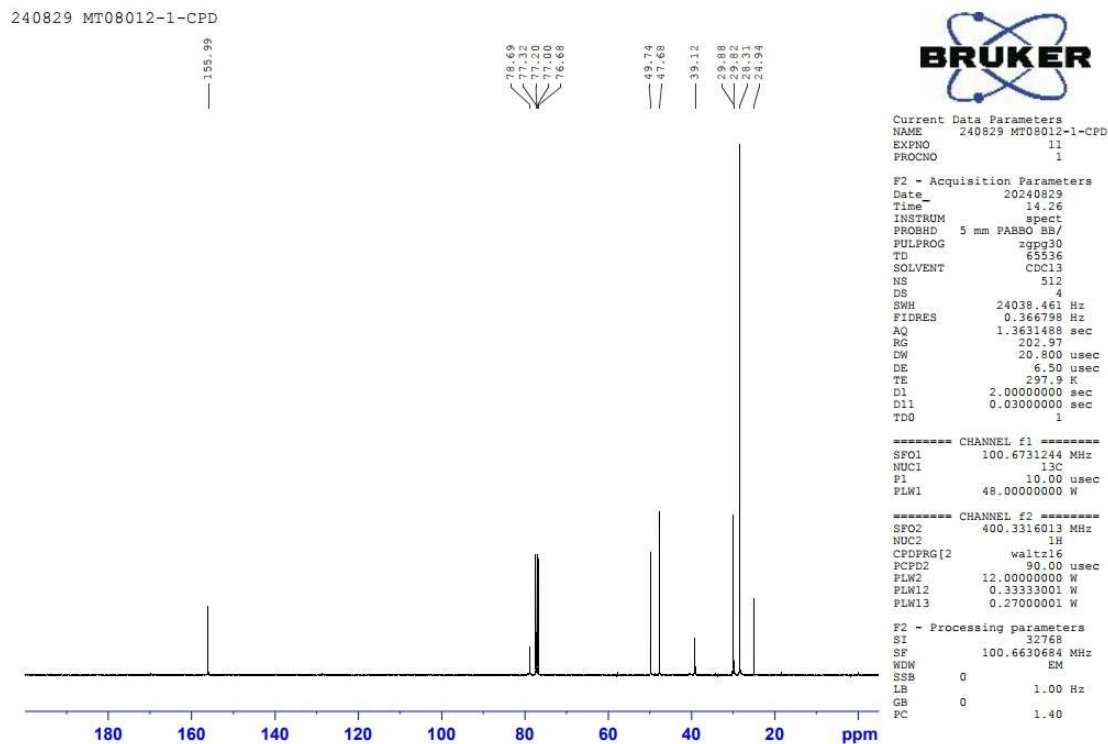

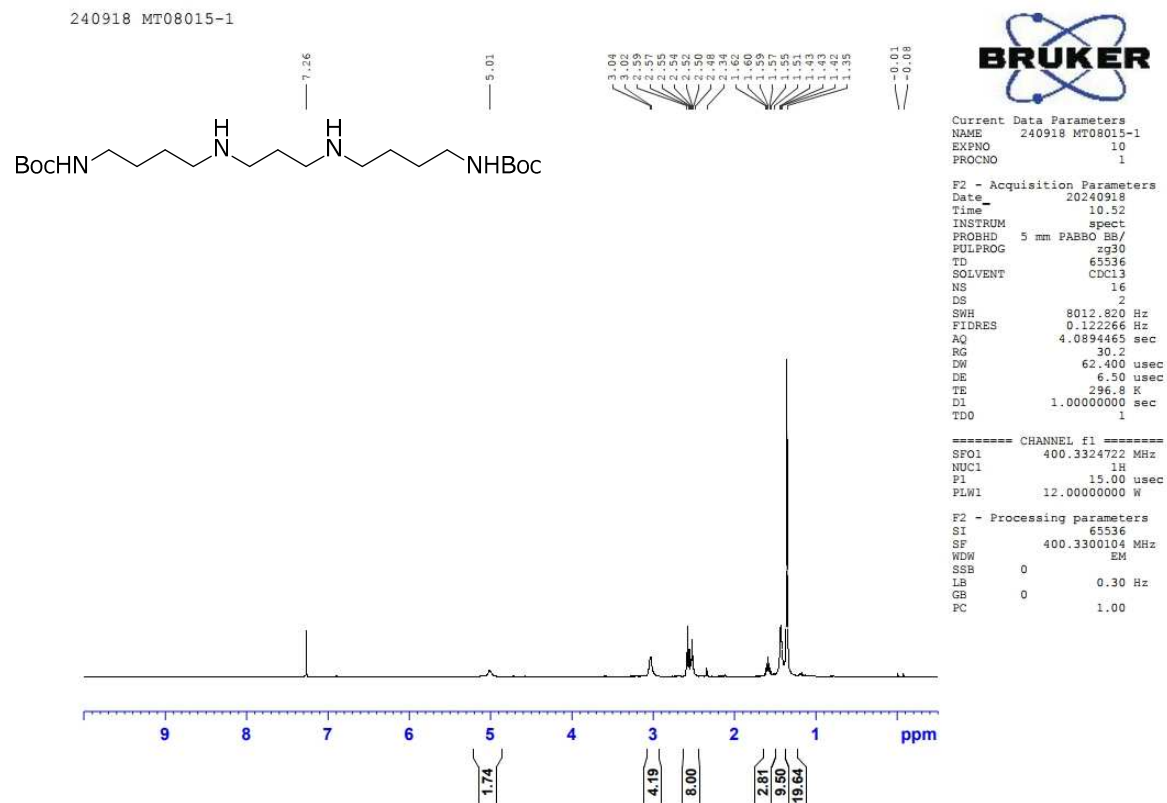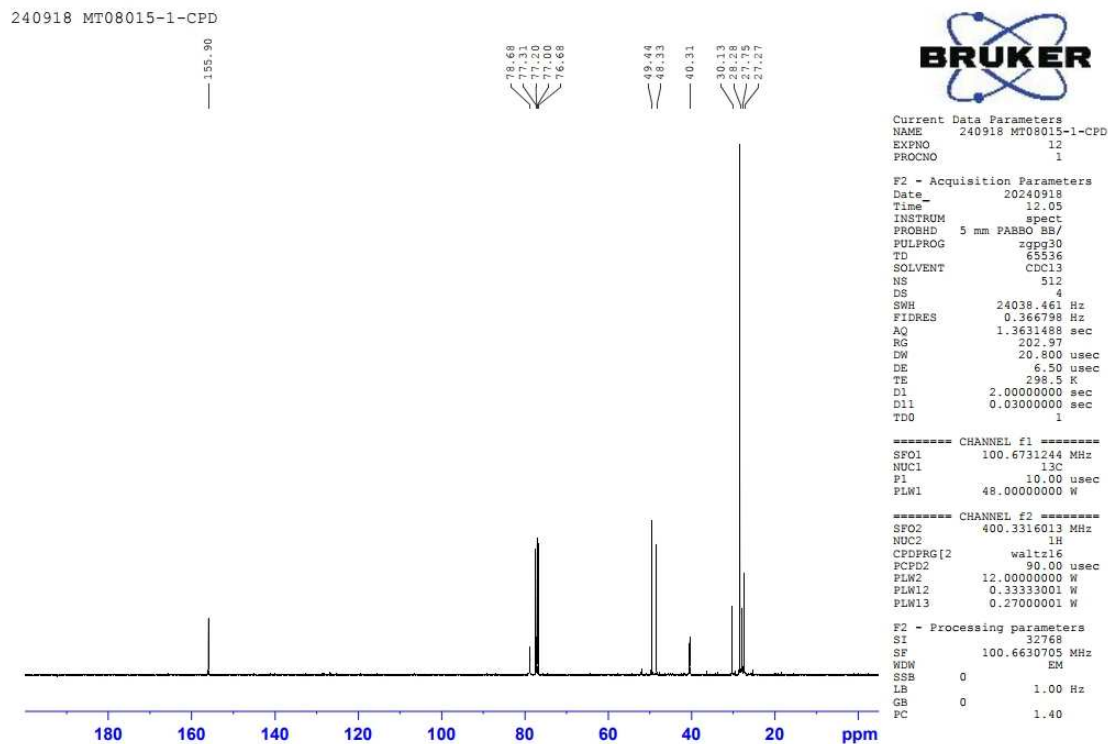

# NMR chart of **24e**

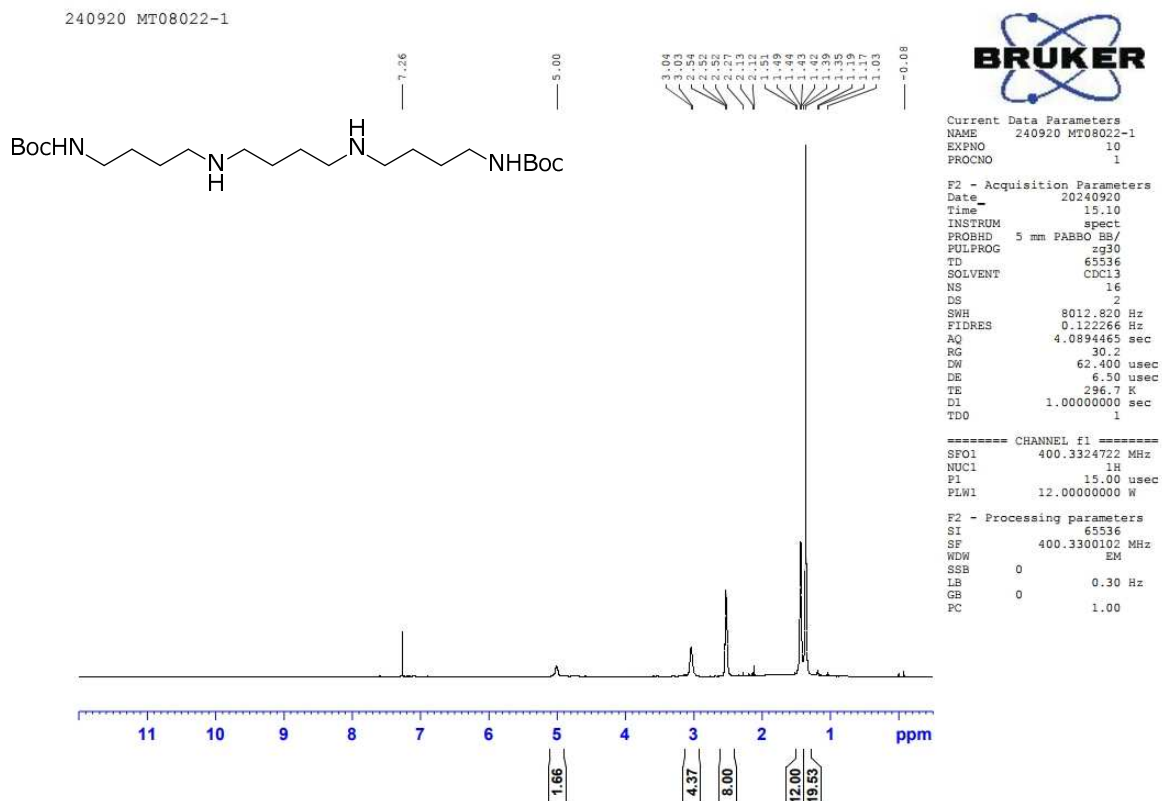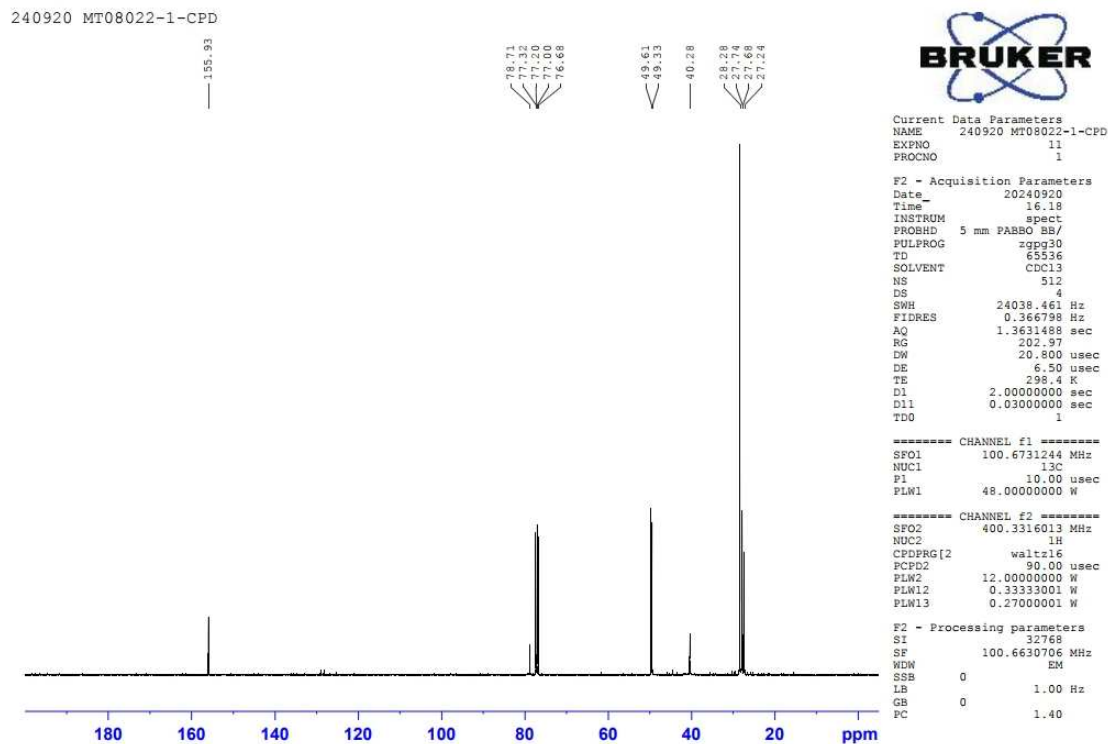

# NMR chart of 6

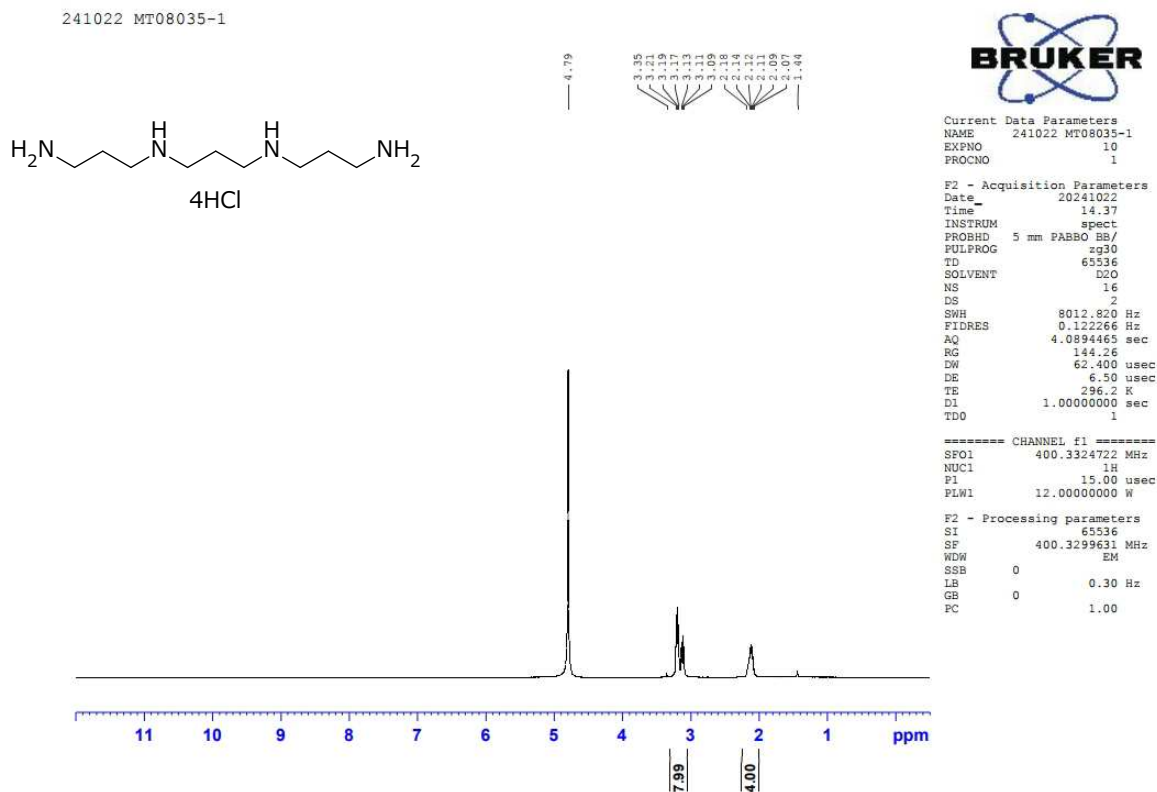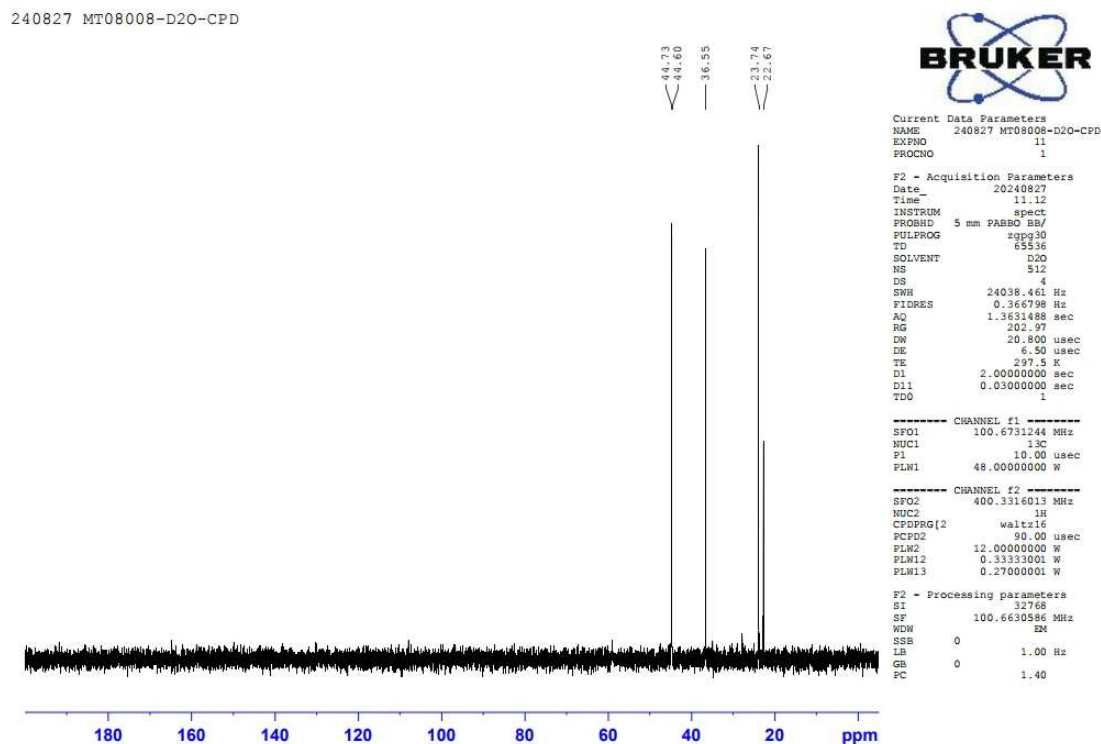

# NMR chart of 7

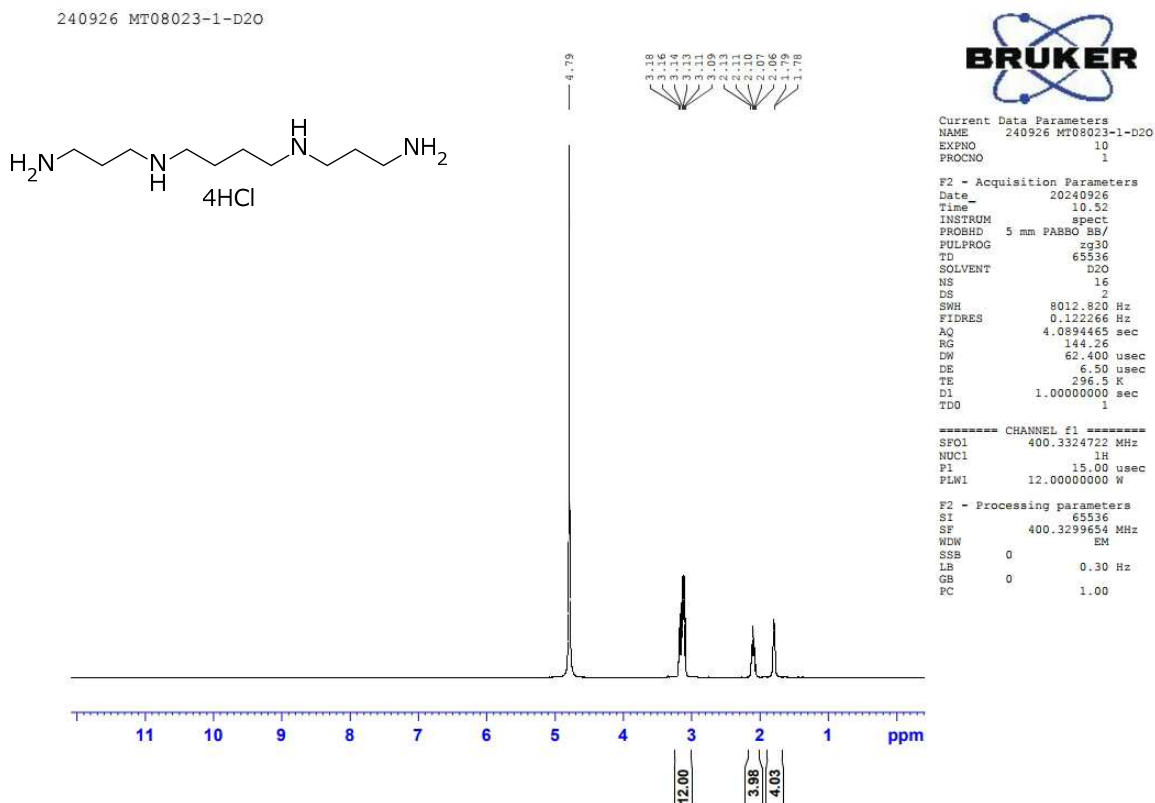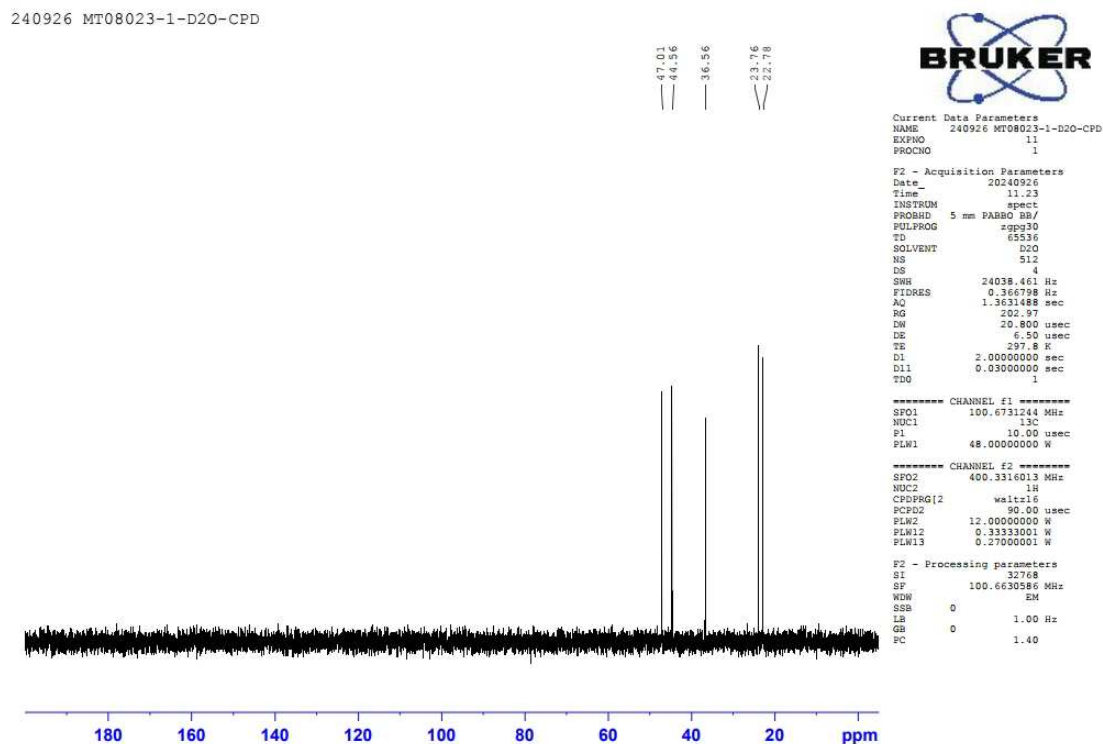



# NMR chart of 8

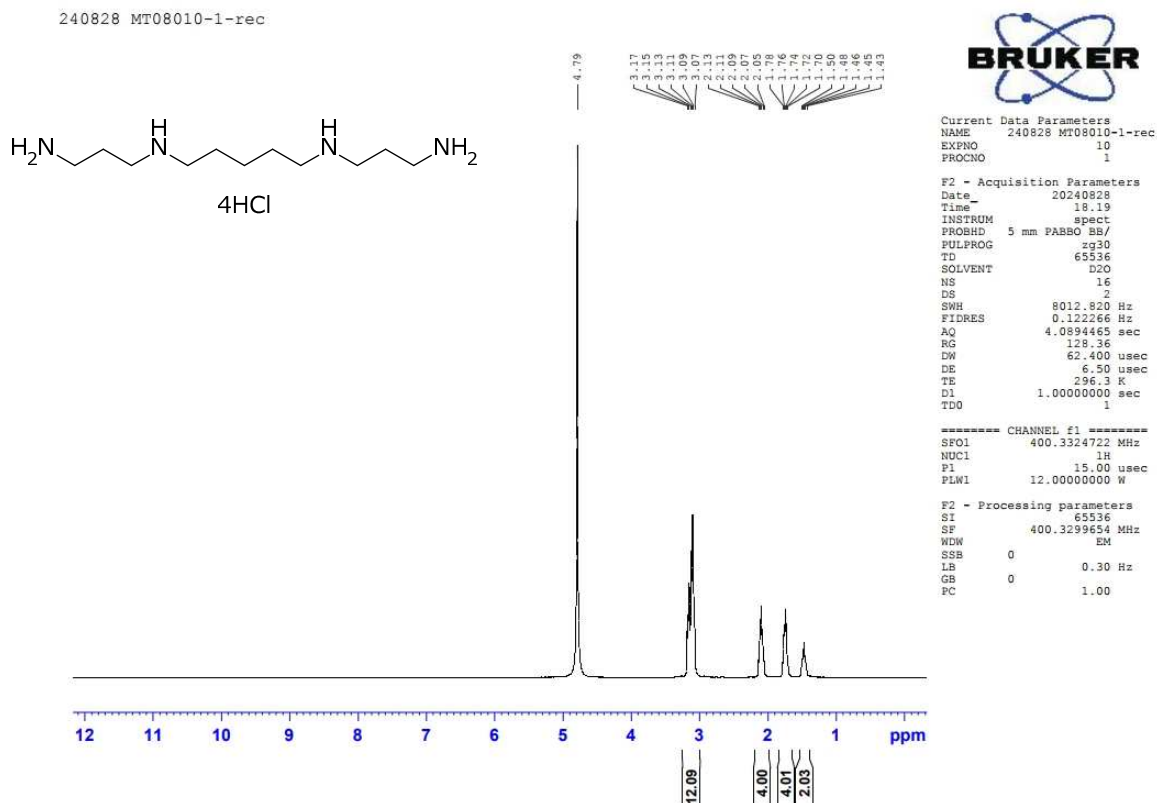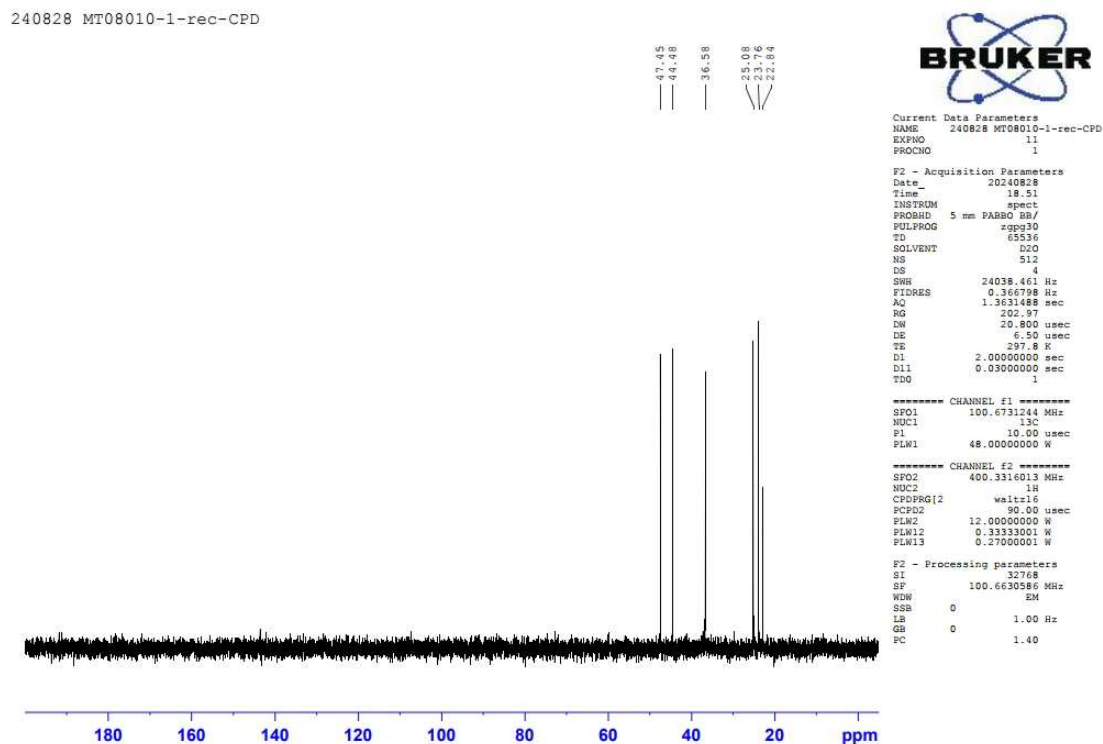



# NMR chart of 9

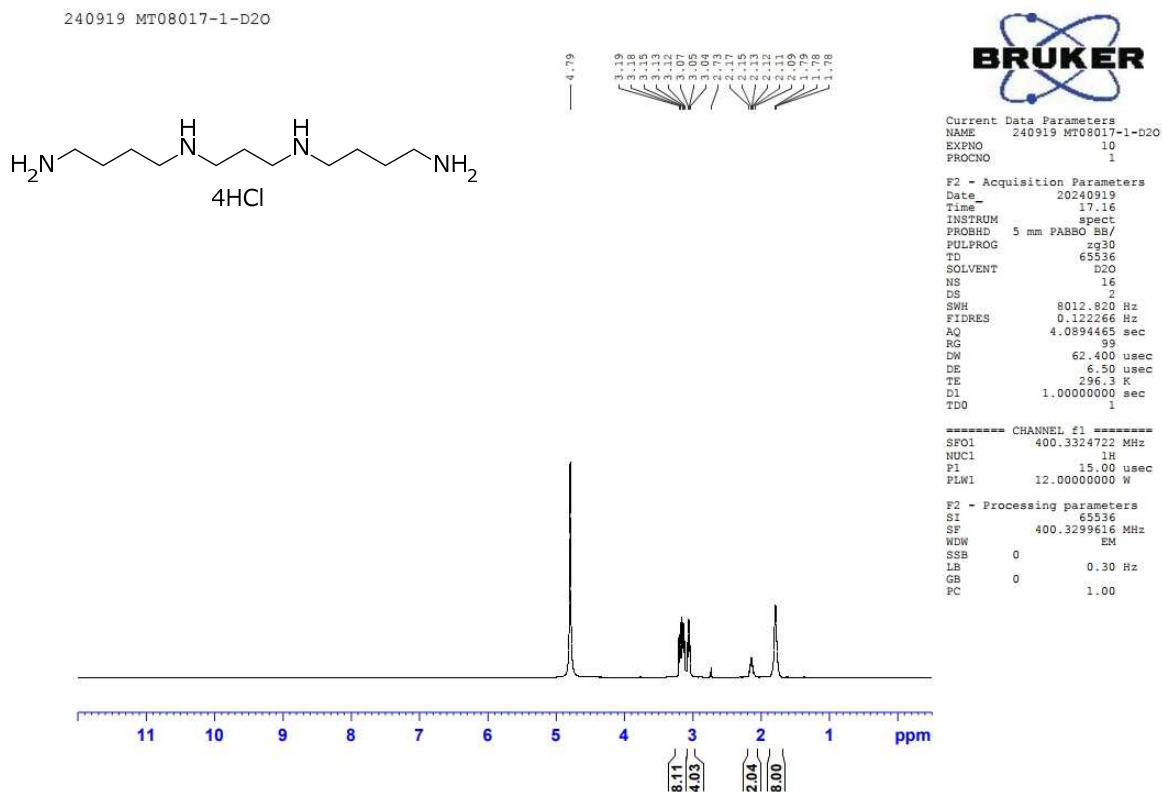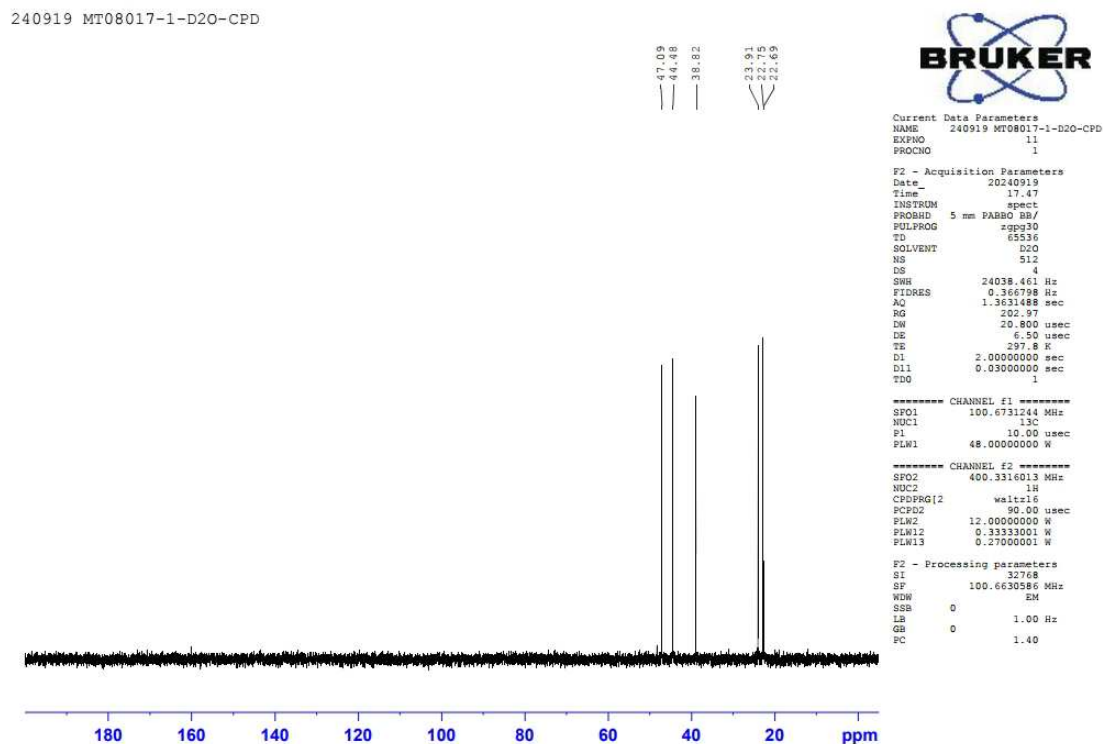

# NMR chart of 10

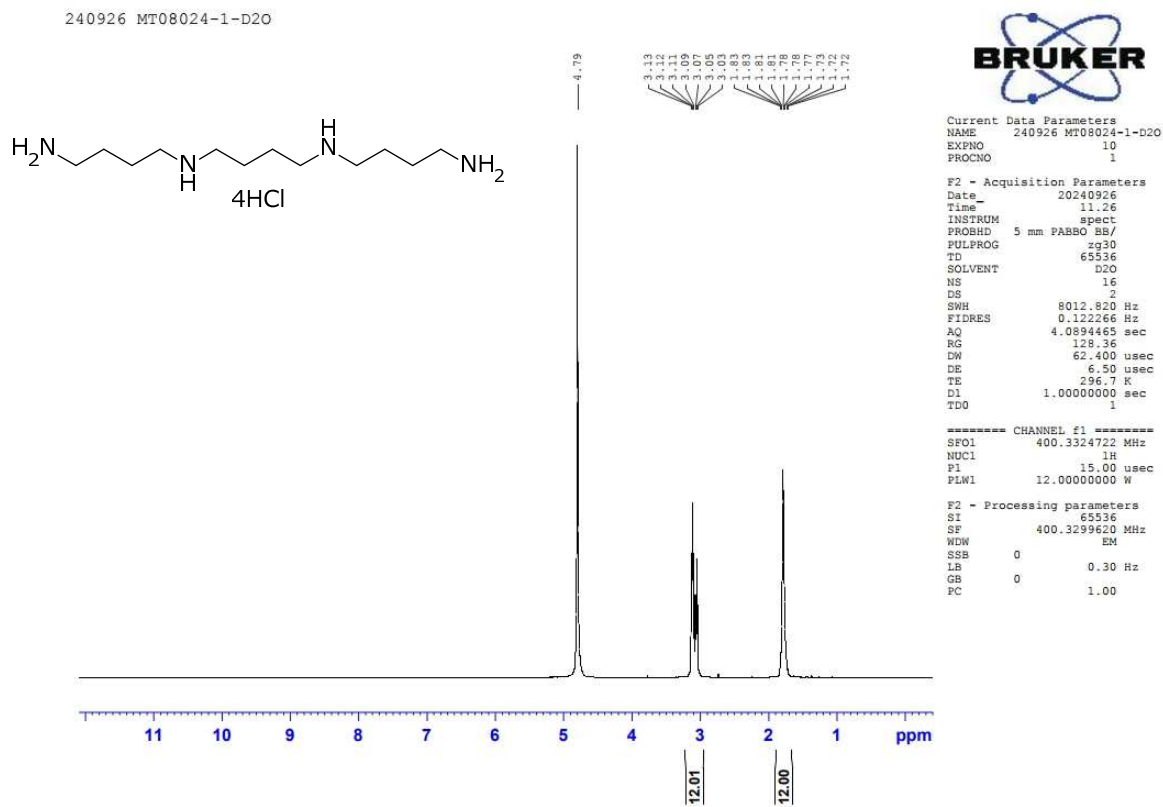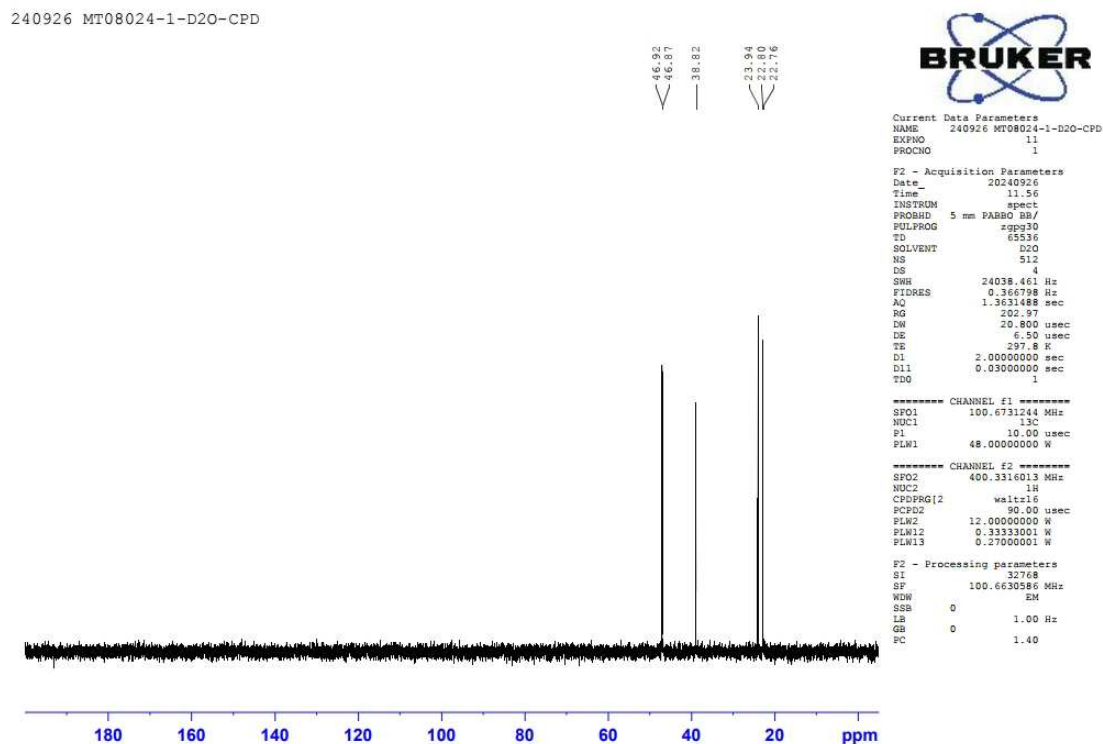

# NMR chart of **26a**

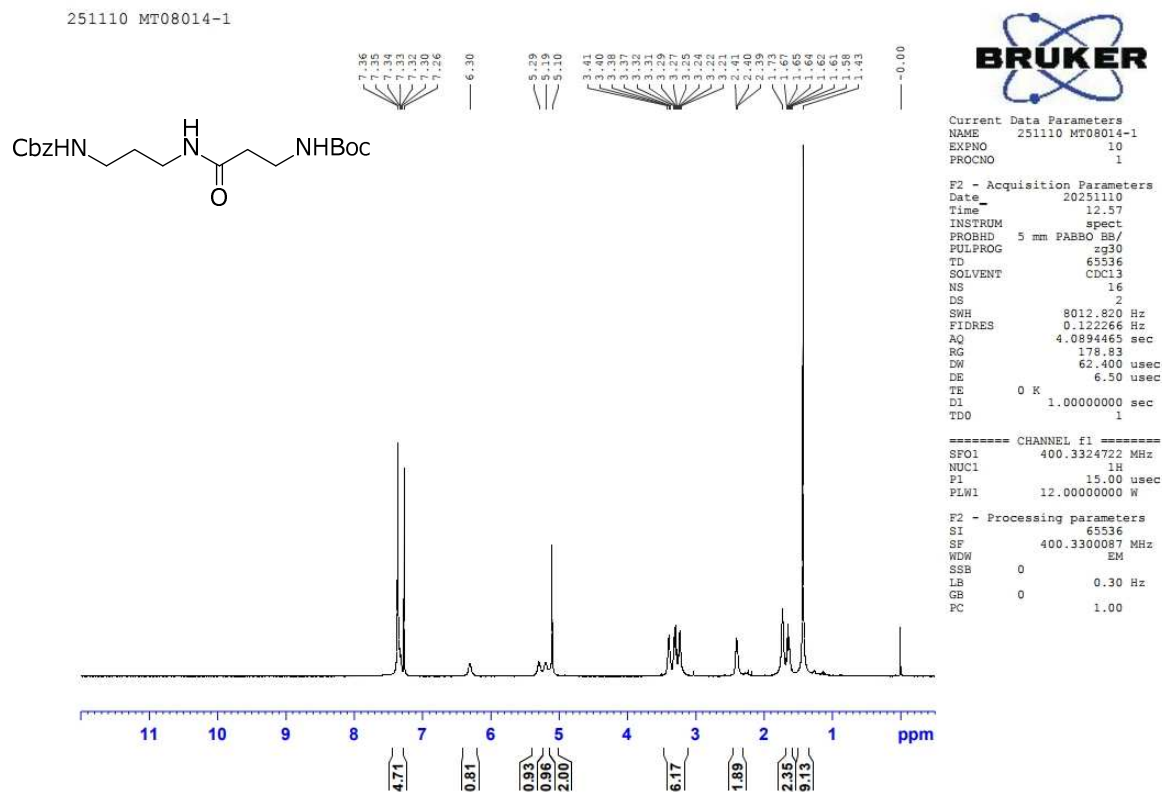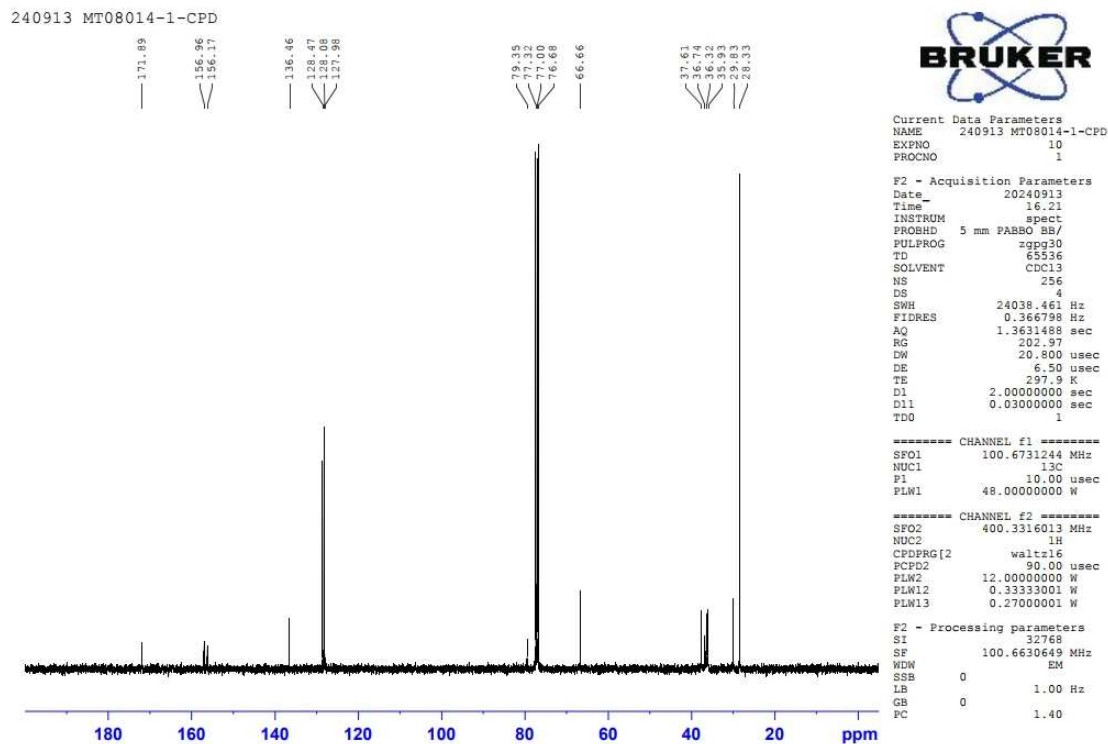

# NMR chart of **26b**

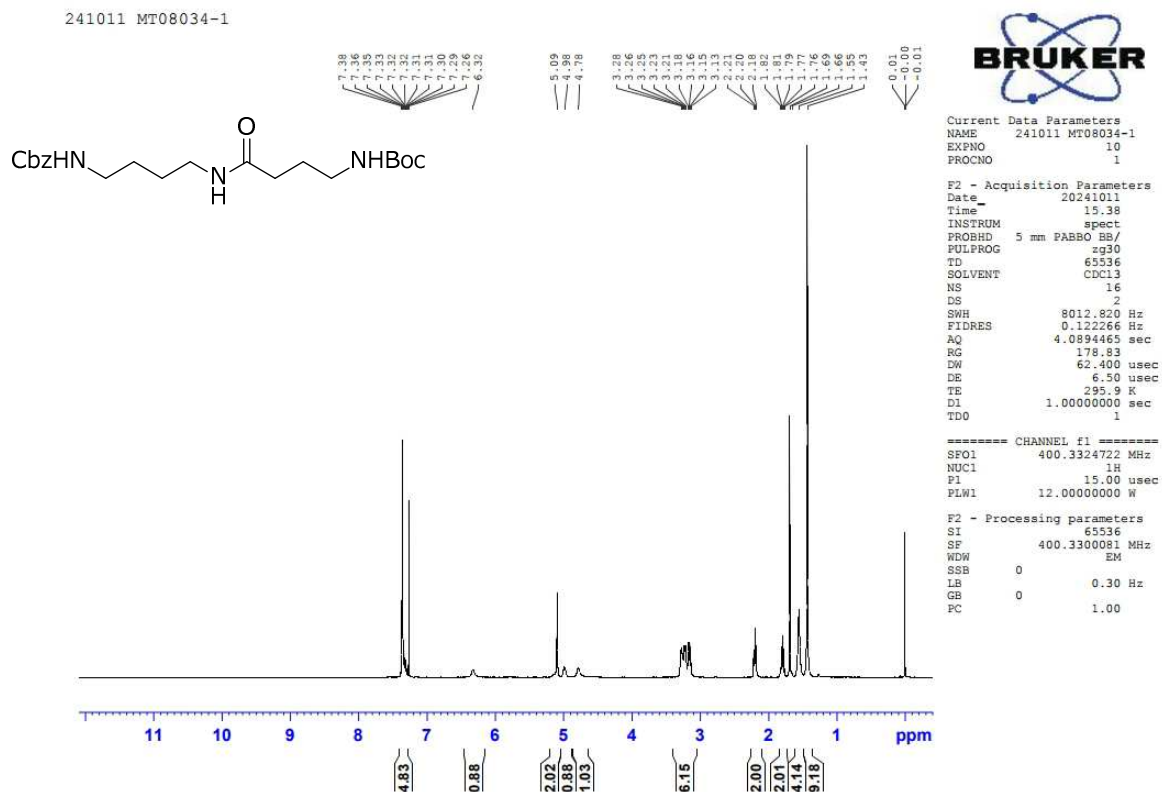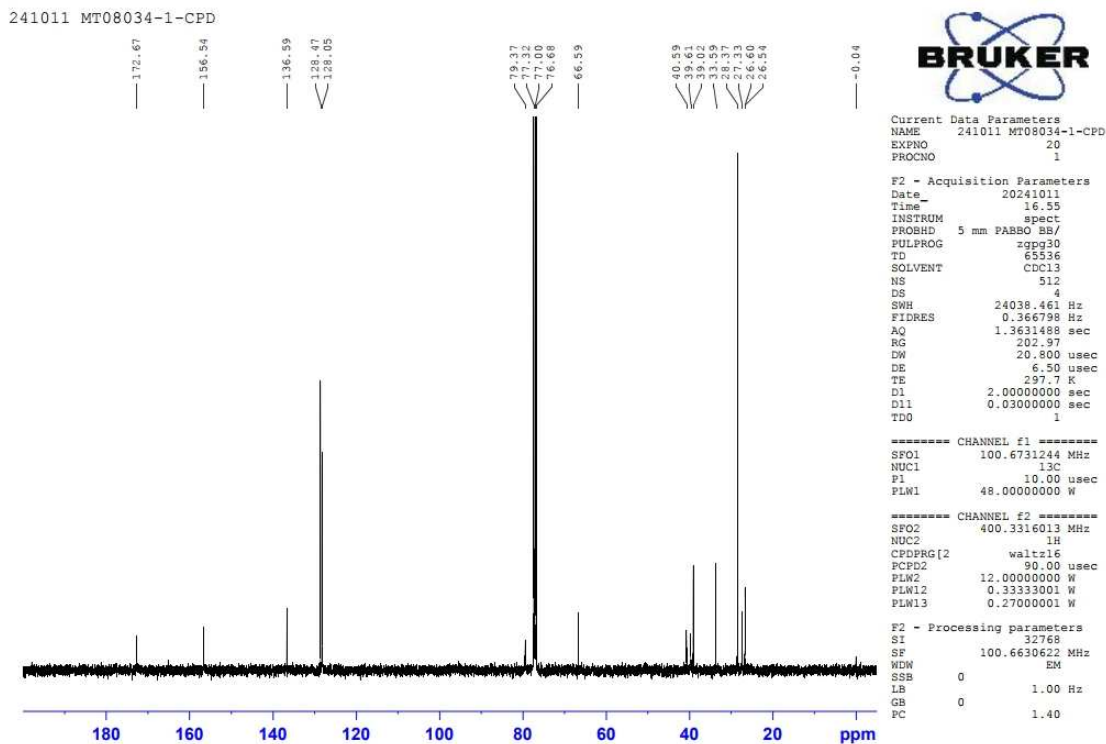

# NMR chart of **27a**

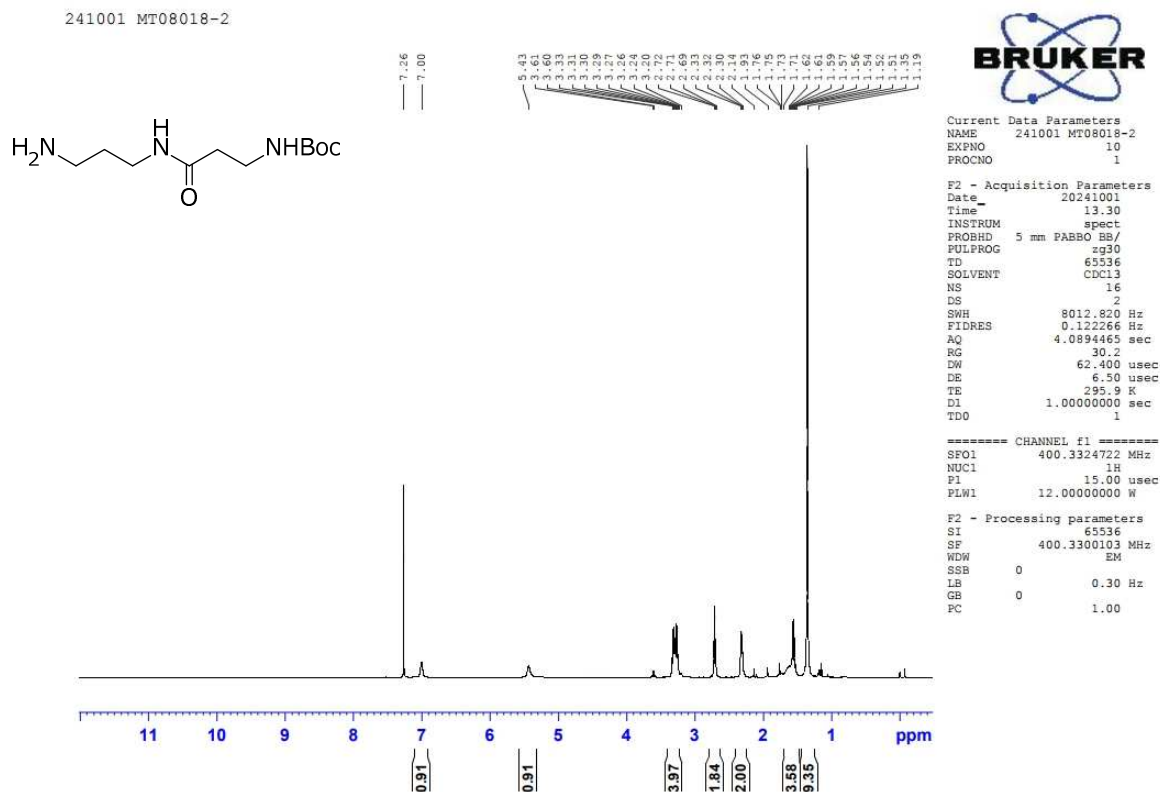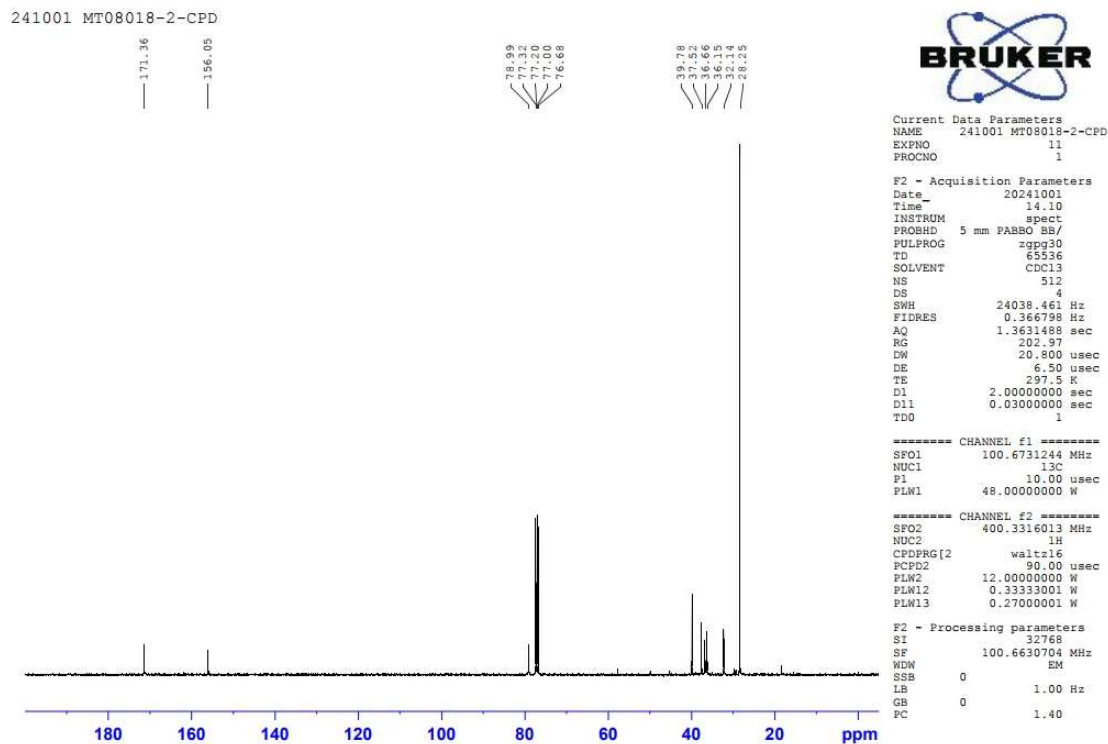

241015 MT08036-1

$\text{H}_2\text{N}-\text{CH}_2-\text{CH}_2-\text{CH}_2-\text{CH}_2-\text{NH}-\text{C}(=\text{O})-\text{CH}_2-\text{CH}_2-\text{CH}_2-\text{NH}-\text{Boc}$

Current Data Parameters  
 NAME 241015 MT08036-1  
 EXPNO 10  
 PROCNO 1  
 F2 - Acquisition Parameters  
 Date\_ 20241015  
 Time 17.18  
 INSTRUM spect  
 PROBHD 5 mm PABBO BB/  
 PULPROG zg30  
 TD 65536  
 SOLVENT CDC13  
 NS 16  
 DS 2  
 SWH 8012.820 Hz  
 FIDRES 0.122266 Hz  
 AQ 4.0894465 sec  
 RG 89.96  
 DW 62.400 usec  
 DE 6.50 usec  
 TE 296.0 K  
 D1 1.00000000 sec  
 TD0 1  
 ===== CHANNEL f1 =====  
 SFO1 400.3324722 MHz  
 NUC1 1H  
 P1 15.00 usec  
 PLW1 12.00000000 W  
 F2 - Processing parameters  
 SI 65536  
 SF 400.3300110 MHz  
 WDW EM  
 SSB 0  
 LB 0.30 Hz  
 GB 0  
 PC 1.00

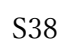

# NMR chart of **28a**

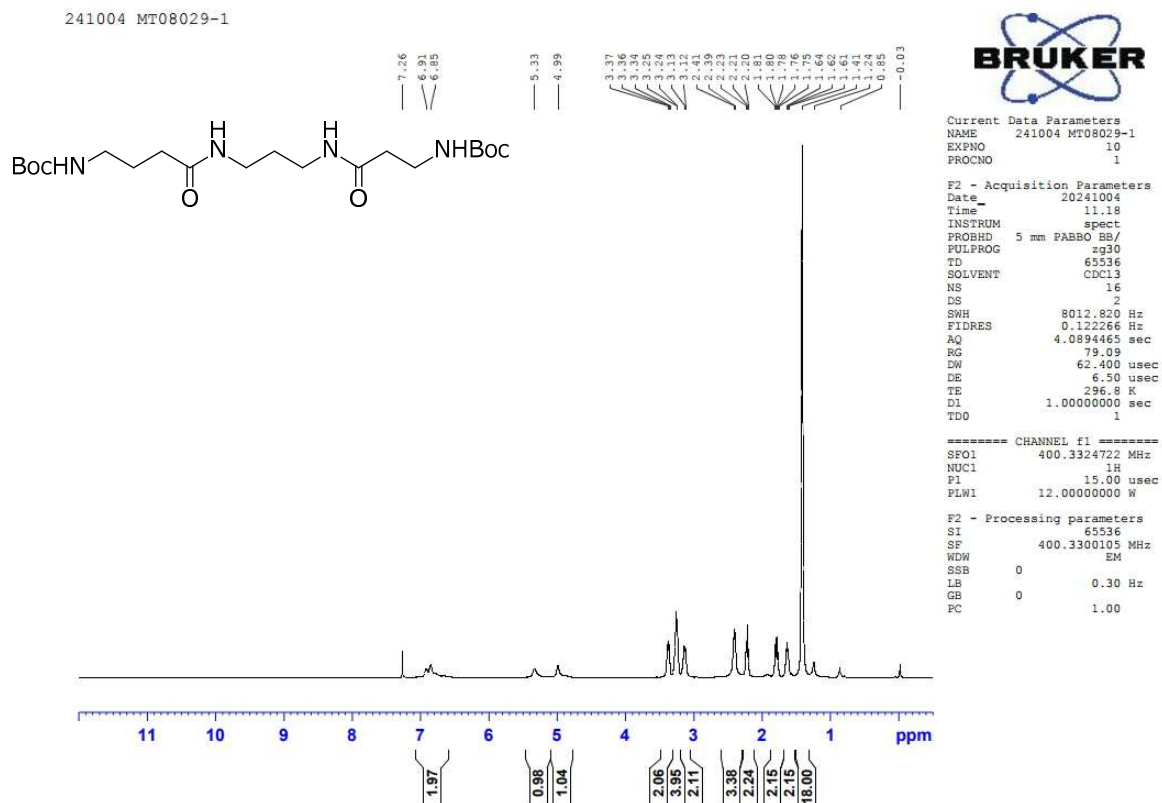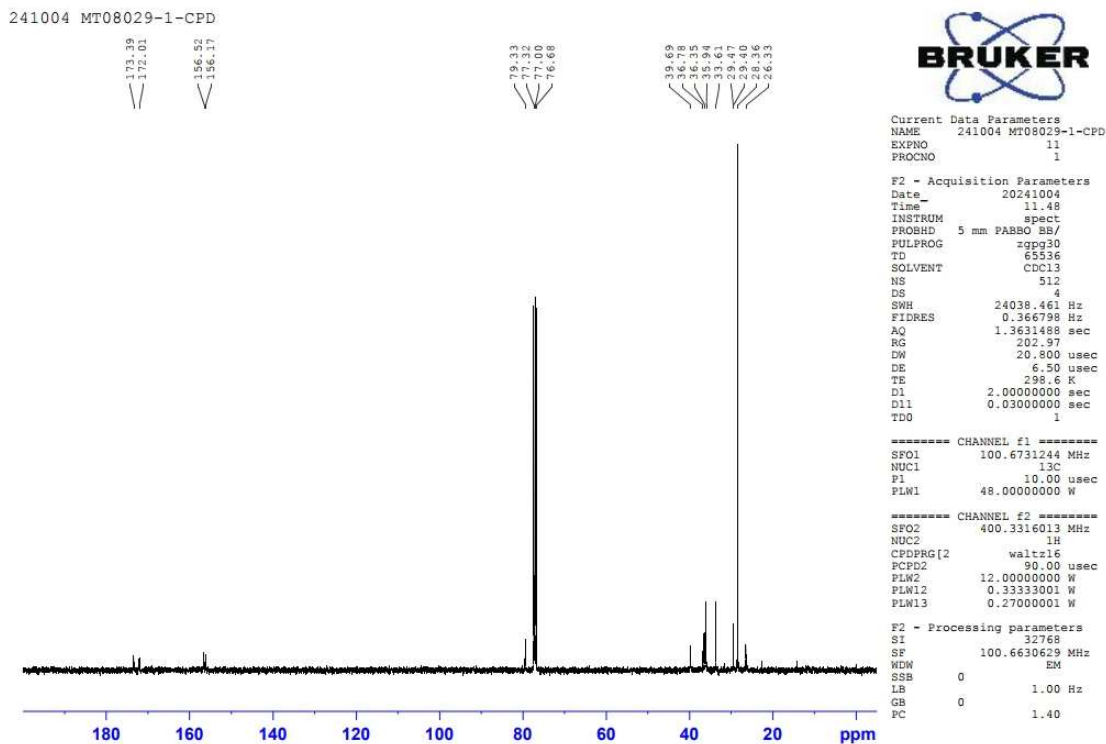



# NMR chart of **28b**

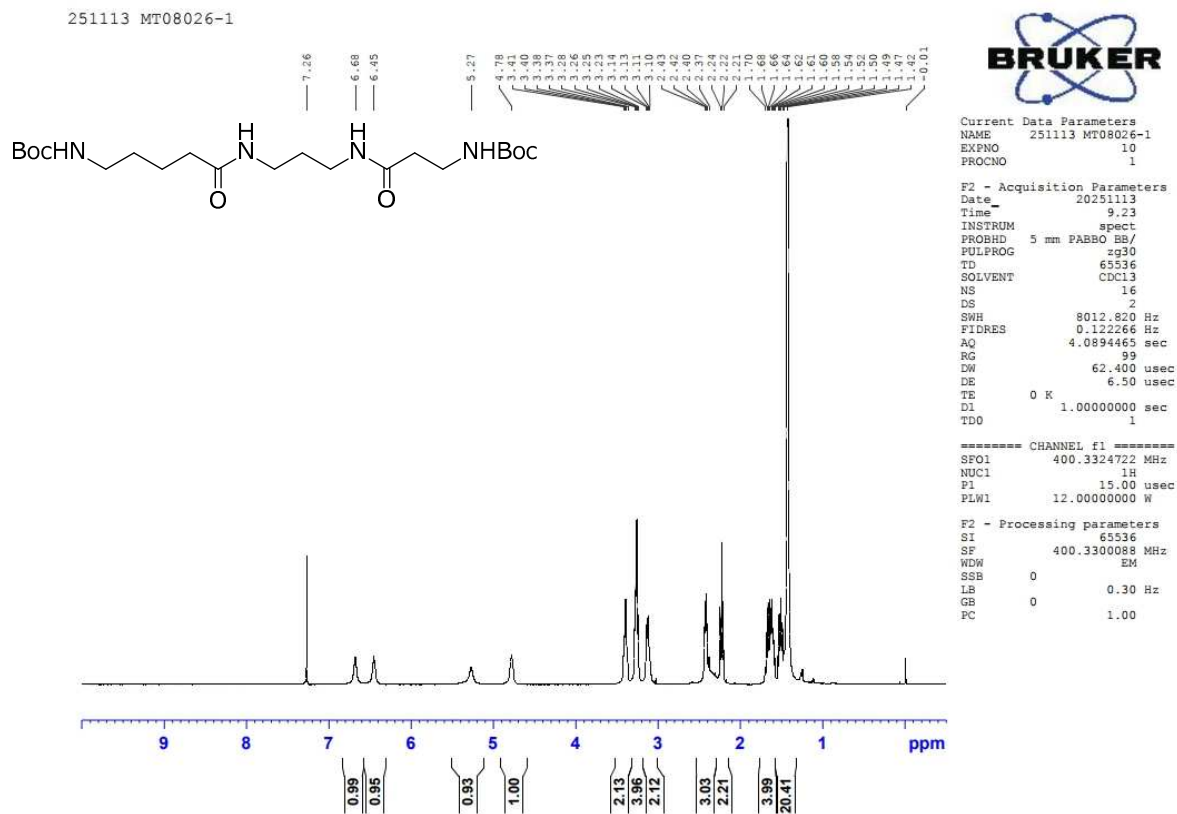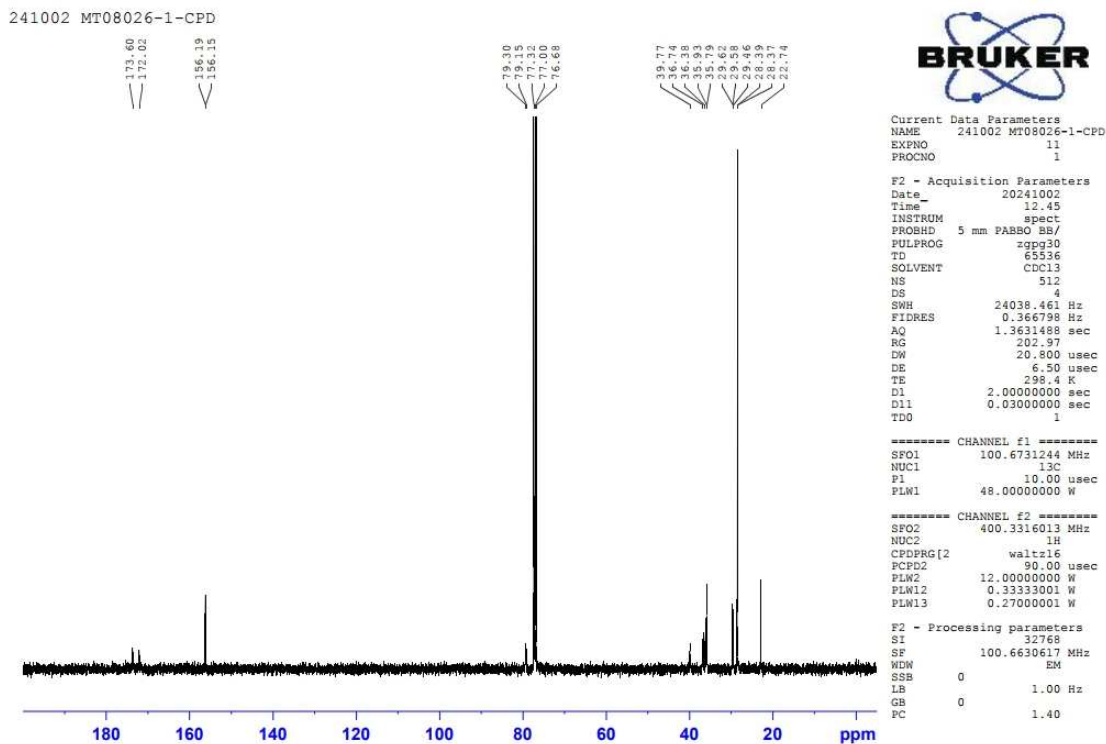



# NMR chart of **28c**

241016 MT08037-2

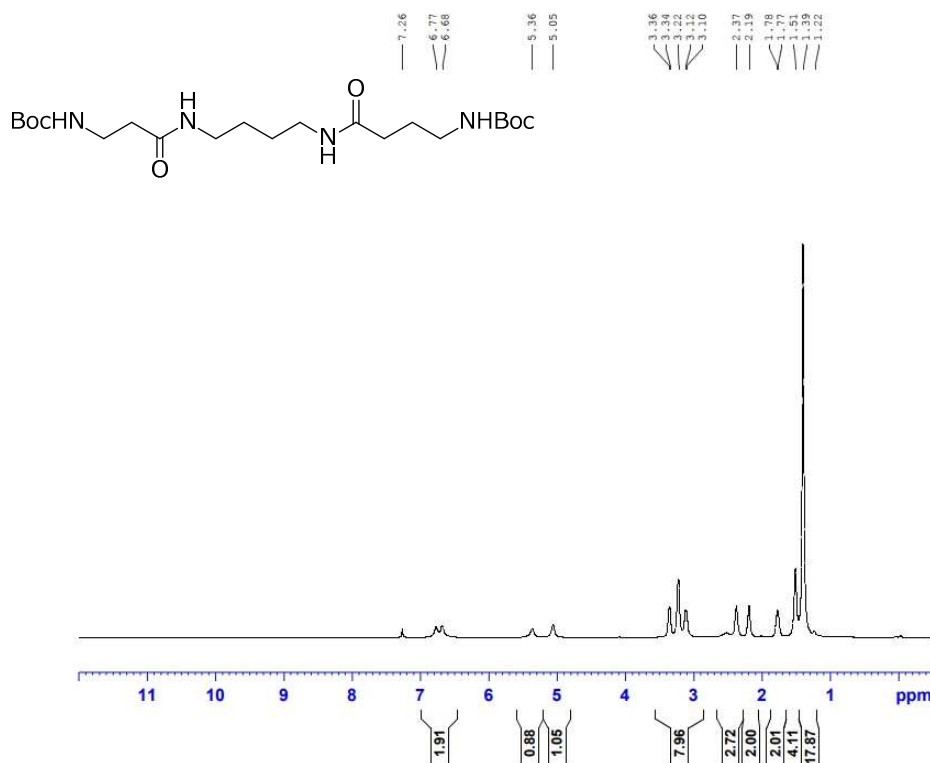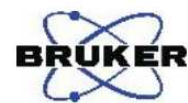

Current Data Parameters  
NAME 241016 MT08037-2  
EXPNO 12  
PROCNO 1

F2 - Acquisition Parameters  
Date\_ 20241016  
Time 15.46  
INSTRUM spect  
PROBHD 5 mm PABBO BB/  
PULPROG zg30  
TD 65536  
SOLVENT CDCl<sub>3</sub>  
NS 64  
DS 2  
SWH 8012.820 Hz  
FIDRES 0.122266 Hz  
AQ 4.0894465 sec  
RG 49.9  
DW 62.400 usec  
DE 6.50 usec  
TE 296.0 K  
D1 1.00000000 sec  
TDO 1

===== CHANNEL f1 =====  
SFO1 400.3324722 MHz  
NUC1 1H  
P1 15.00 usec  
PLW1 12.00000000 W

F2 - Processing parameters  
SI 65536  
SF 400.3300105 MHz  
WDW EM  
SSB 0  
LB 0.30 Hz  
GB 0  
PC 1.00

241016 MT08037-2-CPD

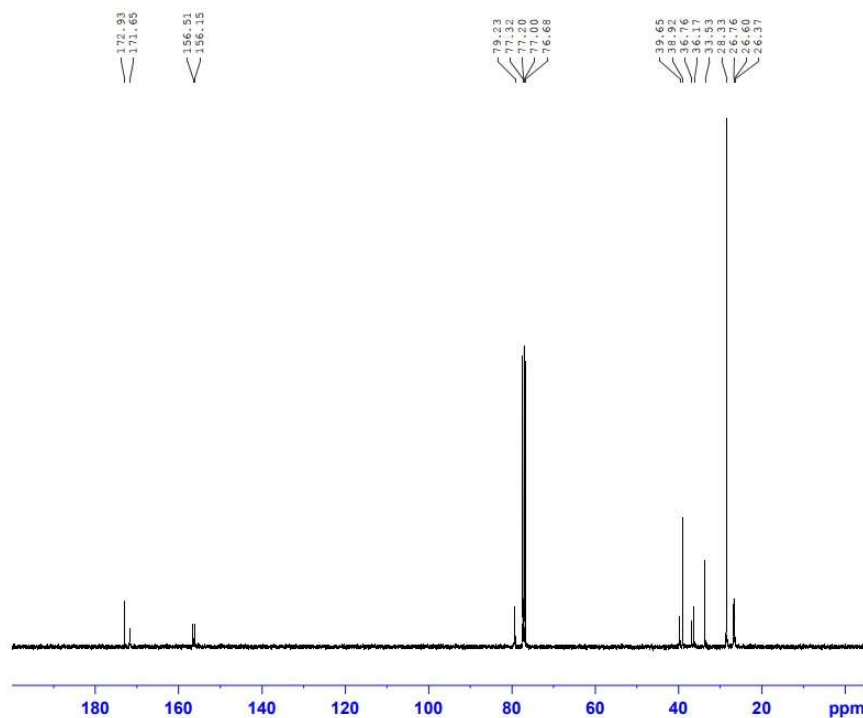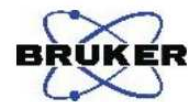

Current Data Parameters  
NAME 241016 MT08037-2-CPD  
EXPNO 14  
PROCNO 1

F2 - Acquisition Parameters  
Date\_ 20241016  
Time 16.17  
INSTRUM spect  
PROBHD 5 mm PABBO BB/  
PULPROG zgpg30  
TD 65536  
SOLVENT CDCl<sub>3</sub>  
NS 512  
DS 4  
SWH 24038.461 Hz  
FIDRES 0.366798 Hz  
AQ 1.3631488 sec  
RG 202.97  
DW 20.800 usec  
DE 6.50 usec  
TE 297.7 K  
D1 2.00000000 sec  
D11 0.03000000 sec  
TDO 1

===== CHANNEL f1 =====  
SFO1 100.6731244 MHz  
NUC1 13C  
P1 10.00 usec  
PLW1 48.00000000 W

===== CHANNEL f2 =====  
SFO2 400.3316013 MHz  
NUC2 1H  
CPDPRG2 waltz16  
PCPD2 90.00 usec  
PLW2 12.00000000 W  
PLW12 0.33330001 W  
PLW13 0.27000001 W

F2 - Processing parameters  
SI 32768  
SF 100.6630654 MHz  
WDW EM  
SSB 0  
LB 1.00 Hz  
GB 0  
PC 1.40

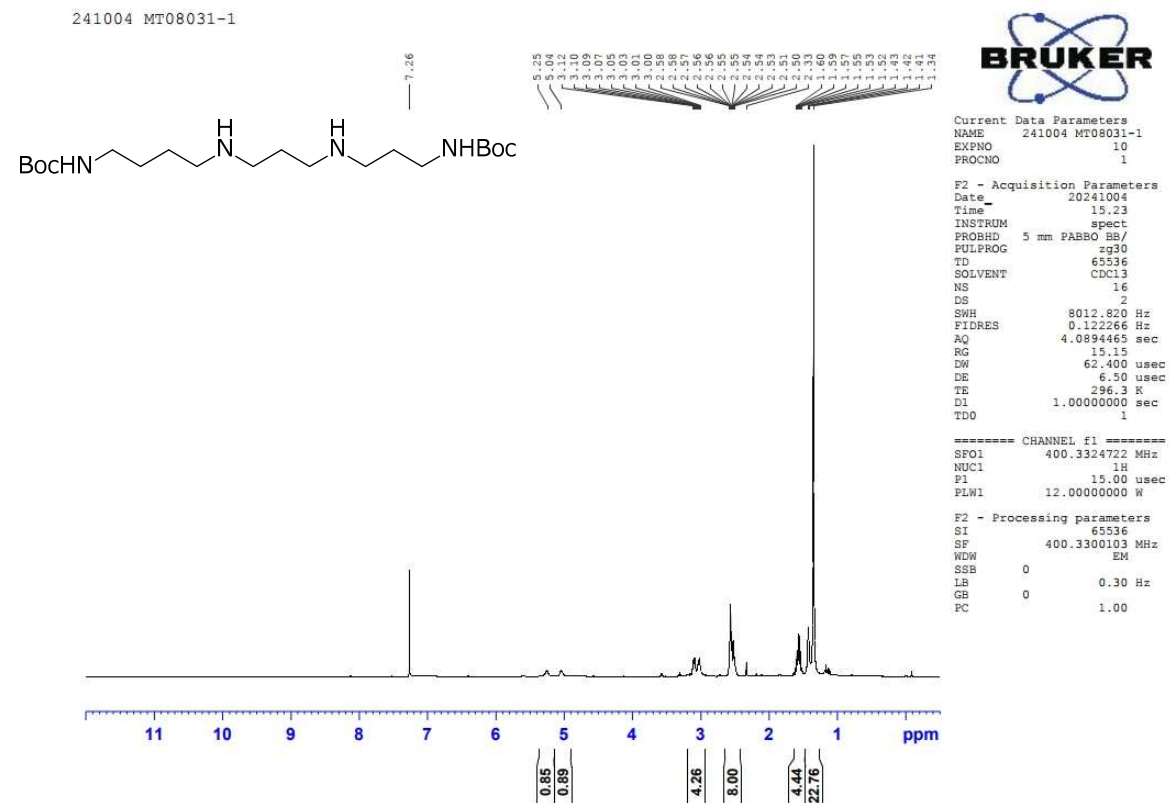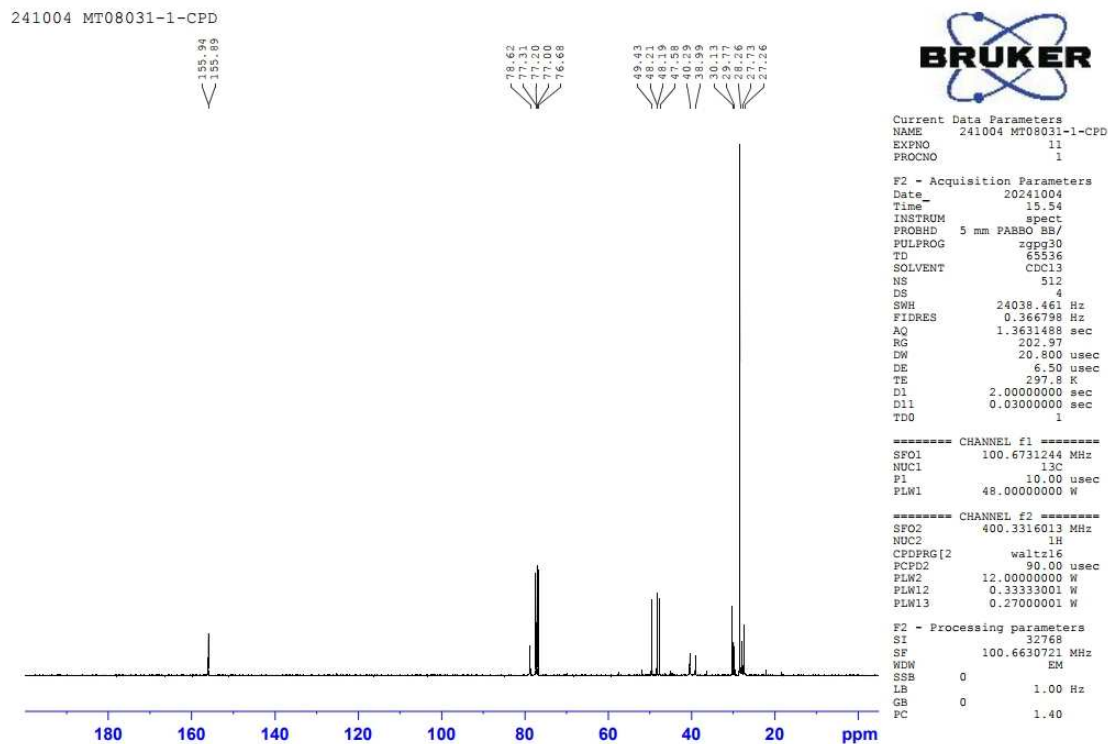

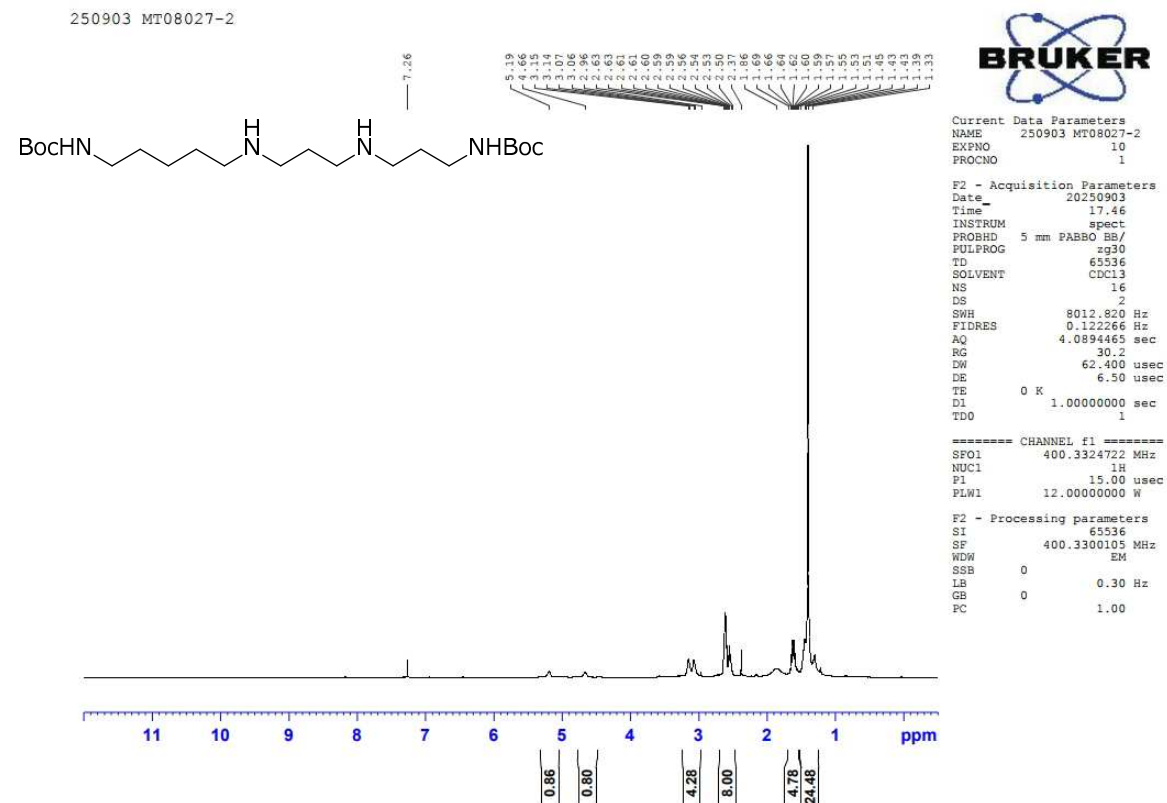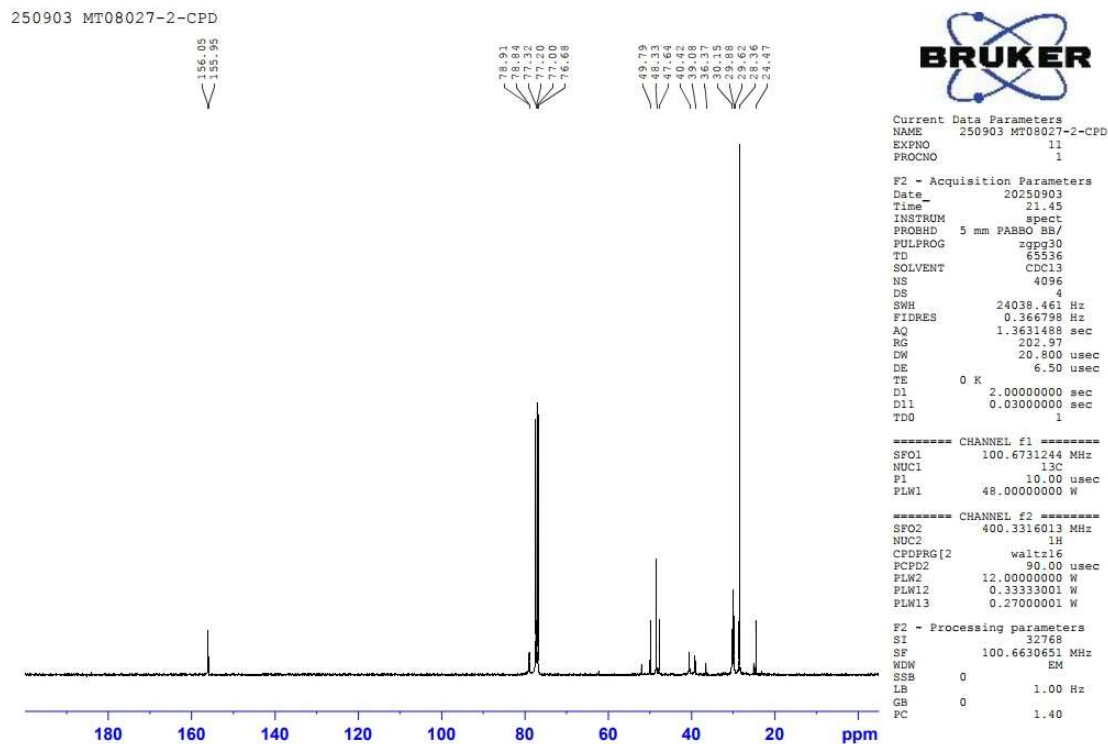

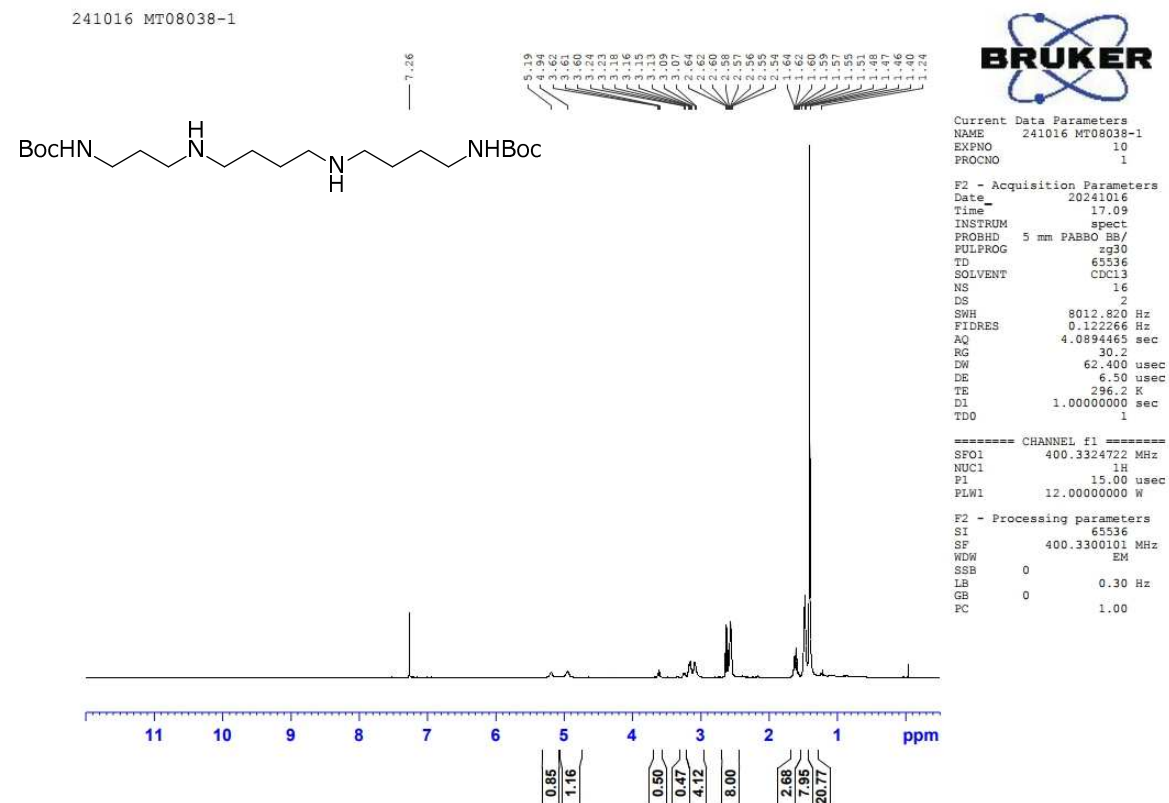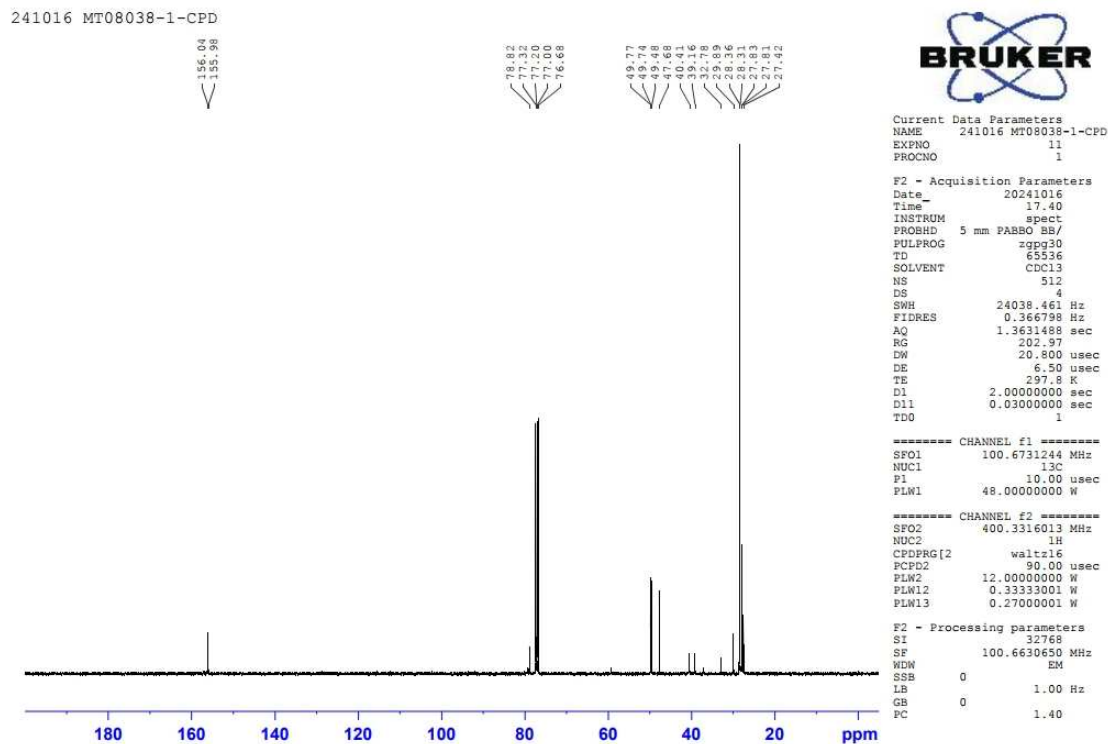

# NMR chart of 11

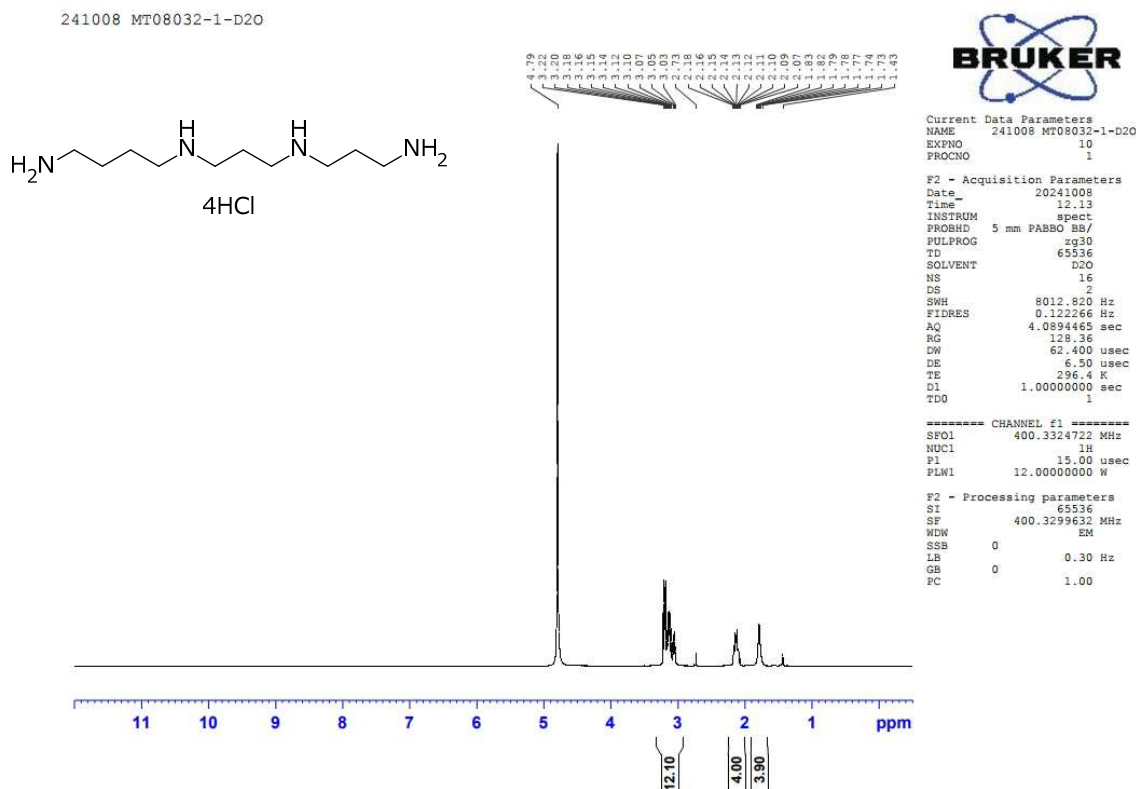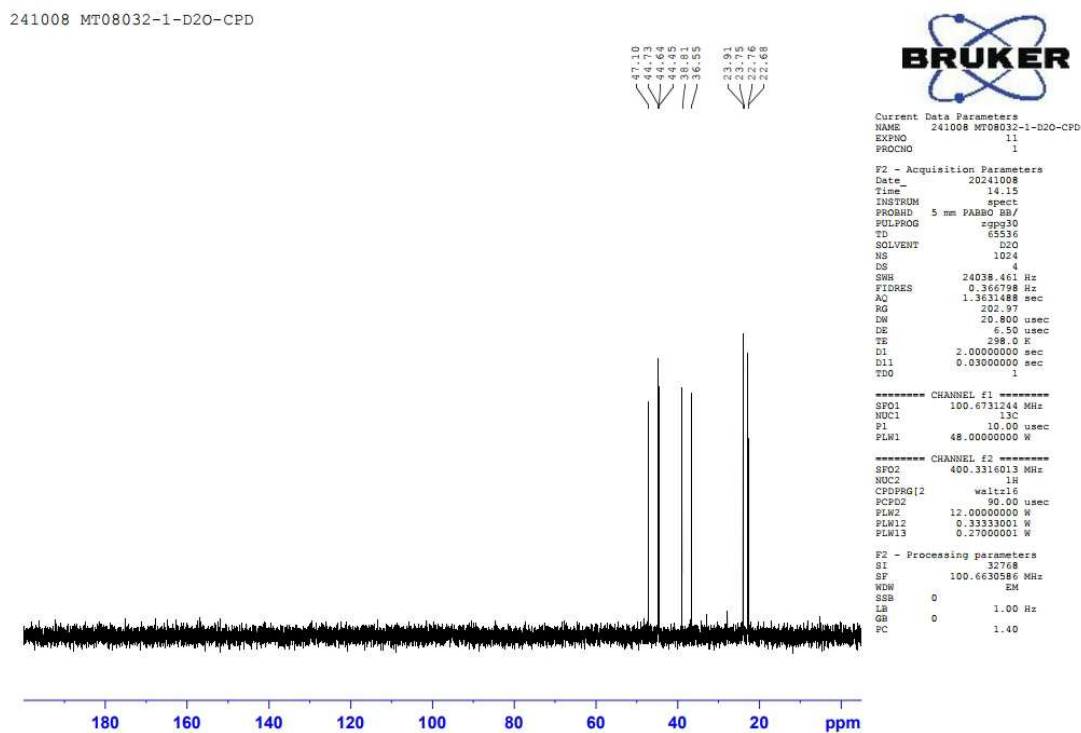

# NMR chart of 12

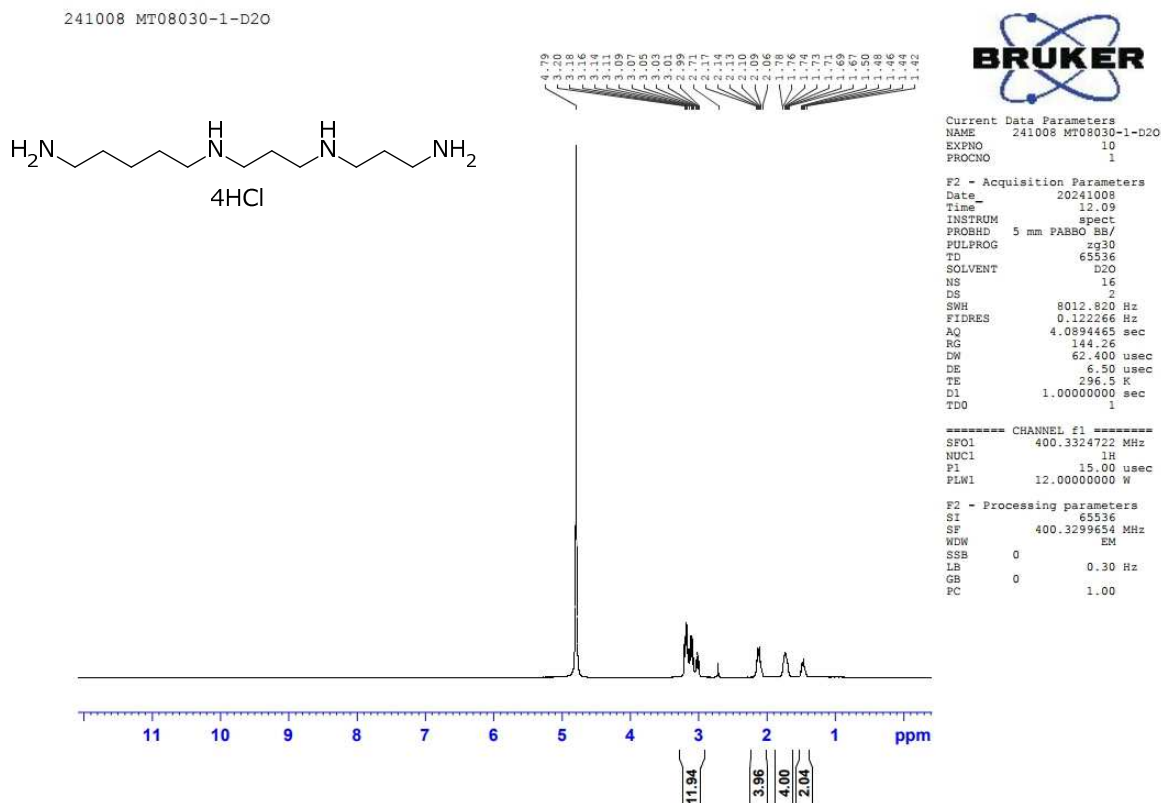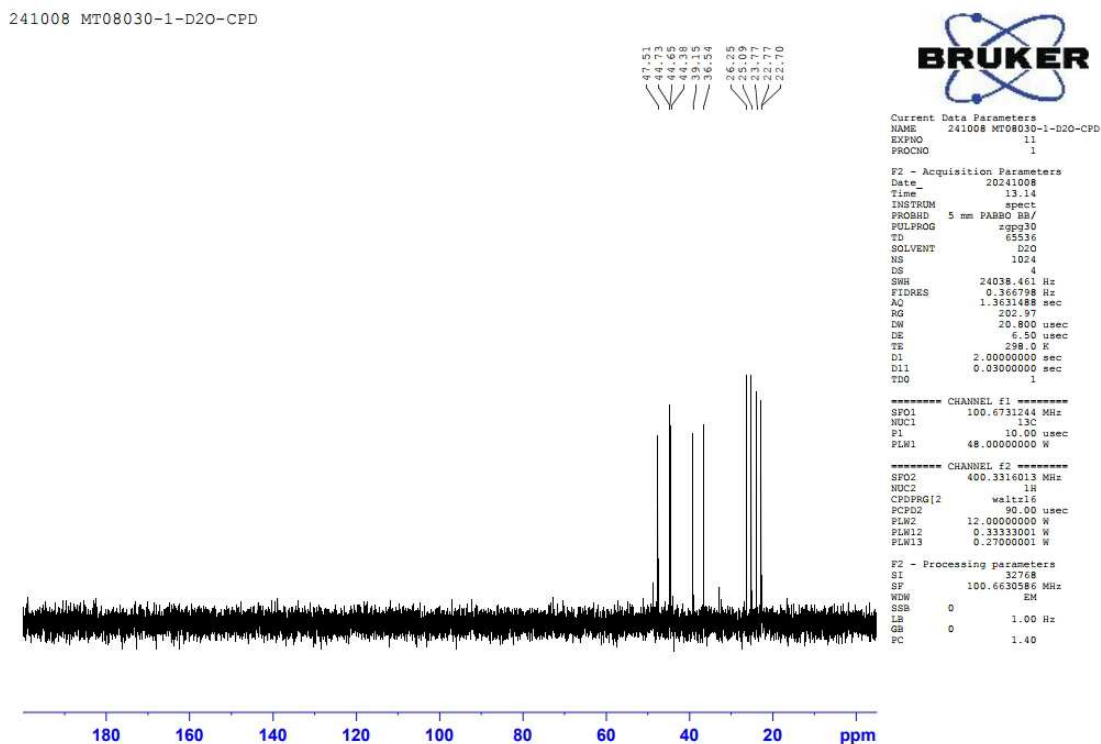

# NMR chart of 13

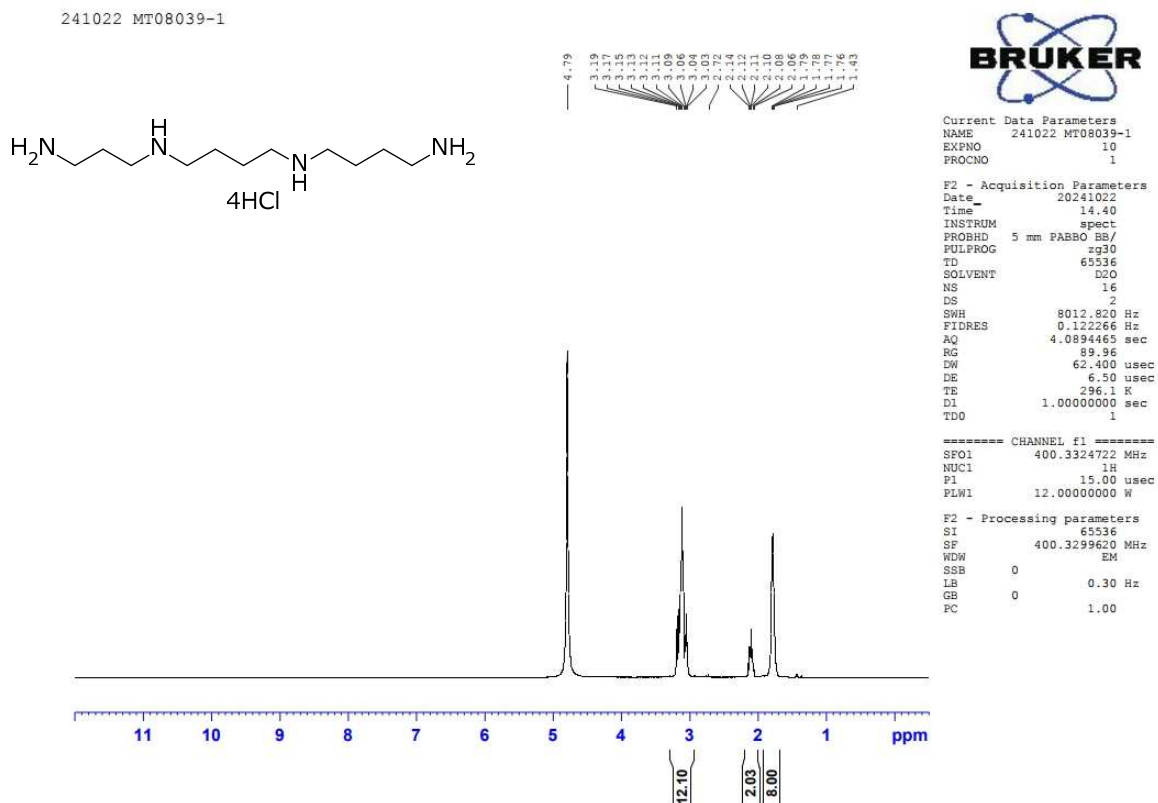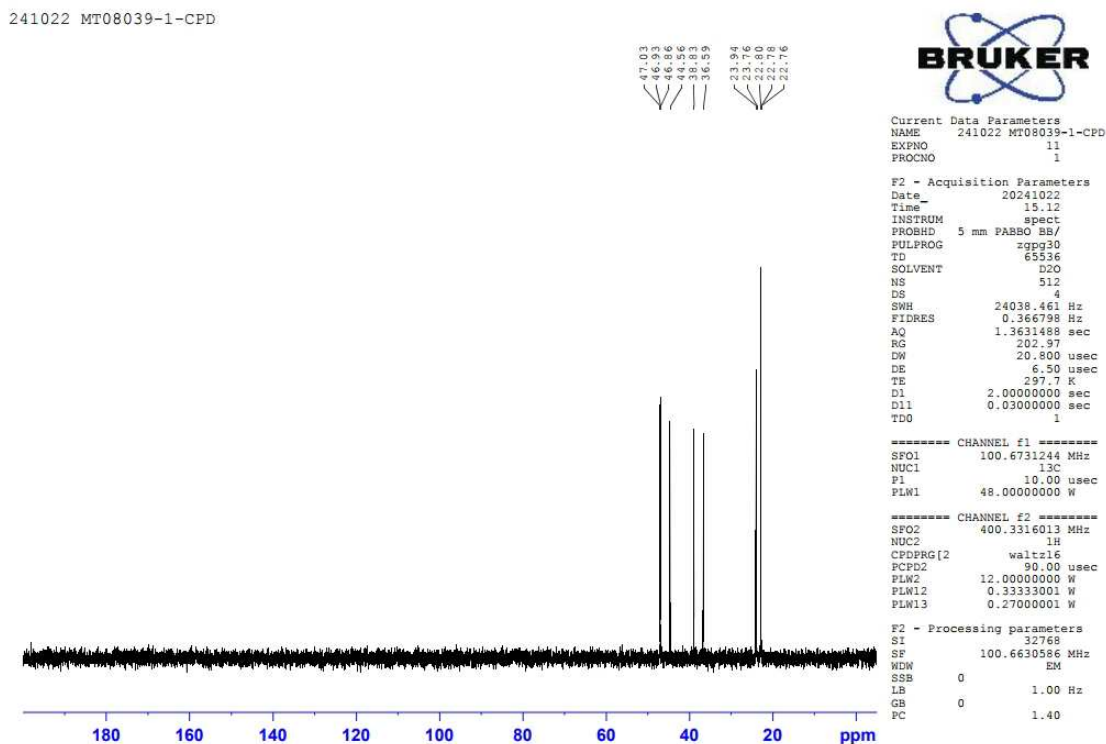



# NMR chart of **31**

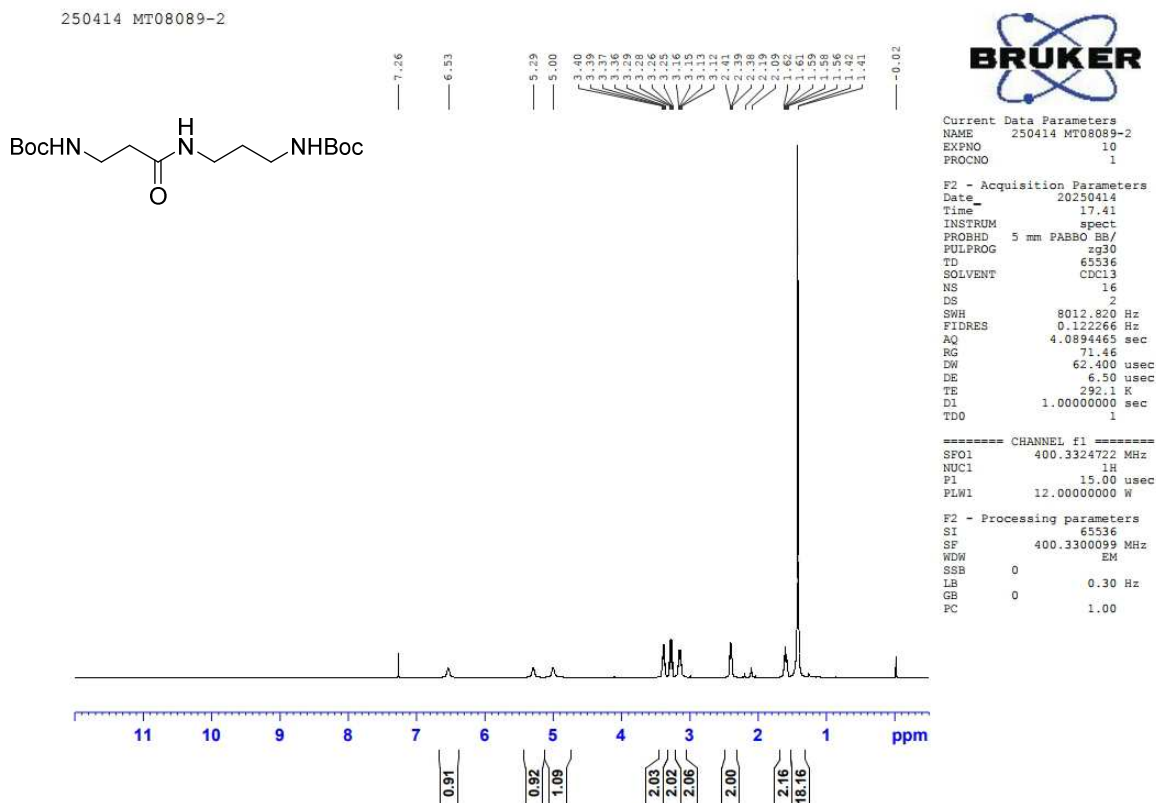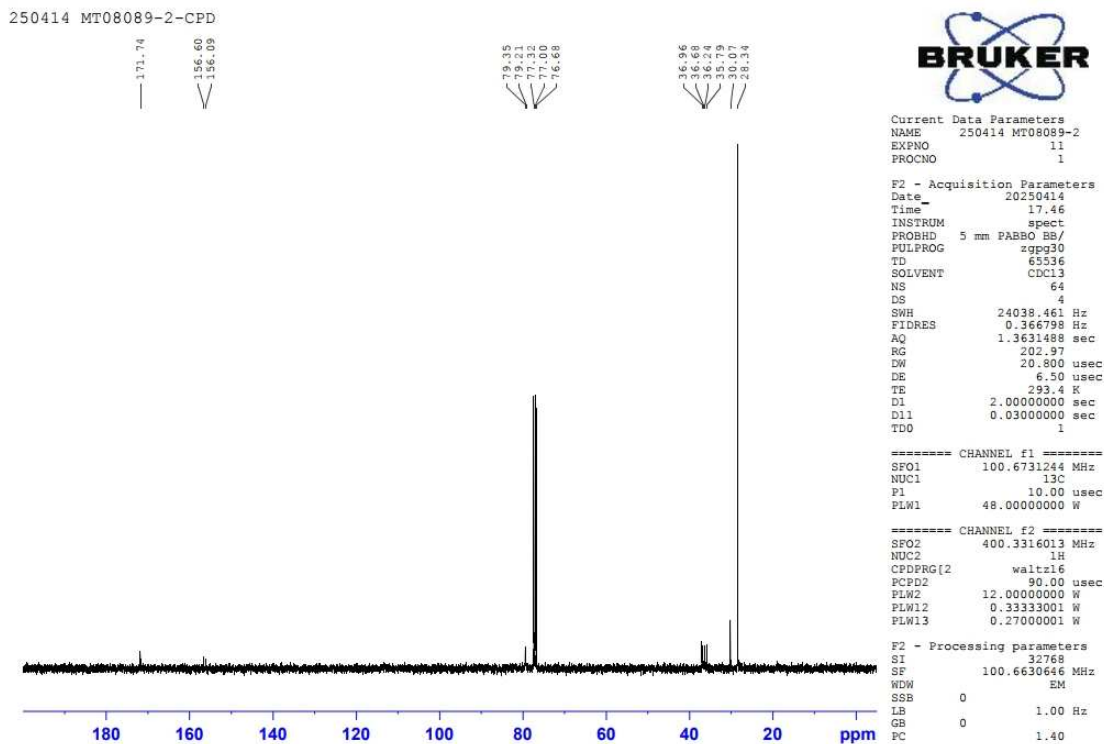



# NMR chart of **32**

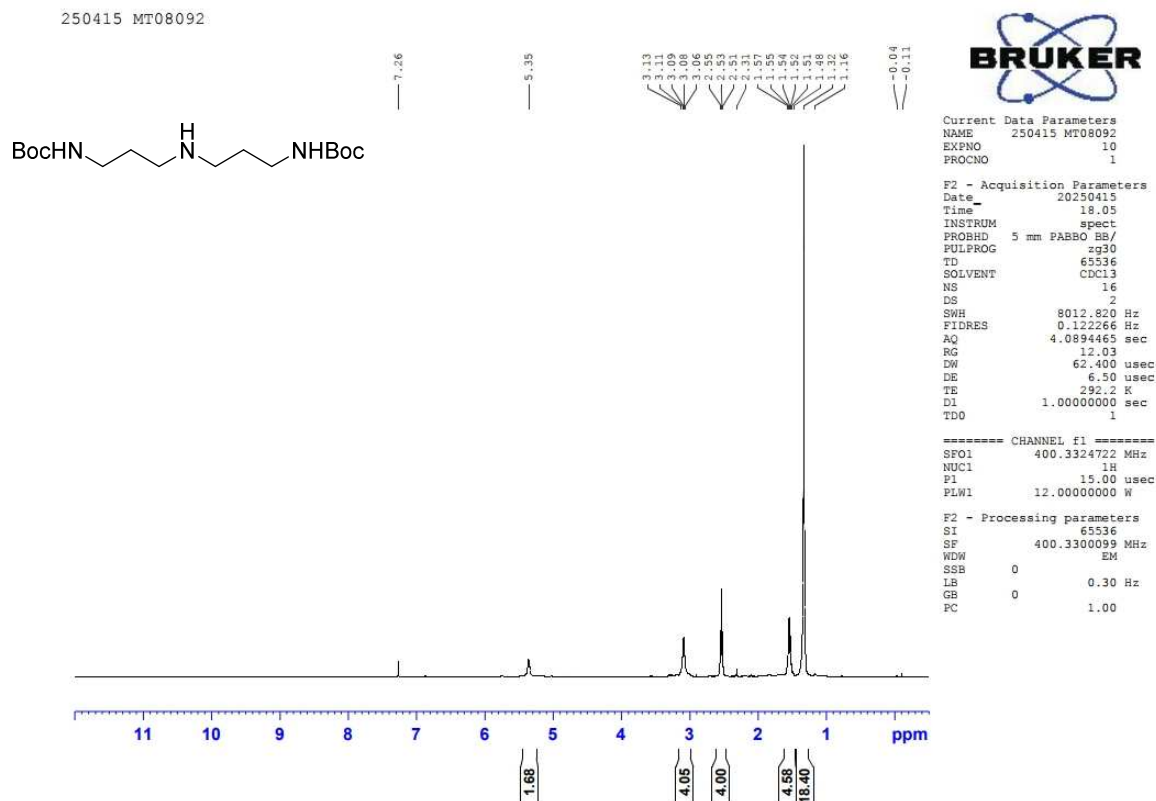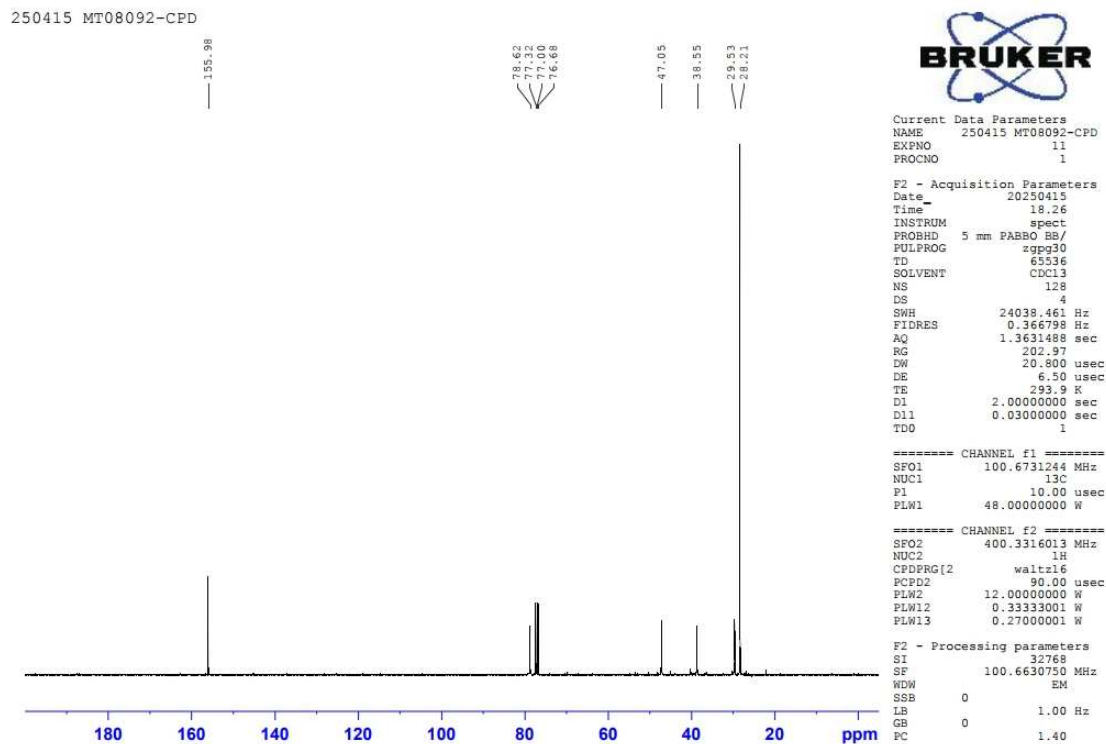

# NMR chart of 1

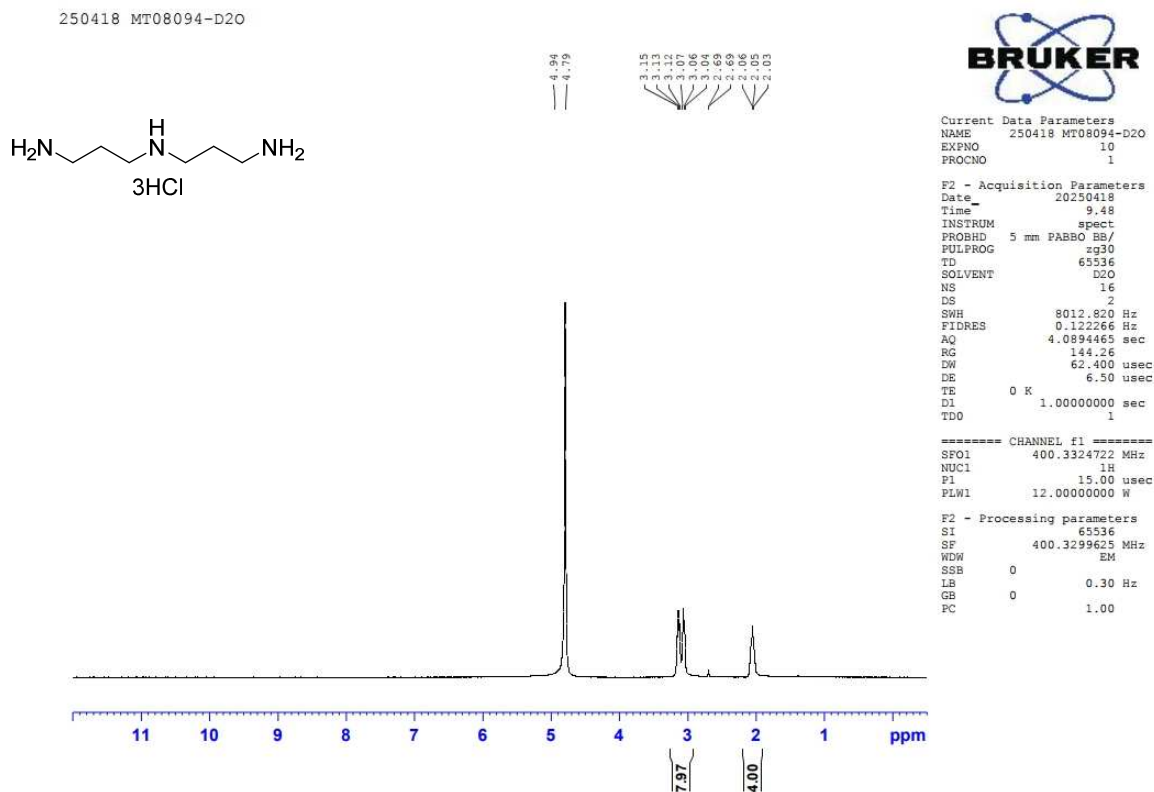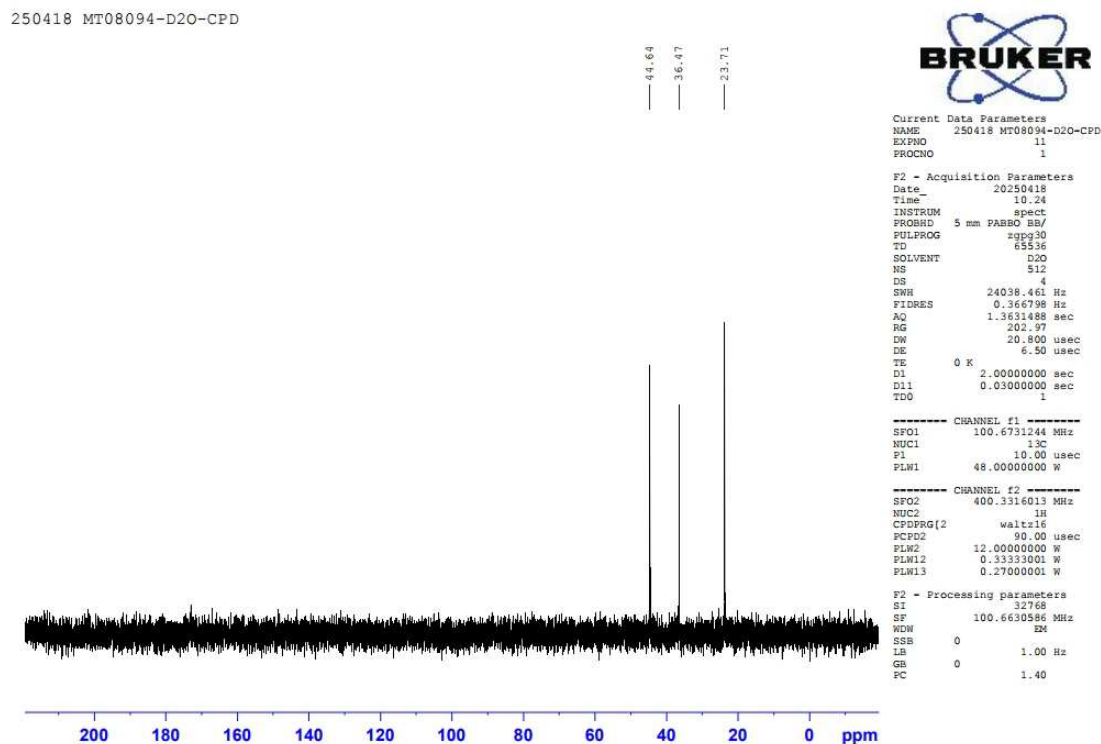

# NMR chart of **33**

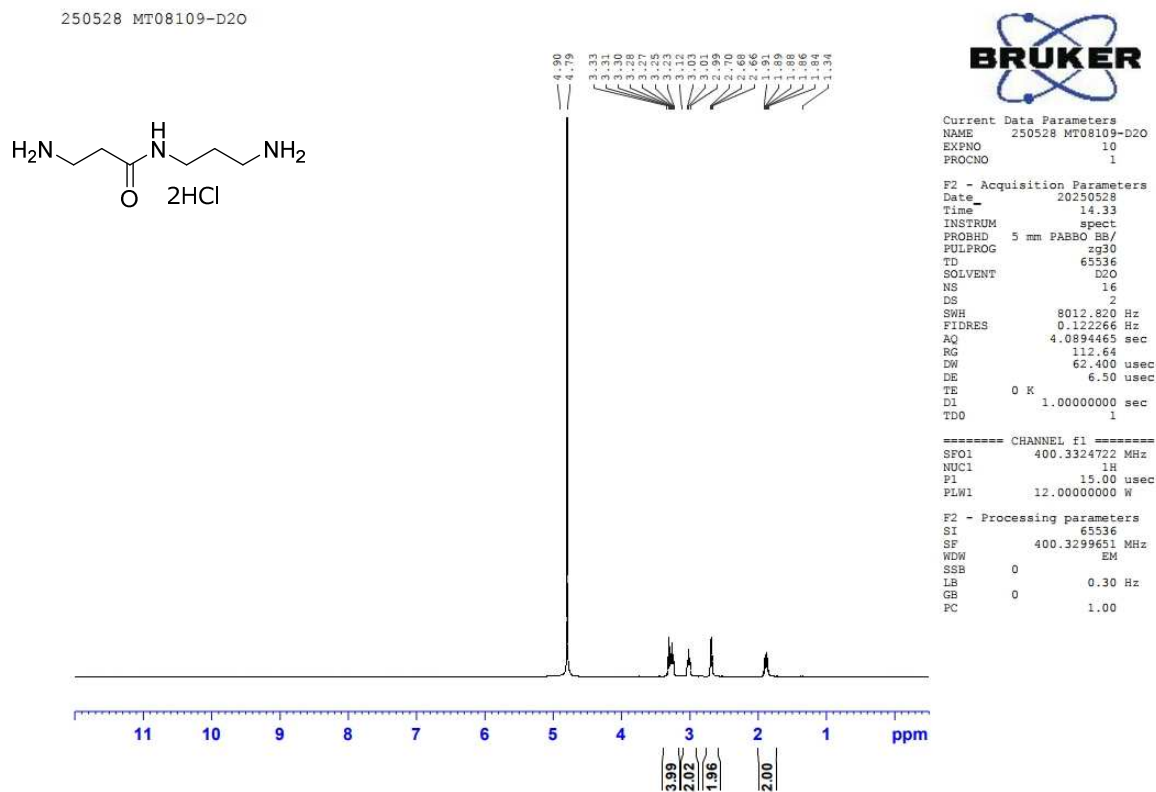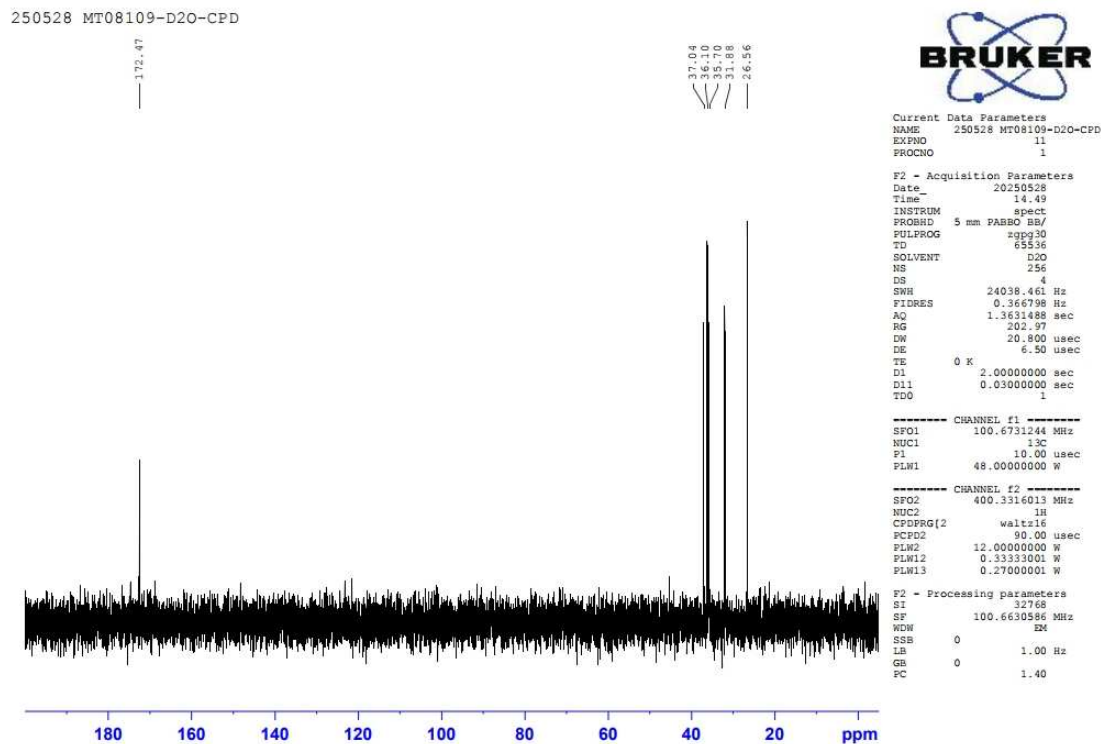

# NMR chart of **34**

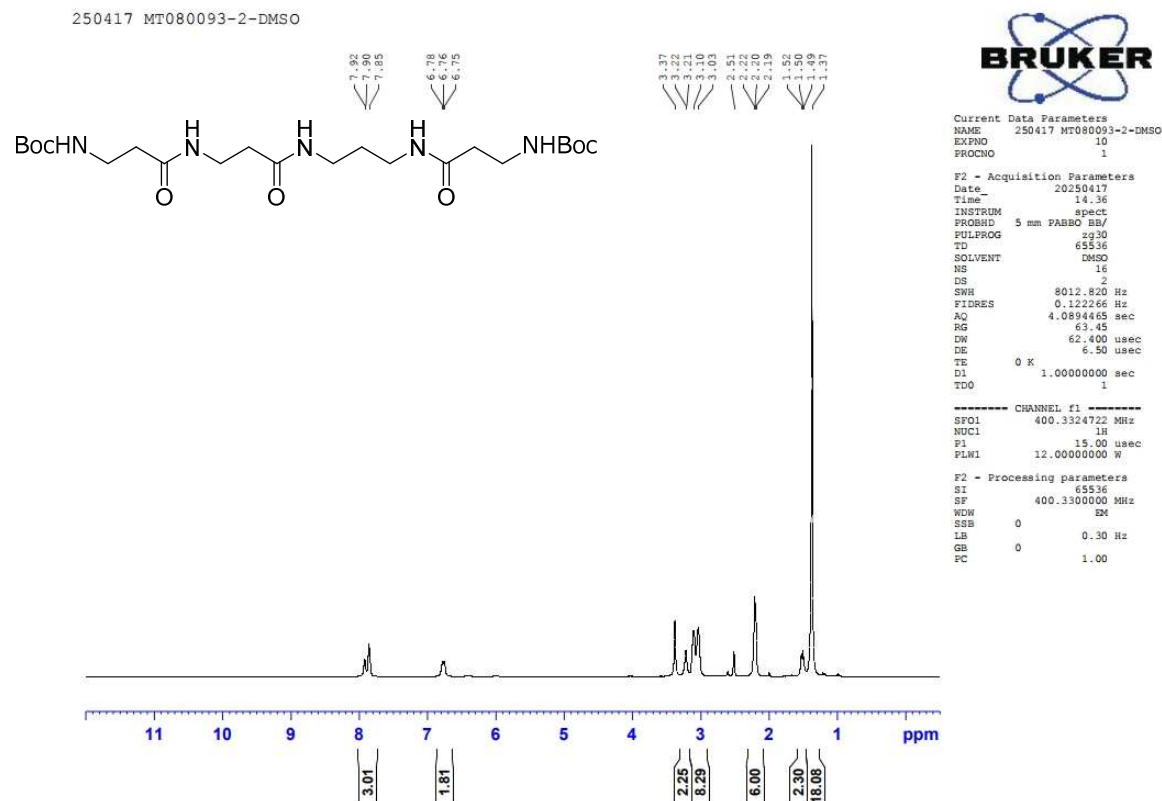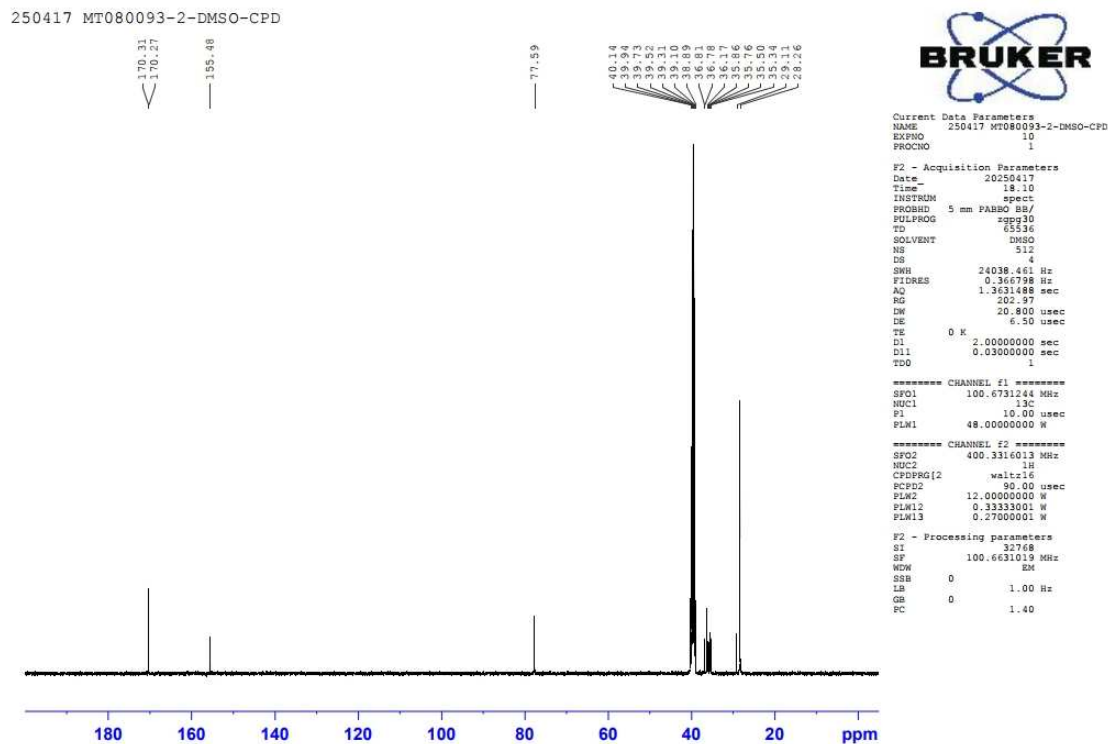

# NMR chart of **35**

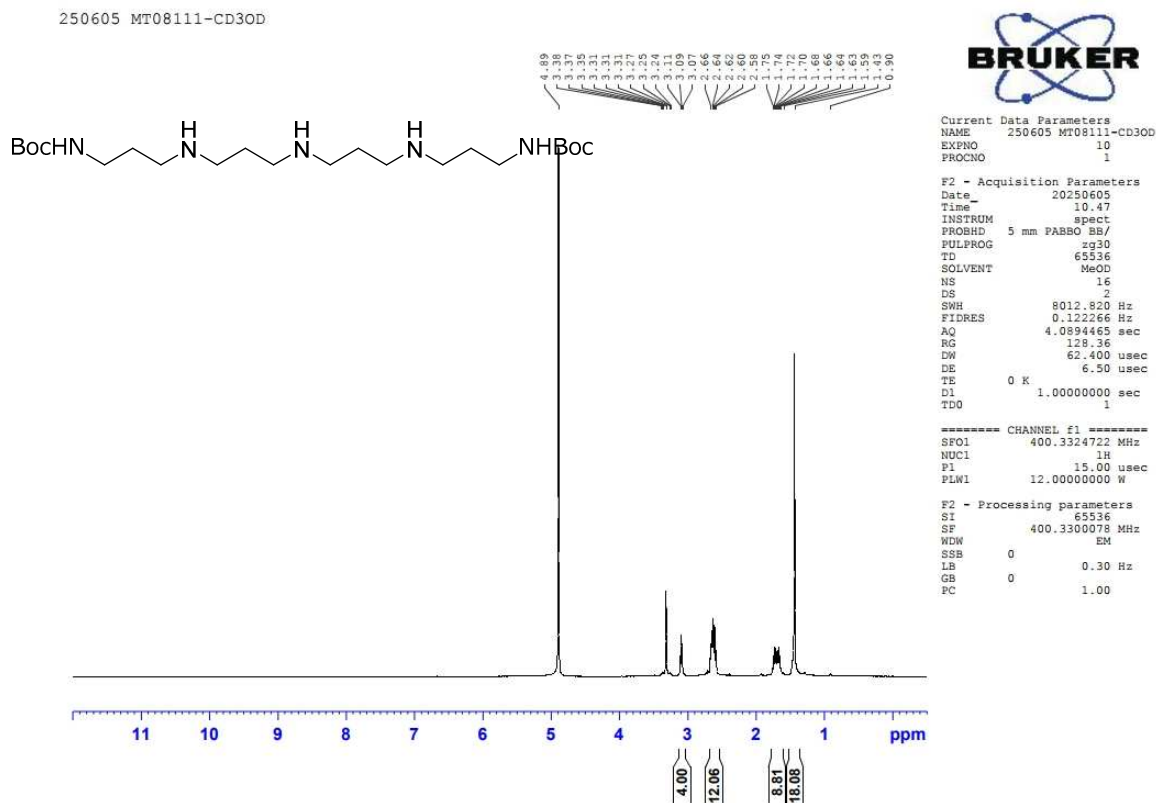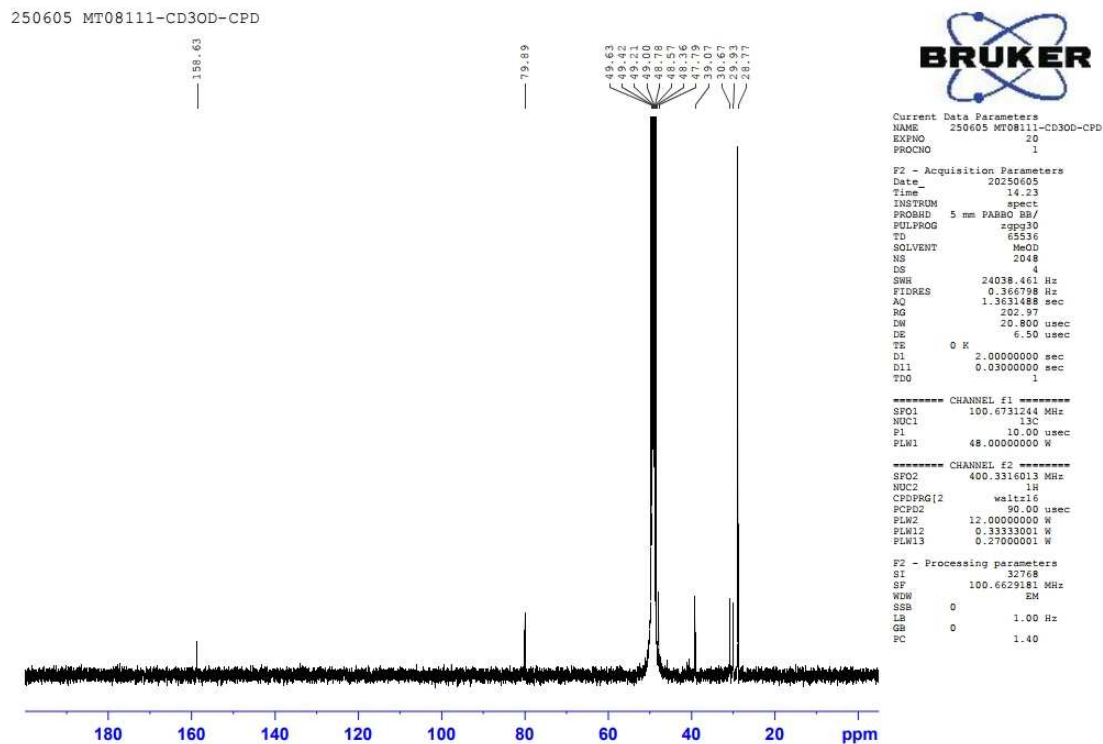

# NMR chart of **14**

250613 MT08115-D2O

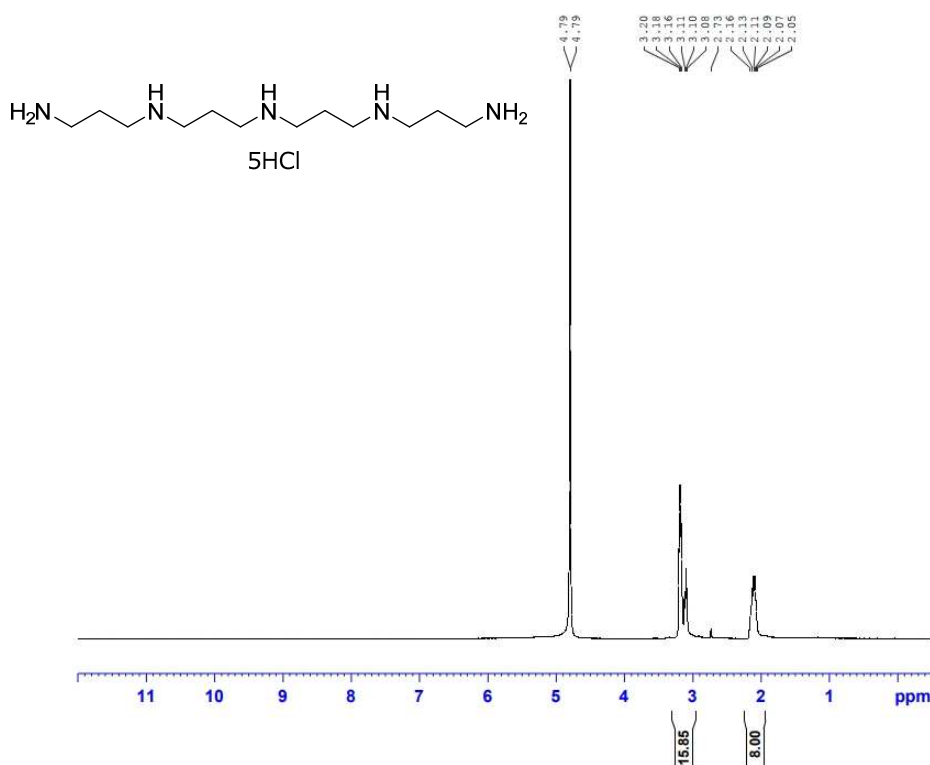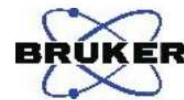

Current Data Parameters  
NAME 250613 MT08115-D2O  
EXPNO 10  
PROCNO 1

F2 - Acquisition Parameters  
Date\_ 20250613  
Time 16.17  
INSTRUM spect  
PROBHD 5 mm PABBO BB/  
PULPROG zg30  
TD 65536  
SOLVENT D2O  
NS 16  
DS 2  
SWH 8012.820 Hz  
FIDRES 0.122266 Hz  
AQ 4.0894465 sec  
RG 144.26  
DW 62.400 usec  
DE 6.50 usec  
TE 0 K  
D1 1.00000000 sec  
TDO 1

CHANNEL f1  
SFO1 400.3324722 MHz  
NUC1 1H  
P1 15.00 usec  
PLW1 12.00000000 W

F2 - Processing parameters  
SI 65536  
SF 400.3299644 MHz  
WDW EM  
SSB 0  
LB 0.30 Hz  
GB 0  
PC 1.00

250613 MT08115-D2O-CPD

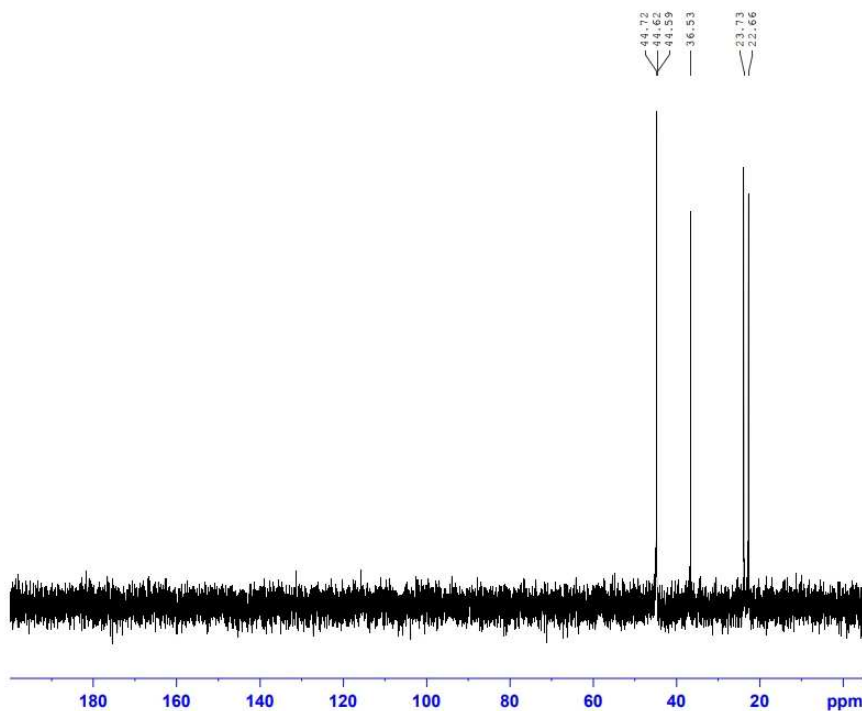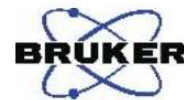

Current Data Parameters  
NAME 250613 MT08115-D2O-CPD  
EXPNO 11  
PROCNO 1

F2 - Acquisition Parameters  
Date\_ 20250613  
Time 17.01  
INSTRUM spect  
PROBHD 5 mm PABBO BB/  
PULPROG zgpg30  
TD 65536  
SOLVENT D2O  
NS 512  
DS 4  
SWH 24038.461 Hz  
FIDRES 0.366798 Hz  
AQ 1.3631488 sec  
RG 202.97  
DW 20.800 usec  
DE 6.50 usec  
TE 0 K  
D1 2.00000000 sec  
D11 0.03000000 sec  
TDO 1

CHANNEL f1  
SFO1 100.6731244 MHz  
NUC1 13C  
P1 10.00 usec  
PLW1 48.00000000 W

CHANNEL f2  
SFO2 400.3316013 MHz  
NUC2 1H  
CPDPRG[2] waltz16  
PCPD2 90.00 usec  
PLW2 12.00000000 W  
PLW12 0.33333001 W  
PLW13 0.27000001 W

F2 - Processing parameters  
SI 32768  
SF 100.6630896 MHz  
WDW EM  
SSB 0  
LB 1.00 Hz  
GB 0  
PC 1.40

# NMR chart of **36**

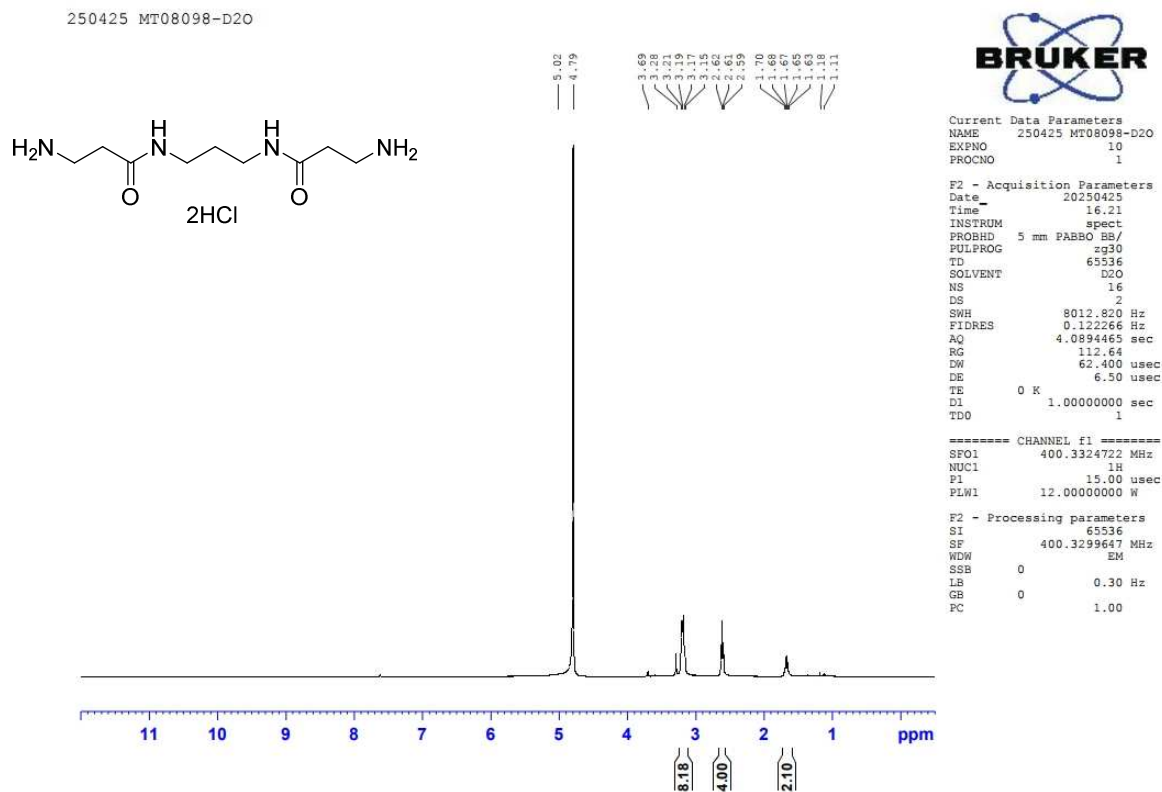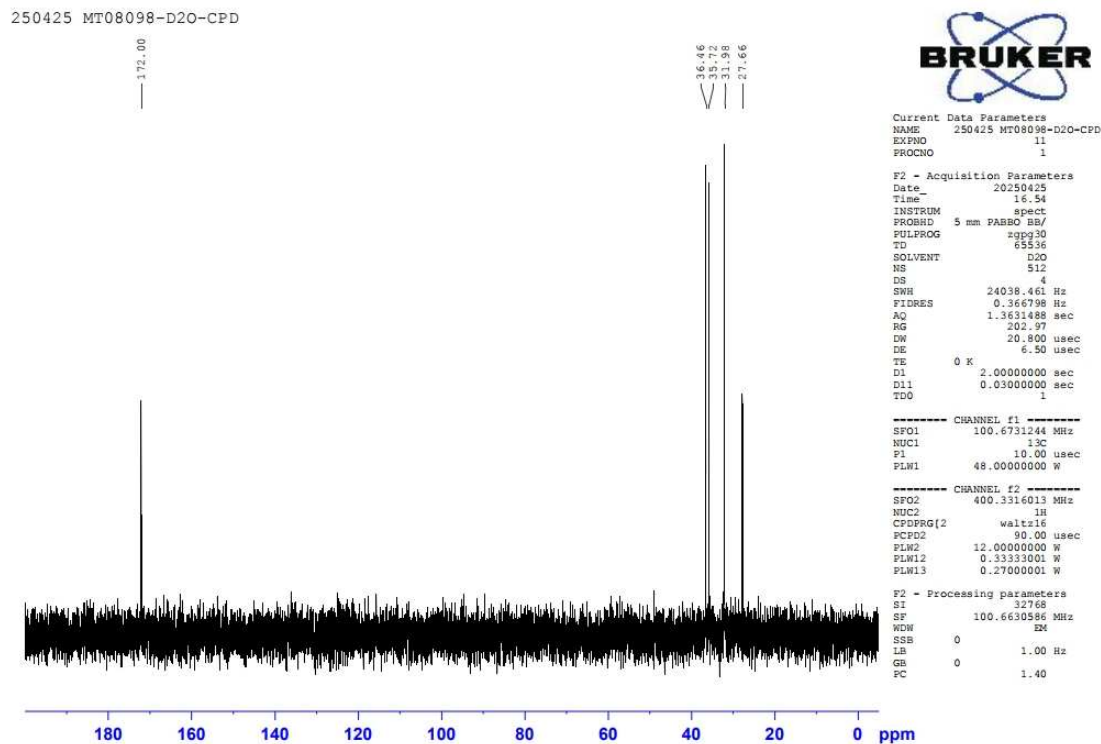



# NMR chart of **37**

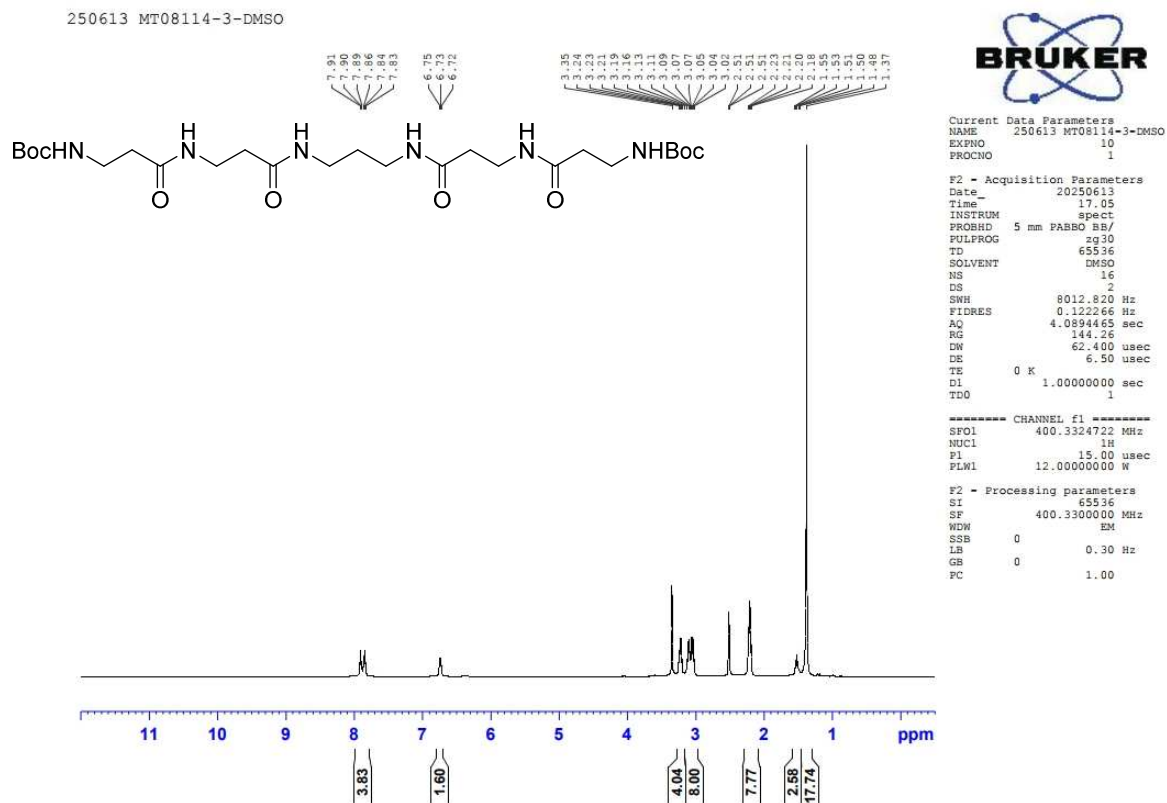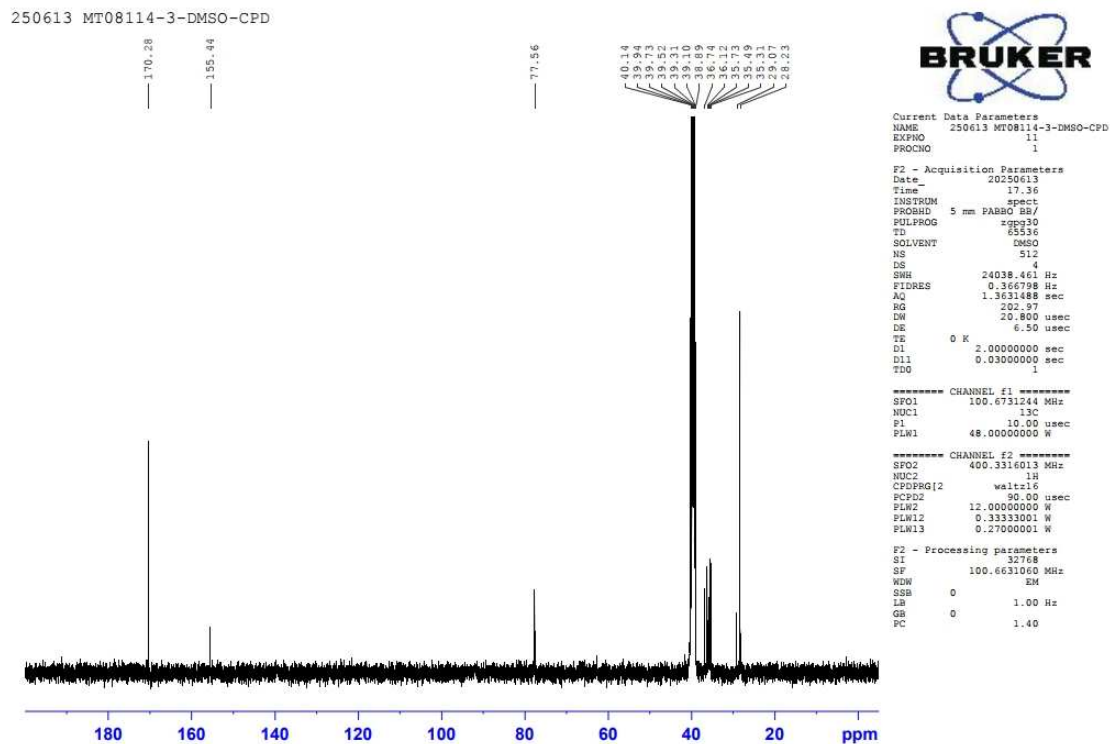



# NMR chart of **38**

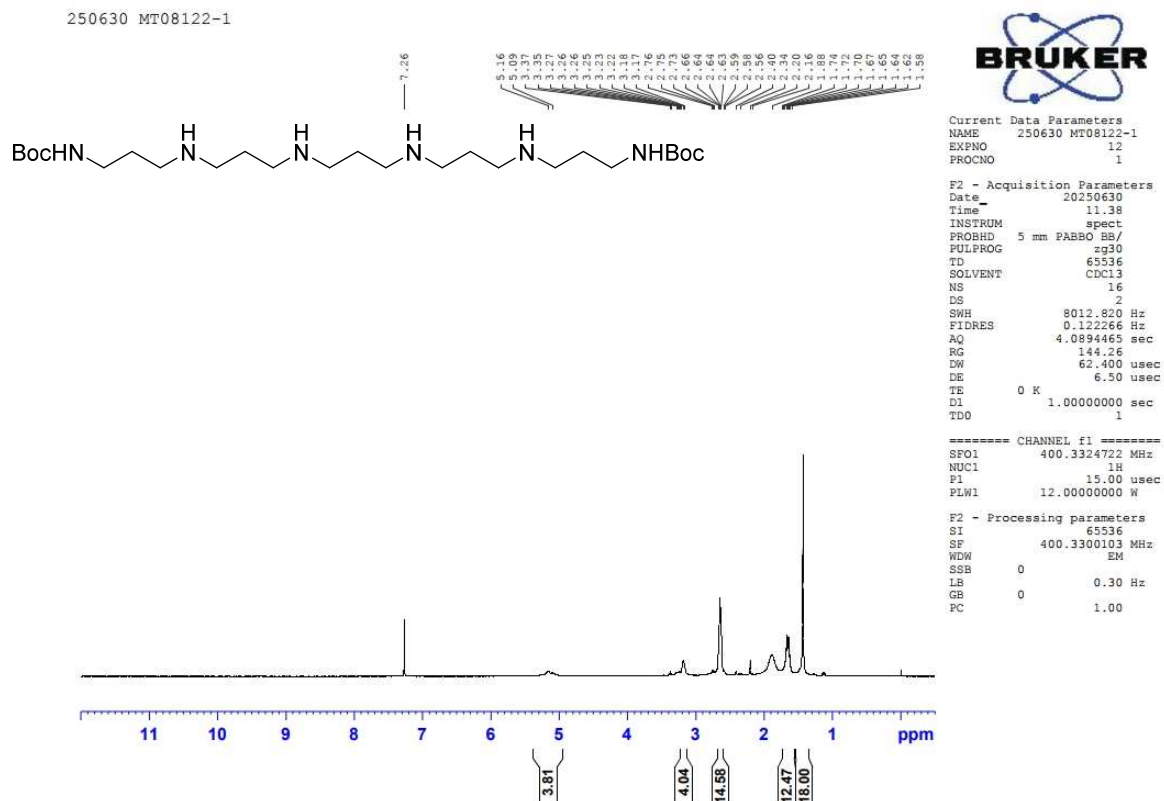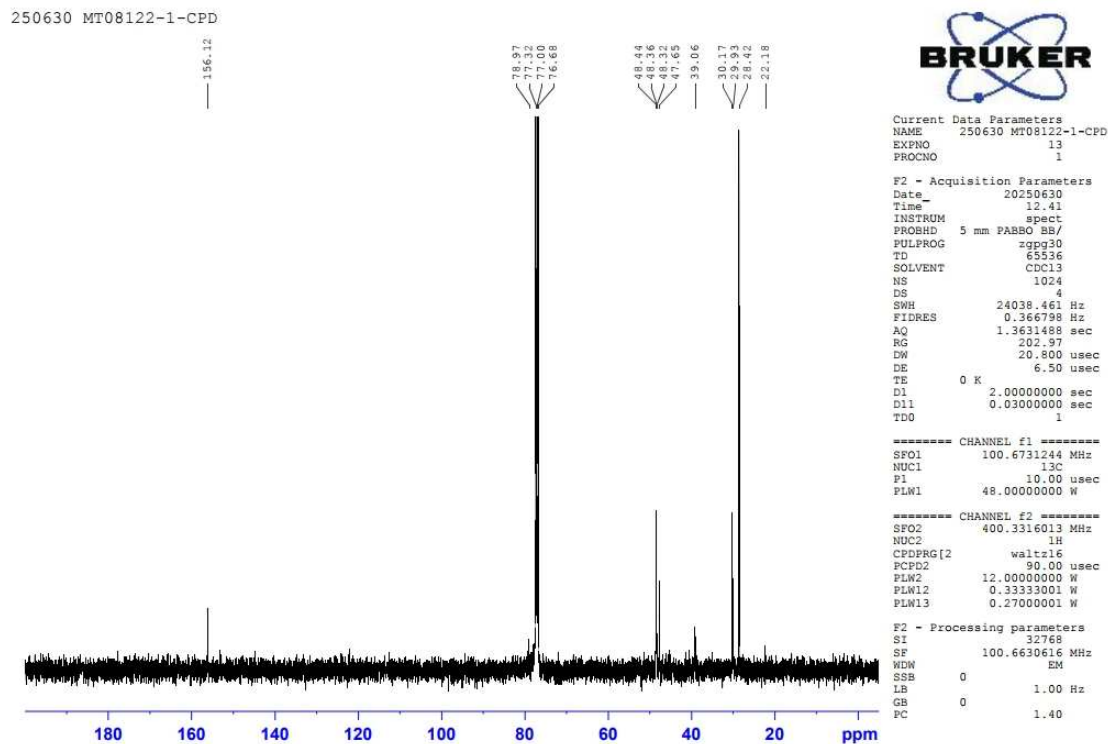

# NMR chart of 17

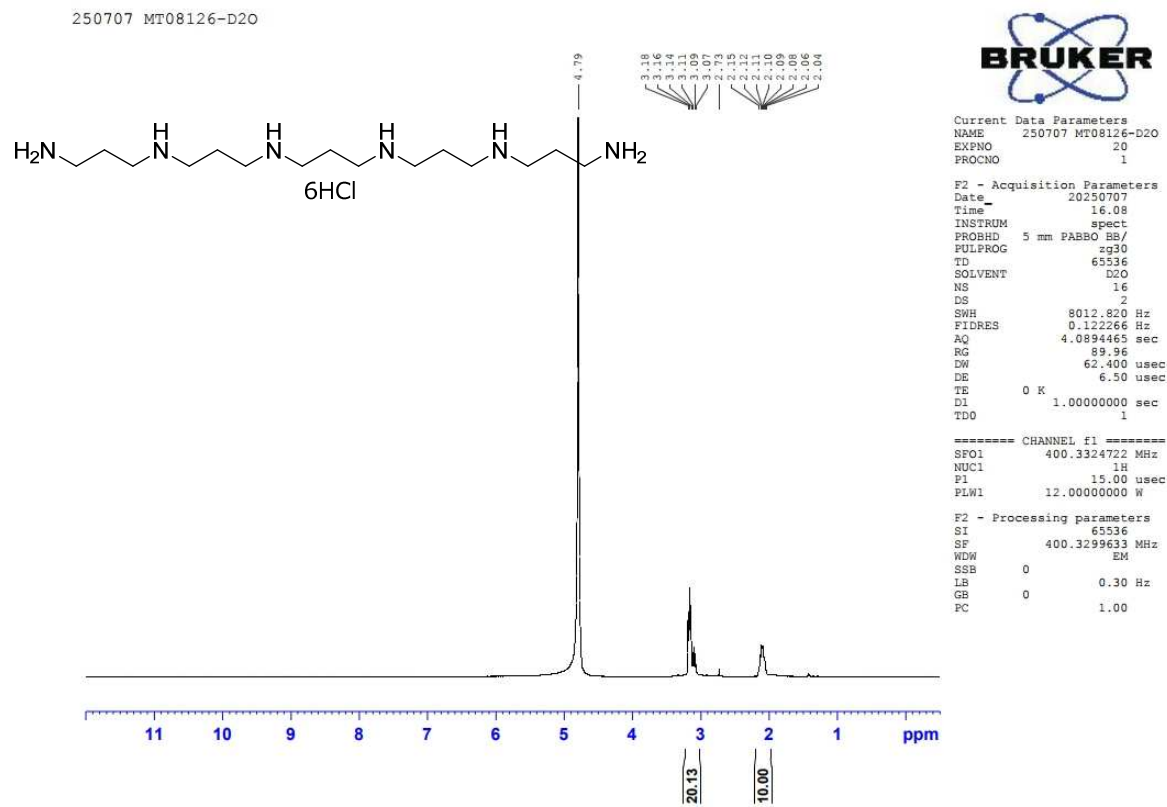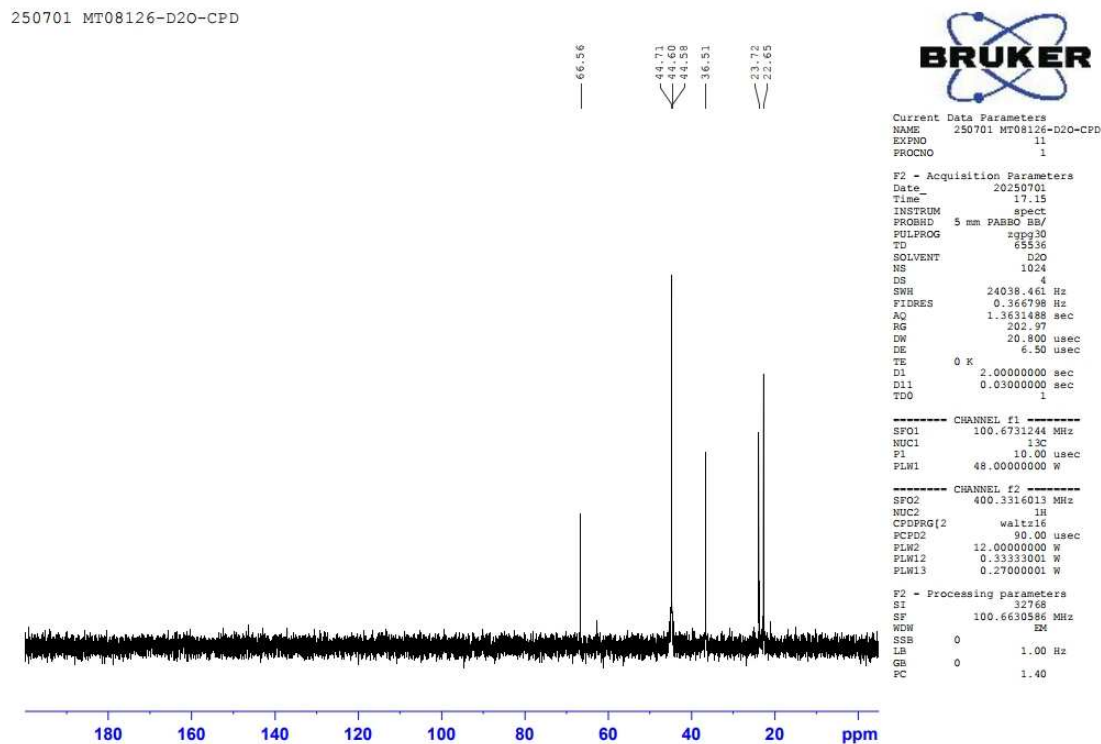

Supplement: d5ob01807b1.pdf [file d5ob01807b1.pdf]
